# Supplementary material for: Syntheses of differentially fluorinated triazole-based 1-deoxysphingosine analogues en route to SphK inhibitors
Source: Royal Society of Chemistry journal article supplement (doi:10.1039/d4ob01656d), 2024-11-11
Supplement: d4ob01656d1.pdf [file d4ob01656d1.pdf]

## SUPPORTING INFORMATION

### Syntheses of differentially fluorinated triazole-based 1-deoxysphingosine analogues *en route* to SphK inhibitors

Adrià Cardona,<sup>a</sup> Varbina Ivanova,<sup>b</sup> Raúl Beltrán-Debón,<sup>c</sup> Xavier Barril,<sup>b</sup> Sergio Castellón,<sup>a</sup> Yolanda Díaz,<sup>a</sup> M. Isabel Matheu<sup>a</sup>

<sup>a</sup>Universitat Rovira i Virgili, Departament de Química Analítica i Química Orgànica, Faculty of Chemistry, C/Marcel·lí Domingo 1, 43007 Tarragona, Spain. E-mail: maribel.matheu@urv.cat.

<sup>b</sup>Universitat de Barcelona, Department of Physical Chemistry, Faculty of Pharmacy, Av. Joan XXIII s/n, Barcelona 08028, Spain

<sup>c</sup>Universitat Rovira i Virgili, Departament de Bioquímica i Biotecnologia, Faculty of Chemistry, C/Marcel·lí Domingo 1, 43007 Tarragona, Spain.

#### Contents

|                                                                         |    |
|-------------------------------------------------------------------------|----|
| 1. General Methods.....                                                 | 2  |
| 2. General procedures .....                                             | 3  |
| 3. Synthetic procedures and characterization data .....                 | 5  |
| 4. <sup>1</sup> H, <sup>13</sup> C and <sup>19</sup> F NMR spectra..... | 18 |
| 5. Sphingosine kinase activity quantification .....                     | 59 |
| 6. Docking studies .....                                                | 63 |
| 6.1. General procedure .....                                            | 63 |
| 6.2. Additional figures .....                                           | 63 |
| 7. References.....                                                      | 70 |

## 1. General Methods

All reagents were purchased from Sigma Aldrich, Alfa Aesar or Carbosynth chemical companies. Dichloromethane ( $\text{CH}_2\text{Cl}_2$ ) was distilled from  $\text{CaH}_2$ .  $\text{CH}_3\text{CN}$  was pre-dried over 4 Å MS, distilled and then stored with activated 4 Å MS. Toluene was stored with activated 4 Å MS, THF was distilled from sodium and  $\text{Et}_3\text{N}$  was stored with activated 4 Å MS. 4 Å MS were activated by heating under high vacuum at 260 °C for 10 h and then were stored at 165 °C.  $^1\text{H}$ ,  $^{13}\text{C}$  and  $^{19}\text{F}$  NMR spectra were recorded on a Varian® Mercury VX 400 or on a Bruker® Avance Ultrashield (400 MHz, 100.6 MHz and 376.5 MHz respectively) spectrometer. NMR signals were fully assigned by COSY, HSQC, NOESY and HMBC experiments. All chemical shifts are quoted on the  $\delta$  scale in ppm using the residual solvent as internal standard ( $^1\text{H}$  NMR:  $\text{CDCl}_3 = 7.26$ ;  $^{13}\text{C}$  NMR:  $\text{CDCl}_3 = 77.16$ ;  $^1\text{H}$  NMR:  $\text{MeOD} = 3.31$ ;  $^{13}\text{C}$  NMR:  $\text{CD}_3\text{OD} = 49.0$ ). Coupling constants ( $J$ ) are reported in Hz with the following splitting abbreviations: s = singlet, d = doublet, t = triplet, q = quartet, p = pentuplet, br s = broad singlet, br d = broad doublet, br t = broad triplet and br q = broad quartet. Infrared (IR) spectra were recorded on a JASCO FTIR-600 plus Fourier Transform Infrared Spectrophotometer wavenumbers ( $\tilde{\nu}$ ) in  $\text{cm}^{-1}$ . ESI MS were run on an Agilent® 1100 Series LC/MSD instrument. Melting points (m.p.) were recorded with Reichert apparatus. Optical rotations were measured on a Perkin–Elmer® 241 polarimeter with a path length of 1.0 dm and are reported with implied units of  $10^{-1} \text{ deg cm}^2 \text{ g}^{-1}$ . Concentrations (c) are given in g/100 ml. Thin layer chromatography (TLC) was carried out on 0.25 mm E. Merck® aluminium backed sheets coated with 60  $\text{F}_{254}$  silica gel. Visualization of the silica plates was achieved using a UV lamp ( $\lambda_{\text{max}} = 254 \text{ nm}$ ) and/or by heating plates that were dipped in a  $\text{H}_2\text{SO}_4$ /ethanol (1:15) or anisaldehyde solution. Flash chromatography was carried out using forced flow of the indicated solvent on Fluka® or Merck® silica gel 60 (230-400 mesh). The biological assays were run on a CLARIOstar® BMG LABTECH's instrument using Corning® 384 low volume well plates.

## 2. General Procedures

**General Procedure for the CuAAC reaction.** A solution of  $\text{CuSO}_4 \cdot 5\text{H}_2\text{O}$  (12.5 mg, 0.05 mol) in 0.6 mL of  $\text{H}_2\text{O}$  was added to a stirring solution of azide **11a-d** (1.05-2.0 mmol) and the terminal alkyne **8** (279 mg, 1 mmol) in 3.5 mL of  $\text{CH}_2\text{Cl}_2$ . Sodium ascorbate (19.8 mg, 0.1 mmol) in 0.7 mL of water was then added dropwise and the mixture was stirred for 48 h at room temperature. The aqueous layer was extracted three times with  $\text{CH}_2\text{Cl}_2$  and the combined organic layers were dried over anhydrous  $\text{MgSO}_4$ , filtered, and evaporated under reduced pressure. The crude product **12a-d** was purified by column chromatography (Hexanes:AcOEt 9:1 to 7:3).

**General Procedure for the debenylation or simultaneous reduction of alkenes and debenylation.** 30% Pd/C (percent of catalyst (Pd/C (10 wt%)) loading relative to the substrate by weight)) was added to a flask containing the *N,N*-dibenzylamino compound **12a-d** (1 mmol) in 2.6 mL of methanol. The inside air was replaced with  $\text{H}_2$  (balloon) by three vacuum/ $\text{H}_2$  cycles. The reaction mixture fitted with the hydrogen balloon was then stirred at room temperature until the TLC monitoring indicated the complete consumption of the starting material (24-48 h). The mixture was filtered through Celite, concentrated in vacuo and then purified by flash column chromatography.

**General Procedure for *N,N*-dimethylation of amines 1a-d to furnish 3a-d.**  $\text{NaBH}_3\text{CN}$  (0.090 g, 1.42 mmol) was added to a cold (0 °C) mixture of the free amine (0.129 mmol) and paraformaldehyde (0.039 g, 1.29 mmol) in 1 mL of  $\text{CH}_3\text{OH}$  and the resulting reaction mixture was stirred at room temperature for 48 h. The solvent was then evaporated and the crude was redissolved in  $\text{CHCl}_3$ . The resulting organic phase was washed with brine, dried over  $\text{MgSO}_4$  and concentrated under reduced pressure. The crude product was purified by flash chromatography (silica gel,  $\text{CHCl}_3$ :MeOH: $\text{NH}_4\text{OH}$  9:1:0.1) to give the dimethyl amine derivative.

**General Procedure for the monomethylation of amines 1a-d to furnish 2a-d.**  $\text{Boc}_2\text{O}$  (0.126 mmol, 1.15 equiv) was added to a solution on free amine derivative **1a-d** (0.110 mmol) in 0.1 mL of  $\text{CH}_3\text{OH}$ . The reaction mixture was stirred for 16 h at room temperature and it was then concentrated under vacuum. The crude product was redissolved in  $\text{CH}_2\text{Cl}_2$  and washed with brine. The organic layer was dried over anhydrous  $\text{MgSO}_4$ , filtered and

concentrated under reduced pressure. Without further purification, the Boc derivative was dissolved in THF and added dropwise to a suspension of LiAlH<sub>4</sub> (3 equiv) and the reaction mixture was refluxed for 24 h and allowed to warm to room temperature. A 1M NaOH solution was then added dropwise and the slurry was filtered through Celite. The resulting filtrate was extracted with AcOEt. The organic layer was dried over anhydrous MgSO<sub>4</sub>, filtered and concentrated under reduced pressure. The crude product was purified by flash chromatography (silica gel, CHCl<sub>3</sub>:MeOH:NH<sub>4</sub>OH 9:1:0.1) to give the monomethyl amine **2a-d**.

**General Procedure for the guanidination of amines 1a-d to furnish 15a-d.** A mixture the amine **1a-d** (0.200 mmol, 1 equiv.), *N,N'*-di-Boc-1*H*-pyrazole-1-carboxiamidine (**14**) (0.070 g, 0.220 mmol, 1.10 equiv) and triethylamine (28 μL, 0.200 mmol, 1 equiv) in 1 mL of a 3:2 v/v mixture of dry CH<sub>2</sub>Cl<sub>2</sub>:DME was stirred at room temperature under argon atmosphere for 12 h. The solvent was then removed under reduced pressure and the residue was purified by flash chromatography (9:1 to 6:4 hexanes/EtOAc) to give the Boc guanidino derivative **15a-d**.

**General Procedure for the Boc deprotection of the protected guanidino derivatives 15a-d to afford 4a-d.** A solution of protected guanidino derivatives **15a-d** (0.150 mmol, 1 equiv) in 2 mL of TFA/CH<sub>2</sub>Cl<sub>2</sub> (1:1, v/v) was stirred at room temperature for approximately 4 h (or otherwise shown by TLC). The solution was then concentrated in vacuo and purified by flash chromatography (silica gel, CHCl<sub>3</sub>:MeOH:NH<sub>4</sub>OH 9:1:0.1 to 9:3:0.3) to give the free guanidino compound **4a-d**.

### 3. Synthetic procedures and characterization data

**(3R,4S)-4-(Dibenzylamino)pent-1-yn-3-ol (8):**<sup>1</sup> To a solution of oxalyl chloride (0.6 ml, 7.05 mmol, 1.5 equiv.) in CH<sub>2</sub>Cl<sub>2</sub> (4.2 ml) a solution of DMSO (0.73 ml, 10.34 mmol, 2.2 equiv.) and CH<sub>2</sub>Cl<sub>2</sub> (5.0 ml) was added dropwise at -78 °C. The mixture was stirred for 15 min at the same temperature. Then, a solution of (*S*)-2-dibenzylaminopropan-1-ol 5<sup>2</sup> (1.2 g, 4.70 mmol, 1 equiv.) in 33 mL of CH<sub>2</sub>Cl<sub>2</sub> was added dropwise to the mixture. After 30 min, Et<sub>3</sub>N (2.6 ml, 18.8 mmol, 4 equiv.) was added and the reaction mixture was allowed to warm to room temperature for 2 h. Then, the reaction was quenched by addition of saturated solution of NH<sub>4</sub>Cl and extracted several times with CH<sub>2</sub>Cl<sub>2</sub>. The combined organic layers were dried over MgSO<sub>4</sub> and concentrated under reduced pressure. The crude aldehyde was then dissolved in 7 mL of THF at -78 °C, and 0.5 M ethynyl magnesium bromide (28.21 mL, 14.1 mmol, 3.0 equiv.) was then added slowly. The mixture was warmed up to -30 °C and allowed to react for 18 hours, after which NH<sub>4</sub>Cl (20 mL) was added. The aqueous layer was extracted using dichloromethane (3 x 20 mL portions), and the combined organic layers were dried over MgSO<sub>4</sub>, filtered and concentrated under reduced pressure. The crude consisting of a 9:1 *anti:syn* diastereomeric mixture was purified using flash column chromatography (hexane : ethyl acetate = 9 : 1) to afford **8** as a dark yellow oil in 86% yield (1.13 g, 4.04 mmol), with spectroscopic data in agreement with those described in the literature: <sup>1</sup>H NMR (400 MHz; CDCl<sub>3</sub>): δ 7.34-7.23 (m, 10H), 4.20 (d, 2H, *J* = 13.2 Hz), 4.18 (m, 1H) 3.37 (d, *J* = 13.2 Hz, 2H), 3.04 (m, 1H), 2.44 (d, *J* = 1.2 Hz, 1H), 1.23 (d, *J* = 6.8 Hz, 3H). <sup>13</sup>C NMR (100.6 MHz; CDCl<sub>3</sub>): δ 139.0, 129.2, 128.5, 127.4, 83.8, 74.3, 62.7, 55.4, 54.6, 9.3.

***N*-((2*S*,3*S*)-3-hydroxypent-4-yn-2-yl)-1*H*-isoindole-1,3(2*H*)-dione and *N*-((2*S*,3*R*)-3-hydroxypent-4-yn-2-yl)-1*H*-isoindole-1,3(2*H*)-dione (9):** A solution of DMSO (0.65 mL, 9.11 mmol, 2.2 equiv.) and CH<sub>2</sub>Cl<sub>2</sub> (4.0 ml) was added dropwise at -78 °C to a solution of oxalyl chloride (0.5 mL, 6.21 mmol, 1.5 equiv.) in CH<sub>2</sub>Cl<sub>2</sub> (4.0 mL). The mixture was stirred for 15 min at that temperature. A solution of **6**<sup>3</sup> (851 mg, 4.14 mmol, 1 equiv.) in 28 mL of CH<sub>2</sub>Cl<sub>2</sub> was then added dropwise to the mixture. After 30 min, Et<sub>3</sub>N (2.3 mL, 16.6 mmol, 4 equiv.) was added and the reaction mixture was allowed to warm to room temperature for 2 h. The reaction was then quenched by addition of saturated solution of NH<sub>4</sub>Cl and extracted several times with CH<sub>2</sub>Cl<sub>2</sub>. The combined organic layers were dried over MgSO<sub>4</sub> and

concentrated under reduced pressure. The crude aldehyde was then dissolved in 12 mL of THF at -78 °C, and 0.5 M ethynyl magnesium bromide (24.8 mL, 12.42 mmol, 3.0 equiv.) was added slowly. The mixture was warmed up to -30 °C and allowed to react for 14 hours, after which NH<sub>4</sub>Cl (20 mL) was added. The aqueous layer was extracted using dichloromethane (3 x 20 mL portions), and the combined organic layers were dried over MgSO<sub>4</sub>, filtered and concentrated under reduced pressure. The crude was purified using flash column chromatography (hexane : ethyl acetate = 9 : 1) to afford **9** as a 1:1 mixture of diastereoisomers as a dark yellow oil in a 95% yield (0.9 g, 3.93 mmol). <sup>1</sup>H NMR (400 MHz, CDCl<sub>3</sub>) δ 7.67 – 7.38 (m, 4H), 4.78 – 4.75 (m, 0.5H), 4.73 (t, *J* = 2.1 Hz, 0.5H), 4.26-4.18 (m, 0.5H), 4.07 (qd, *J* = 7.1 Hz, *J* = 2.9 Hz, 0.5H), 2.46 (d, *J* = 2.1 Hz, 0.5H), 2.42 (d, *J* = 2.1 Hz, 0.5H), 1.56 (d, *J* = 7.1 Hz, 1.5H), 1.56 (d, *J* = 7.1 Hz, 1.5H). HRMS (ESI-TOF): [M+H]<sup>+</sup> *m/z* calcd for C<sub>13</sub>H<sub>12</sub>NO<sub>3</sub>: 230.0817; found: 230.0820. FT-IR (ATR) ν in cm<sup>-1</sup>: 3391, 32270 (br), 3093, 3038, 2903, 2280, 1782, 1748, 1349, 1313, 1213, 1127, 1051, 837,672.

**(1*S*,2*S*)-2-(dibenzylamino)-1-(1-dodecyl-1*H*-1,2,3-triazol-4-yl)propan-1-ol (12a):** A solution of CuSO<sub>4</sub>·5H<sub>2</sub>O (18 mg, 0.07 mmol) in 0.9 mL of H<sub>2</sub>O was added to a solution of 1-azidododecane **11a**<sup>4</sup> (605 mg, 2.86 mmol) and alkyne **8** (400 mg, 1.43 mmol) in 5 mL of CH<sub>2</sub>Cl<sub>2</sub>. Sodium ascorbate (36 mg, 0.143 mmol) in 1.3 mL of H<sub>2</sub>O was then added dropwise and the mixture was stirred for 48 h at room temperature. The aqueous layer was extracted three times with CH<sub>2</sub>Cl<sub>2</sub> and the combined organic layers were dried over anhydrous MgSO<sub>4</sub>, filtered, and evaporated under reduced pressure. The crude product was purified by column chromatography (Hexanes:AcOEt 9:1 to 7:3) to afford **12a** (387 mg, 0.788 mmol, 55%) as a pale yellow oil as the single anti diastereoisomer. [α]<sub>D</sub><sup>25</sup> -21.67 (c 0.6, CHCl<sub>3</sub>). <sup>1</sup>H NMR (400 MHz, CDCl<sub>3</sub>): δ 7.31 – 7.13 (m, 10H), 7.04 (s, 1H), 4.89 (d, *J* = 6.9 Hz, 1H), 4.19 (t, *J* = 7.2 Hz, 2H), 3.91 (br s, 1H), 3.62 (d, *J* = 13.7 Hz, 2H), 3.41 (d, *J* = 13.7 Hz, 2H), 3.19 (p, *J* = 6.9 Hz, 1H), 1.81 – 1.71 (m, 2H), 1.35 – 1.19 (m, 18H), 0.90 (t, *J* = 6.9 Hz, 3H). <sup>13</sup>C NMR (100.6 MHz, CDCl<sub>3</sub>): δ 150.3, 139.6, 128.8, 128.0, 126.8, 120.9, 68.2, 57.3, 54.3, 50.0, 31.8, 30.1, 29.5, 29.4, 29.2, 29.2, 28.9, 26.3, 22.5, 14.0, 9.0. HRMS (ESI-TOF): [M+H]<sup>+</sup> *m/z* calcd for C<sub>31</sub>H<sub>47</sub>N<sub>4</sub>O: 491.3750; found: 491.3738. FT-IR (ATR) ν in cm<sup>-1</sup>: 3329, 2923, 1602, 1494, 1454, 1044, 1028, 1216.

**(1*S*,2*S*)-2-amino-1-(1-dodecyl-1*H*-1,2,3-triazol-4-yl)propan-1-ol (1a):** 30% Pd/C (Pd/C (10 wt%) to substrate ratio, 114 mg) was added to a flask containing a solution of **12a** (0.380

g, 0.7743 mmol) in 2 mL of CH<sub>3</sub>OH. The flask was equipped with a hydrogen balloon and the mixture was stirred at r.t. for 24 h. The mixture was filtered through Celite, concentrated *in vacuo* and then purified by flash column chromatography (silica gel, CHCl<sub>3</sub>:MeOH:NH<sub>4</sub>OH 9:1:0.1) to give **1a** as a white wax (0.211 g, 0.681 mmol, 88%).  $[\alpha]_D^{25}$  -1.4 (c 0.34, CH<sub>3</sub>OH). <sup>1</sup>H NMR (400 MHz, CD<sub>3</sub>OD): δ 7.89 (s, 1H), 4.67 (dd, *J* = 4.9 Hz, *J* = 0.4 Hz, 1H), 4.40 (t, *J* = 7.1 Hz, 2H), 3.20 (qd, *J* = 6.6 Hz, *J* = 4.9 Hz, 1H), 1.95 – 1.86 (m, 2H), 1.39 – 1.21 (m, 18H), 1.03 (d, *J* = 6.6 Hz, 3H), 0.90 (t, *J* = 6.9 Hz, 3H). <sup>13</sup>C NMR (100.6 MHz, CD<sub>3</sub>OD): δ 150.1, 124.0, 72.2, 52.3, 51.4, 33.1, 31.3, 30.8, 30.8, 30.7, 30.6, 30.5, 30.1, 27.5, 23.8, 17.8, 14.5. HRMS (ESI-TOF): [M+H]<sup>+</sup> *m/z* calcd for C<sub>17</sub>H<sub>35</sub>N<sub>4</sub>O: 311.2809; found: 311.2814. FT-IR (ATR) ν in cm<sup>-1</sup>: 3356, 2955, 2922, 1645, 1460, 1149, 1050.

**(1*S*,2*S*)-2-(dimethylamino)-1-(1-dodecyl-1*H*-1,2,3-triazol-4-yl)propan-1-ol (3a):**

Compound **1a** (0.040 g, 0.129 mmol) was treated with paraformaldehyde (0.039 g, 1.29 mmol) and NaBH<sub>3</sub>CN (0.090 g, 1.42 mmol) following the general procedure for *N,N'*-dimethylation of amines. The crude product was purified by column chromatography (silica gel, CHCl<sub>3</sub>:MeOH:NH<sub>4</sub>OH 9:1:0.1) to give **3a** as a yellowish wax (33 mg, 0.098 mmol, 76%).  $[\alpha]_D^{25}$  +12.3 (c 1.05, CHCl<sub>3</sub>). <sup>1</sup>H NMR (400 MHz, CDCl<sub>3</sub>): δ 7.49 (d, *J* = 0.6 Hz, 1H), 5.04 (dd, *J* = 4.3 Hz, *J* = 0.6 Hz, 1H), 4.31 (t, *J* = 7.2 Hz, 2H), 2.80 (qd, *J* = 6.8 Hz, *J* = 4.3 Hz, 1H), 2.30 (s, 6H), 1.87 (p, *J* = 7.2 Hz, 2H), 1.33 – 1.19 (m, 18H), 0.92 (d, *J* = 6.8 Hz, 3H), 0.86 (t, *J* = 6.9 Hz, 3H). <sup>13</sup>C NMR (100.6 MHz, CDCl<sub>3</sub>): δ 150.0, 121.2, 67.4, 63.5, 50.3, 42.7, 31.8, 30.2, 29.7, 29.6, 29.5, 29.4, 28.9, 26.4, 22.6, 14.1, 9.8. HRMS (ESI-TOF): [M+H]<sup>+</sup> *m/z* calcd for C<sub>19</sub>H<sub>39</sub>N<sub>4</sub>O: 339.3124; found: 339.3123. FT-IR (ATR) ν in cm<sup>-1</sup>: 3327, 2921, 1653, 1457, 1216.

***N,N'*-bis(*tert*-butoxycarbonyl)-1-((1*S*,2*S*)-1-(1-dodecyl-1*H*-1,2,3-triazol-4-yl)-1-**

**hydroxypropan-2-yl)guanidine (15a):** Compound **15a** was prepared following the general procedure for the guanidination of amines starting from amine **1a** (94 mg, 0.303 mmol, 1 equiv.). The reaction crude was purified by flash chromatography (9:1 to 6:4 hexanes/EtOAc) to give **15a** (126 mg, 0.228 mmol, 75%) as a white foam.  $[\alpha]_D^{25}$  +130.1 (c 1.16, CHCl<sub>3</sub>). <sup>1</sup>H NMR (400 MHz, CDCl<sub>3</sub>): δ 11.41 (s, 1H), 8.37 (d, *J* = 7.0 Hz, 1H), 7.51 (d, *J* = 0.6 Hz, 1H), 6.45 (br s, 1H), 5.04 (dd, *J* = 2.1 Hz, *J* = 0.6 Hz, 1H), 4.49 (pd, *J* = 7.0 Hz, *J* = 2.1 Hz, 1H),

4.30 (t,  $J = 7.3$  Hz, 2H), 1.90 – 1.81 (m, 2H), 1.46 (s, 9H), 1.45 (s, 9H), 1.30 – 1.20 (m, 21H), 0.85 (t,  $J = 6.9$  Hz, 3H).  $^{13}\text{C}$  NMR (100.6 MHz,  $\text{CDCl}_3$ ):  $\delta$  162.7, 157.0, 152.9, 148.7, 121.7, 83.7, 79.7, 71.9, 53.1, 50.4, 32.0, 30.3, 29.7, 29.6, 29.5, 29.4, 29.1, 28.3, 28.1, 26.5, 22.8, 16.0, 14.2. HRMS (ESI-TOF):  $[\text{M}+\text{H}]^+$   $m/z$  calcd for  $\text{C}_{28}\text{H}_{53}\text{N}_6\text{O}_5$ : 553.4077; found: 553.4074. FT-IR (ATR)  $\nu$  in  $\text{cm}^{-1}$ : 3284, 2979, 2915, 1719, 1652, 1584, 1130, 1053.

**1-((1*S*,2*S*)-1-(1-dodecyl-1*H*-1,2,3-triazol-4-yl)-1-hydroxypropan-2-yl) guanidine (4a):**

Compound **4a** was prepared following the general procedure for the Boc deprotection of the protected guanidino derivatives **15a-d** starting from **15a** (0.086 g, 0.155 mmol). The residue was purified by flash chromatography (silica gel,  $\text{CHCl}_3$ :MeOH: $\text{NH}_4\text{OH}$  9:1:0.1 to 9:3:0.3). The collected fractions were washed with NaOH 1M to give **4a** (0.054 g, 0.154 mmol, 99%) as a yellowish syrup.  $[\alpha]_D^{25}$  -26.13 (c 0.3,  $\text{CH}_3\text{OH}$ ).  $^1\text{H}$  NMR (400 MHz,  $\text{CD}_3\text{OD}$ ):  $\delta$  7.93 (s, 1H), 4.91 – 4.89 (m, 1H), 4.40 (t,  $J = 7.1$  Hz, 2H, H-6), 3.98 (qd,  $J = 6.7$  Hz,  $J = 3.9$  Hz, 1H), 1.94 – 1.85 (m, 2H), 1.37 – 1.24 (m, 18H), 1.15 (d,  $J = 6.7$  Hz, 3H), 0.90 (t,  $J = 6.9$  Hz, 3H).  $^{13}\text{C}$  NMR (100.6 MHz,  $\text{CD}_3\text{OD}$ ):  $\delta$  158.7, 149.4, 124.3, 70.4, 53.7, 51.4, 33.1, 31.3, 30.8, 30.7, 30.6, 30.5, 30.1, 27.5, 23.7, 15.7, 14.5. HRMS (ESI-TOF):  $[\text{M}+\text{H}]^+$   $m/z$  calcd for  $\text{C}_{18}\text{H}_{37}\text{N}_6\text{O}$ : 353.3029; found: 353.3023. FT-IR (ATR)  $\nu$  in  $\text{cm}^{-1}$ : 3328, 3161, 2923, 1669, 1653, 1457, 1202, 1179, 1135.

**(1*S*,2*S*)-1-(1-dodecyl-1*H*-1,2,3-triazol-4-yl)-2-(methylamino)propan-1-ol (2a):**

Compound **2a** was prepared from amine **1a** (36.5 mg, 0.117 mmol), following the general procedure for the monomethylation of amines **1a-d**. The crude product was purified by flash chromatography (silica gel,  $\text{CHCl}_3$ :MeOH: $\text{NH}_4\text{OH}$  9:1:0.1) to give **2a** (23 mg, 0.071 mmol, 61%) as a white wax.  $[\alpha]_D^{25}$  +10.4 (c 0.14,  $\text{CHCl}_3$ ).  $^1\text{H}$  NMR (400 MHz,  $\text{CD}_3\text{OD}$ ):  $\delta$  7.87 (d,  $J = 0.5$  Hz, 1H), 4.93 (dd,  $J = 4.1$  Hz,  $J = 0.5$  Hz, 1H), 4.39 (t,  $J = 7.1$  Hz, 2H), 2.99 (qd,  $J = 6.6$  Hz,  $J = 4.1$  Hz, 2H), 2.45 (s, 3H), 1.95 – 1.86 (m, 2H), 1.36 – 1.24 (m, 18H), 1.01 (d,  $J = 6.6$  Hz, 3H), 0.90 (t,  $J = 6.9$  Hz, 3H).  $^{13}\text{C}$  NMR (100.6 MHz,  $\text{CD}_3\text{OD}$ ):  $\delta$  150.6, 123.9, 68.9, 60.3, 51.4, 33.5, 33.1, 31.3, 30.8, 30.6, 30.6, 30.5, 30.1, 27.5, 23.7, 14.5, 13.9. HRMS (ESI-TOF):  $[\text{M}+\text{H}]^+$   $m/z$  calcd for  $\text{C}_{18}\text{H}_{37}\text{N}_4\text{O}$ : 325.2967; found: 325.2962. FT-IR (ATR)  $\nu$  in  $\text{cm}^{-1}$ : 3279, 2953, 2919, 1653, 1466, 1143, 1056.

**(1*S*,2*S*)-2-(dibenzylamino)-1-(1-((*Z*)-12,12,12-trifluorododec-9-en-1-yl)-1*H*-1,2,3-**

**triazol-4-yl)propan-1-ol (12b):** Compound **12b** was prepared following the general



procedure for the CuAAC reaction. A solution of  $\text{CuSO}_4 \cdot 5\text{H}_2\text{O}$  (14 mg, 0.056 mmol) in 0.7 mL of  $\text{H}_2\text{O}$  was added to a solution of azide **11b**<sup>4</sup> (0.340 g, 1.29 mmol) and the terminal alkyne **8** (0.328 g, 1.174 mmol) in 4 mL of  $\text{CH}_2\text{Cl}_2$ . Sodium ascorbate (23 mg, 0.117 mmol) in 0.8 mL of  $\text{H}_2\text{O}$  was then added dropwise and the mixture was stirred for 48 h at room temperature. After the work up, the crude product was purified by column chromatography (Hexanes:AcOEt 9:1 to 6:4) to give **12b** (0.310 g, 0.571 mmol, 49 %) as a yellowish oil.  $[\alpha]_D^{25} -21.74$  (c 0.15,  $\text{CHCl}_3$ ).  $^1\text{H}$  NMR (400 MHz,  $\text{CDCl}_3$ ):  $\delta$  7.32 – 7.16 (m, 10H), 7.10 (s, 1H), 5.76 – 5.65 (m, 1H), 5.43 – 5.34 (m, 1H), 4.87 (d,  $J = 6.7$  Hz, 1H), 4.22 (t,  $J = 7.2$  Hz, 2H), 3.63 (d,  $J = 13.7$  Hz, 2H), 3.47 (br s, 1H, OH), 3.42 (d,  $J = 13.7$  Hz, 2H), 3.20 (p,  $J = 6.7$  Hz, 1H), 2.90 – 2.78 (m, 2H), 2.04 (q,  $J = 6.9$  Hz, 2H), 1.81 – 1.72 (m, 2H), 1.41 – 1.18 (m, 13H).  $^{13}\text{C}$  NMR (100.6 MHz,  $\text{CDCl}_3$ ):  $\delta$  150.3, 139.6, 136.4 (C-14), 128.8, 127.9, 126.7, 126.0 (q,  $J = 276.5$  Hz), 120.8, 116.5 (q,  $J = 3.4$  Hz), 68.2, 57.3, 54.2, 49.9, 31.9 (q,  $J = 29.5$  Hz), 30.0, 29.0, 28.8, 28.8, 28.7, 27.1, 26.2, 8.9. HRMS (ESI-TOF):  $[\text{M}+\text{H}]^+$   $m/z$  calcd for  $\text{C}_{31}\text{H}_{42}\text{F}_3\text{N}_4\text{O}$ : 543.3311; found: 543.3310. FT-IR (ATR)  $\nu$  in  $\text{cm}^{-1}$ : 3381, 3027, 2926, 2854, 1602, 1453, 1347, 1251, 1131, 699, 660.

**(1S,2S)-2-(dibenzylamino)-1-(1-((Z)-11,11,12,12,12-pentafluorododec-8-en-1-yl)-1H-1,2,3-triazol-4-yl)propan-1-ol (12c)**: Compound **12c** was prepared following the general procedure for the CuAAC reaction. A solution of  $\text{CuSO}_4 \cdot 5\text{H}_2\text{O}$  (14 mg, 0.056 mmol) in 0.7 mL of  $\text{H}_2\text{O}$  was added to a mixture of the azide **11c**<sup>4</sup> (0.345 g, 1.15 mmol) and the terminal alkyne **8** (0.307 g, 1.1 mmol) in 3.5 mL of  $\text{CH}_2\text{Cl}_2$ . Sodium ascorbate (22 mg, 0.1101 mmol) in 0.8 mL of  $\text{H}_2\text{O}$  was then added dropwise and the mixture was stirred for 48 h at room temperature. After the work up, the crude product was purified by column chromatography (Hexanes:AcOEt 9:1 to 6:4) to give **12c** (0.425 g, 0.74 mmol, 69%) as a yellowish oil.  $[\alpha]_D^{25} -21.7$  (c 0.5,  $\text{CHCl}_3$ ).  $^1\text{H}$  NMR (400 MHz,  $\text{CDCl}_3$ ):  $\delta$  7.31 – 7.17 (m, 10H), 7.10 (d,  $J = 0.5$  Hz, 1H), 5.77 – 5.67 (m, 1H), 5.44 – 5.34 (m, 1H), 4.90 – 4.83 (m, 1H), 4.21 (t,  $J = 7.0$  Hz, 2H), 3.62 (d,  $J = 13.7$  Hz, 2H), 3.41 (d,  $J = 13.7$  Hz, 3H), 3.20 (p,  $J = 6.8$  Hz, 1H), 2.80 (td,  $J = 17.8$  Hz,  $J = 7.4$  Hz, 2H), 2.06 – 1.98 (m, 2H), 1.81 – 1.71 (m, 2H), 1.38 – 1.17 (m, 11H).  $^{13}\text{C}$  NMR (100.6 MHz,  $\text{CDCl}_3$ ):  $\delta$  150.5, 139.8, 136.9, 129.0, 128.3, 127.0, 121.1, 115.7 (t,  $J_{\text{C,F}} = 4.3$  Hz), 68.5, 57.6, 54.7, 50.2, 30.3, 29.3 (t,  $J_{\text{C,F}} = 22.3$  Hz), 29.1, 29.0, 28.9, 27.3, 26.4, 9.2.  $^{19}\text{F}$  NMR (376.5 MHz,  $\text{CDCl}_3$ ):  $\delta$  -86.35 (s, F-17), -118.47 (t,  $J_{\text{F,H}} = 17.8$  Hz, F-

16). HRMS (ESI-TOF):  $[M+H]^+$   $m/z$  calcd for  $C_{31}H_{40}F_5N_4O$ : 579.3122; found: 579.3116. FT-IR (ATR)  $\nu$  in  $cm^{-1}$ : 3309, 3028, 2930, 1646, 1455, 1192, 699, 649.

**(1*S*,2*S*)-2-(*N,N'*-dibenzylamino)-1-(1-((*Z*)-10,10,11,11,12,12,12-heptafluorododec-7-en-1-yl)-1*H*-1,2,3-triazol-4-yl)propan-1-ol (12d) and (1*R*,2*S*)-2-(*N,N'*-dibenzylamino)-1-(1-((*Z*)-10,10,11,11,12,12,12-heptafluorododec-7-en-1-yl)-1*H*-1,2,3-triazol-4-yl)propan-1-ol (diast-12d)**: Compound **12d** was prepared following the general procedure for the CuAAC reaction. A solution of  $CuSO_4 \cdot 5H_2O$  (25 mg, 0.098 mmol) in 1.2 mL of  $H_2O$  was added to a mixture of the azide **11d**<sup>4</sup> (0.726 g, 2.22 mmol) and the terminal alkyne **8** (0.550 g, 1.97 mmol) in 6.5 mL of  $CH_2Cl_2$ . Sodium ascorbate (39 mg, 0.197 mmol) in 1.4 mL of  $H_2O$  was then added dropwise and the mixture was stirred for 48 h at room temperature. After the work up, the crude residue was purified by column chromatography (Hexanes:AcOEt 9:1 to 6:4) to give:

**12d** (major): (0.811 g, 1.32 mmol, 67%) as a yellowish oil.  $[\alpha]_D^{25} -15.52$  ( $c$  1.3,  $CHCl_3$ ).  $^1H$  NMR (400 MHz,  $CDCl_3$ ):  $\delta$  7.31 – 7.15 (m, 10H), 7.07 (s, 1H), 5.72 (m, 1H), 5.42 (m, 1H), 4.88 (d,  $J = 6.8$  Hz, 1H), 4.20 (t,  $J = 7.1$  Hz, 2H), 3.78 (br s, 1H), 3.62 (d,  $J = 13.6$  Hz, 2H), 3.40 (d,  $J = 13.6$  Hz, 2H), 3.20 (p,  $J = 6.8$  Hz, 1H), 2.84 (td,  $J = 18.5$  Hz,  $J = 7.2$  Hz, 2H), 2.02 (q,  $J = 6.5$  Hz, 2H), 1.82 – 1.69 (m, 2H), 1.39 – 1.17 (m, 9H).  $^{13}C$  NMR (100.6 MHz,  $CDCl_3$ ):  $\delta$  150.4, 139.6, 136.7, 128.9, 128.1, 126.9, 120.9, 115.5 (t,  $J = 4.2$  Hz), 68.3, 57.4, 54.5, 50.0, 30.0, 29.0 (t,  $J = 22.5$  Hz), 28.7, 28.4, 27.1, 26.2, 9.0.  $^{19}F$  NMR (376.5 MHz,  $CDCl_3$ ):  $\delta$  -80.61 (t,  $J = 9.7$  Hz), -114.05 – -114.26 (m), -127.37 – -127.52 (m). HRMS (ESI-TOF):  $[M+H]^+$   $m/z$  calcd for  $C_{31}H_{38}F_7N_4O$ : 615.2934; found: 615.2928. FT-IR (ATR)  $\nu$  in  $cm^{-1}$ : 3327, 3031, 2931, 1494, 1453, 1218, 1171, 1112, 742, 700.

**Diast-12d (minor)**  $[\alpha]_D^{25} +62.0$  ( $c$  1,  $CHCl_3$ ).  $^1H$  NMR (400 MHz,  $CDCl_3$ ):  $\delta$  7.38 – 7.23 (m, 11H), 5.78 – 5.68 (m, 1H), 5.48 – 5.35 (m, 1H), 4.89 (br s, 1H), 4.73 (d,  $J = 9.9$  Hz, 1H), 4.33 – 4.17 (m, 2H, H-6), 3.92 (d,  $J = 13.3$  Hz, 2H), 3.40 (d,  $J = 13.3$  Hz, 2H), 2.91 – 2.76 (m, 3H), 2.08 – 1.97 (m, 2H), 1.89 – 1.78 (m, 2H), 1.41 – 1.20 (m, 6H), 1.06 (d,  $J = 6.7$  Hz, 3H).  $^{13}C$  NMR (100.6 MHz,  $CDCl_3$ ):  $\delta$  149.4, 138.6, 136.8, 129.0, 128.5, 127.3, 121.0, 115.5 (t,  $J = 4.3$  Hz), 67.3, 59.7, 53.2, 50.1, 30.0, 29.0 (t,  $J = 22.7$  Hz), 28.8, 28.4, 27.1, 26.2, 7.9. HRMS (ESI-TOF):  $[M+H]^+$   $m/z$  calcd for  $C_{31}H_{38}F_7N_4O$ : 615.2934; found: 615.2931. FT-IR (ATR)  $\nu$  in  $cm^{-1}$ : 3340, 3032, 2930, 1653, 1454, 1219, 1170, 1112, 700, 655.

**(1*S*,2*S*)-2-amino-1-(1-(12,12,12-trifluorododecyl)-1*H*-1,2,3-triazol-4-yl)propan-1-ol**

**(1b):** Compound **1b** was prepared following the general procedure for the reduction of *N,N'*-dibenzyl amines, starting from **12b** (0.245 g, 0.451 mmol). The reaction crude was purified by flash chromatography (silica gel, CHCl<sub>3</sub>:MeOH:NH<sub>4</sub>OH 9:1:0.1) to give **1b** as a yellowish waxy solid (0.122 g, 0.334 mmol, 74%).  $[\alpha]_D^{25}$  -6.14 (c 1.2, CHCl<sub>3</sub>). <sup>1</sup>H NMR (400 MHz, CD<sub>3</sub>OD): δ 7.90 (s, 1H), 4.69 (br s, 1H, H-3), 4.40 (t, *J* = 7.1 Hz, 2H), 3.21 (m, 1H), 2.20 – 2.05 (m, 2H), 1.95 – 1.86 (m, 2H), 1.58 – 1.49 (m, 2H), 1.43 – 1.24 (m, 14H), 1.04 (d, *J* = 6.2 Hz, 3H). <sup>13</sup>C NMR (100.6 MHz, CD<sub>3</sub>OD): δ 148.7, 127.5 (q, *J* = 275.4 Hz), 122.6, 70.8, 50.8, 49.9, 33.0 (q, *J* = 28.2 Hz), 29.9, 29.1, 28.9, 28.7, 28.3, 26.1, 21.6 (q, *J* = 2.9 Hz), 16.4. <sup>19</sup>F NMR (376.5 MHz, CDCl<sub>3</sub>): δ -69.55 (t, *J* = 10.5 Hz). HRMS (ESI-TOF): [M+H]<sup>+</sup> *m/z* calcd for C<sub>17</sub>H<sub>32</sub>F<sub>3</sub>N<sub>4</sub>O: 365.2528; found: 365.2525. FT-IR (ATR)  $\nu$  in cm<sup>-1</sup>: 3312, 3141, 2925, 2854, 1559, 1457, 1254, 1139, 1051.

**(1*S*,2*S*)-2-amino-1-(1-(11,11,12,12,12-pentafluorododecyl)-1*H*-1,2,3-triazol-4-**

**yl)propan-1-ol (1c):** Compound **1c** was prepared following the general procedure for the reduction of *N,N'*-dibenzyl amines, starting from **12c** (0.401 g, 0.693 mmol). The reaction crude was purified by flash chromatography (silica gel, CHCl<sub>3</sub>:MeOH:NH<sub>4</sub>OH 9:1:0.1) to give **1c** as a colourless waxy solid (0.250 g, 0.628 mmol, 90%).  $[\alpha]_D^{25}$  +0.899 (c 0.77, CH<sub>3</sub>OH). <sup>1</sup>H NMR (400 MHz, CD<sub>3</sub>OD): δ 7.89 (s, 1H), 4.68 (d, *J*<sub>3,2</sub> = 4.9 Hz, 1H), 4.40 (t, *J*<sub>6,7</sub> = 7.1 Hz, 2H), 3.24 – 3.16 (m, 1H), 2.18 – 2.01 (m, 2H), 1.97 – 1.85 (m, 2H), 1.62 – 1.52 (m, 2H), 1.45 – 1.25 (m, 12H), 1.03 (d, *J* = 6.6 Hz, 3H). <sup>13</sup>C NMR (100.6 MHz, CD<sub>3</sub>OD): δ 150.1, 124.0, 72.2, 52.3, 51.3, 31.4 (t, *J* = 21.9 Hz), 31.3, 30.5, 30.4, 30.3, 30.1, 30.1, 27.5, 21.4 (t, *J* = 3.4 Hz), 17.8. <sup>19</sup>F NMR (376.5 MHz, CD<sub>3</sub>OD): δ -87.04 (s, F-17), -119.51 (t, *J*<sub>F,H</sub> = 18.9 Hz, F-16). HRMS (ESI-TOF): [M+H]<sup>+</sup> *m/z* calcd for C<sub>17</sub>H<sub>30</sub>F<sub>5</sub>N<sub>4</sub>O: 401.2340; found: 401.2346. FT-IR (ATR)  $\nu$  in cm<sup>-1</sup>: 3351, 3292, 2926, 1653, 1472, 1190.

**(1*S*,2*S*)-2-amino-1-(1-(10,10,11,11,12,12,12-heptafluorododecyl)-1*H*-1,2,3-triazol-4-**

**yl)propan-1-ol (1d):** Compound **1d** was prepared following the general procedure for the reduction of *N,N'*-dibenzyl amines, starting from **12d** (0.698 g, 1.162 mmol). The reaction crude was purified by flash chromatography (silica gel, CHCl<sub>3</sub>:MeOH:NH<sub>4</sub>OH 9:1:0.1) to give **1d** as a colourless waxy solid (0.411 g, 0.941 mmol, 81%).  $[\alpha]_D^{25}$  0 (c 0.25, CH<sub>3</sub>OH). <sup>1</sup>H NMR (400 MHz, CD<sub>3</sub>OD): δ 7.89 (s, 1H), 4.67 (d, *J* = 4.9 Hz, 1H), 4.40 (t, *J* = 7.1 Hz, 2H),

3.19 (qd,  $J = 6.6$  Hz,  $J = 4.9$  Hz, 1H), 2.20 – 2.05 (m, 2H), 1.96 – 1.87 (m, 2H), 1.63 – 1.54 (m, 2H), 1.45 – 1.26 (m, 10H), 1.03 (d,  $J = 6.6$  Hz, 3H).  $^{13}\text{C}$  NMR (100.6 MHz,  $\text{CD}_3\text{OD}$ ):  $\delta$  150.1, 124.0, 72.3, 52.3, 51.3, 31.4 (t,  $J = 22.0$  Hz), 31.3, 30.3, 30.2, 30.1, 30.0, 27.5, 21.2 (t,  $J = 3.4$  Hz), 17.9.  $^{19}\text{F}$  NMR (376.5 MHz,  $\text{CD}_3\text{OD}$ ):  $\delta$  -82.28 (t,  $J = 9.9$  Hz), -116.38 – -116.61 (m), -129.13 – -129.17 (m). HRMS (ESI-TOF):  $[\text{M}+\text{H}]^+$   $m/z$  calcd for  $\text{C}_{17}\text{H}_{28}\text{F}_7\text{N}_4\text{O}$ : 437.2151; found: 437.2146. FT-IR (ATR)  $\nu$  in  $\text{cm}^{-1}$ : 3344, 3284, 2938, 2912, 1607, 1468, 1218, 1117.

**(1*S*,2*S*)-2-(dimethylamino)-1-(1-(12,12,12-trifluorododecyl)-1*H*-1,2,3-triazol-4-yl)propan-1-ol (3b):** Compound **1b** (0.020 g, 0.056 mmol) was treated with paraformaldehyde (0.017 g, 0.560 mmol) and  $\text{NaBH}_3\text{CN}$  (0.039 g, 0.616 mmol) following the general procedure for *N,N*-dimethylation of amines. The reaction crude was purified by flash column chromatography (silica gel,  $\text{CHCl}_3$ :MeOH: $\text{NH}_4\text{OH}$  9:1:0.1) to give **3b** as a colourless waxy solid (19.2 mg, 0.049 mmol, 87%).  $[\alpha]_D^{25} +5.11$  (c 0.62,  $\text{CHCl}_3$ ).  $^1\text{H}$  NMR (400 MHz,  $\text{CDCl}_3$ ):  $\delta$  7.52 (s, 1H), 5.12 (d,  $J = 4.0$  Hz, 1H), 4.32 (t,  $J = 7.2$  Hz, 2H), 3.31 (br s, 1H), 2.91 (qd,  $J = 6.8$  Hz,  $J = 4.0$  Hz, 1H), 2.37 (s, 6H), 2.11 – 1.97 (m, 2H), 1.93 – 1.83 (m, 2H), 1.58 – 1.48 (m, 2H), 1.39 – 1.16 (m, 14H), 0.96 (d,  $J = 6.8$  Hz, 3H).  $^{13}\text{C}$  NMR (100.6 MHz,  $\text{CDCl}_3$ ):  $\delta$  149.9, 127.4 (q,  $J = 276.3$  Hz), 121.5, 67.4, 64.0, 50.4, 42.8, 33.8 (q,  $J = 28.2$  Hz), 30.4, 29.5, 29.4, 29.4, 29.3, 29.1, 28.8, 26.6, 21.95 (q,  $J = 2.8$  Hz), 9.8.  $^{19}\text{F}$  NMR (376.5 MHz,  $\text{CDCl}_3$ ):  $\delta$  -66.43 (t,  $J = 10.9$  Hz). HRMS (ESI-TOF):  $[\text{M}+\text{H}]^+$   $m/z$  calcd for  $\text{C}_{19}\text{H}_{36}\text{F}_3\text{N}_4\text{O}$ : 393.2841; found: 393.2843. FT-IR (ATR)  $\nu$  in  $\text{cm}^{-1}$ : 3327, 2925, 2855, 1653, 1457, 1254, 1216, 1135, 1042.

**(1*S*,2*S*)-2-(dimethylamino)-1-(1-(11,11,12,12,12-pentafluorododecyl)-1*H*-1,2,3-triazol-4-yl)propan-1-ol (3c):** Compound **1c** (0.037 g, 0.092 mmol) was treated with paraformaldehyde (0.028 g, 0.92 mmol) and  $\text{NaBH}_3\text{CN}$  (0.0636 g, 1.012 mmol) following the general procedure for *N,N*-dimethylation of amines. The reaction crude was purified by flash column chromatography (silica gel,  $\text{CHCl}_3$ :MeOH: $\text{NH}_4\text{OH}$  9:1:0.1) to give **3c** as a colourless waxy solid (27.1 mg, 0.063 mmol, 69%).  $[\alpha]_D^{25} -2.92$  (c 1.11,  $\text{CHCl}_3$ ).  $^1\text{H}$  NMR (400 MHz,  $\text{CDCl}_3$ ):  $\delta$  7.50 (d,  $J = 0.6$  Hz, 1H), 5.06 (dd,  $J = 4.2$  Hz,  $J = 0.6$  Hz, 1H), 4.32 (t,  $J = 7.2$  Hz, 2H), 3.07 (br s, 1H), 2.83 (qd,  $J = 6.8$  Hz,  $J = 4.2$  Hz, 1H), 2.33 (s, 6H), 2.08 – 1.83 (m, 4H), 1.61 – 1.51 (m, 2H), 1.40 – 1.21 (m, 12H), 0.94 (d,  $J = 6.8$  Hz, 3H).  $^{13}\text{C}$

NMR (100.6 MHz, CDCl<sub>3</sub>):  $\delta$  150.1, 121.4, 67.5, 63.7, 50.4, 42.9, 30.7 (t,  $J = 22.0$  Hz), 30.4, 29.4, 29.3, 29.3, 29.2, 29.1, 26.6, 20.3 (t,  $J = 3.3$  Hz), 10.0. <sup>19</sup>F NMR (376.5 MHz, CDCl<sub>3</sub>):  $\delta$  -85.47 (s), -118.31 (t,  $J = 18.2$  Hz). HRMS (ESI-TOF): [M+H]<sup>+</sup>  $m/z$  calcd for C<sub>19</sub>H<sub>34</sub>F<sub>5</sub>N<sub>4</sub>O: 429.2653; found: 429.2660. FT-IR (ATR)  $\nu$  in cm<sup>-1</sup>: 3333, 2926, 1653, 1458, 1190, 1043.

**(1*S*,2*S*)-2-(dimethylamino)-1-(1-(10,10,11,11,12,12,12-heptafluorododecyl)-1*H*-1,2,3-triazol-4-yl)propan-1-ol (3d)**: Compound **1d** (0.037 g, 0.086 mmol) was treated with paraformaldehyde (0.026 g, 0.86 mmol) and NaBH<sub>3</sub>CN (0.059 g, 0.943 mmol) following the general procedure for *N,N*-dimethylation of amines. The reaction crude was purified by flash column chromatography (silica gel, CHCl<sub>3</sub>:MeOH:NH<sub>4</sub>OH 9:1:0.1) to give **3d** as a colourless waxy solid (29.4 mg, 0.063 mmol, 74%).  $[\alpha]_D^{25} +8.01$  (c 0.9, CHCl<sub>3</sub>). <sup>1</sup>H NMR (400 MHz, CDCl<sub>3</sub>):  $\delta$  7.50 (s, 1H), 5.06 (d,  $J = 4.2$  Hz, 1H), 4.33 (t,  $J = 7.2$  Hz, 2H), 2.83 (qd,  $J = 6.8$  Hz,  $J = 4.2$  Hz, 1H), 2.33 (s, 6H), 2.11 – 1.95 (m, 2H), 1.94 – 1.84 (m, 2H), 1.62 – 1.52 (m, 2H), 1.40 – 1.20 (m, 10H), 0.94 (d,  $J = 6.8$  Hz, 3H). <sup>13</sup>C NMR (100.6 MHz, CDCl<sub>3</sub>):  $\delta$  150.1, 121.4, 67.5, 63.7, 50.4, 42.9, 30.7 (t,  $J = 22.4$  Hz), 30.4, 29.3, 29.2, 29.1, 29.0, 26.5, 20.2 (t,  $J = 3.6$  Hz), 10.0. HRMS (ESI-TOF): [M+H]<sup>+</sup>  $m/z$  calcd for C<sub>19</sub>H<sub>32</sub>F<sub>7</sub>N<sub>4</sub>O: 465.2464; found: 465.2452. FT-IR (ATR)  $\nu$  in cm<sup>-1</sup>: 3311, 2926, 1653, 1457, 1219, 1169, 1117.

***N,N'*-bis(*tert*-butoxycarbonyl)-1-((1*S*,2*S*)-1-(1-(12,12,12-trifluorododecyl)-1*H*-1,2,3-triazol-4-yl)-1-hydroxypropan-2-yl)guanidine (15b)**: Compound **15b** was obtained following the general procedure for the guanidination of amines starting from **1b** (30 mg, 0.083 mmol) was treated with *N,N'*-di-Boc-1*H*-pyrazole-1-carboxiamidine (**14**) (29 mg, 0.091 mmol) following the general procedure for guanidination of amines. The reaction crude was purified by flash chromatography (silica gel, hexane:ethyl acetate 8:2→1:1) to give **15b** (45 mg, 0.075 mmol, 90%) as a white solid.  $[\alpha]_D^{25} -43.6$  (c 1, CHCl<sub>3</sub>). <sup>1</sup>H NMR (400 MHz, CDCl<sub>3</sub>):  $\delta$  11.42 (s, 1H), 8.38 (d,  $J = 6.8$  Hz, 1H), 7.52 (s, 1H), 6.52 (br s, 1H), 5.06 (d,  $J = 1.9$  Hz, 1H), 4.50 (pd,  $J = 6.8$  Hz,  $J = 1.9$  Hz, 1H), 4.31 (t,  $J = 7.2$  Hz, 2H), 2.11 – 1.97 (m, 2H), 1.91 – 1.82 (m, 2H), 1.58 – 1.45 (m, 20H), 1.36 – 1.21 (m, 17H). <sup>13</sup>C NMR (100.6 MHz, CDCl<sub>3</sub>):  $\delta$  162.7, 157.1, 152.9, 148.8, 127.4 (q,  $J = 276.2$  Hz), 121.8, 83.7, 79.8, 72.0, 53.2, 50.4, 33.8 (q,  $J = 28.3$  Hz), 30.4, 29.5, 29.4, 29.4, 29.3, 29.1, 28.8, 28.3, 28.1, 26.6, 22.0 (q,  $J = 2.9$  Hz), 16.0. <sup>19</sup>F NMR (376.5 MHz, CDCl<sub>3</sub>):  $\delta$  -66.71 (t,  $J = 10.5$  Hz). HRMS (ESI-

TOF):  $[M+H]^+$   $m/z$  calcd for  $C_{28}H_{50}F_3N_6O_5$ : 607.3795; found: 607.3794. FT-IR (ATR)  $\nu$  in  $cm^{-1}$ : 3283, 2986, 2934, 1719, 1651, 1469, 1251, 1129.

***N,N'*-bis(*tert*-butoxycarbonyl)-1-((1*S*,2*S*)-1-(1-(12,12,12,11,11-pentafluorododecyl)-1*H*-1,2,3-triazol-4-yl)-1-hydroxypropan-2-yl)guanidine (15c)**: Compound **1c** (0.056 g, 0.139 mmol) was treated with *N,N'*-di-Boc-1*H*-pyrazole-1-carboxiamidine (**14**) (0.049 g, 0.153 mmol) following the general procedure for guanidination of amines. The reaction crude was purified by flash chromatography (silica gel, hexane:ethyl acetate 8:2→1:1) to give **15c** (0.074 g, 0.115 mmol, 83%) as a white foam.  $[\alpha]_D^{25}$  -48.8 (c 1.03,  $CHCl_3$ ).  $^1H$  NMR (400 MHz,  $CDCl_3$ ):  $\delta$  11.41 (s, 1H, NH), 8.36 (d,  $J = 6.8$  Hz, 1H), 7.51 (s, 1H), 6.49 (br s, 1H), 5.04 (d,  $J = 1.9$  Hz, 1H), 4.49 (pd,  $J = 6.8$  Hz,  $J = 1.9$  Hz, 1H), 4.30 (t,  $J = 7.2$  Hz, 2H), 2.05 – 1.79 (m, 4H), 1.60 – 1.49 (m, 2H), 1.45 (s, 18H), 1.38 – 1.19 (m, 15H).  $^{13}C$  NMR (100.6 MHz,  $CDCl_3$ ):  $\delta$  162.6, 157.0, 152.9, 148.8, 121.7, 83.7, 79.7, 71.9, 53.1, 50.4, 30.7 (t,  $J = 22.1$  Hz), 30.3, 29.3, 29.3, 29.2, 29.1, 29.0, 28.3, 28.1, 26.5, 20.3 (t,  $J = 3.4$  Hz), 15.9.  $^{19}F$  NMR (376.5 MHz,  $CDCl_3$ ):  $\delta$  -81.88 (s), -114.73 (t,  $J = 18.4$  Hz). HRMS (ESI-TOF):  $[M+H]^+$   $m/z$  calcd for  $C_{28}H_{48}F_5N_6O_5$ : 643.3606; found: 643.3601. FT-IR (ATR)  $\nu$  in  $cm^{-1}$ : 3283, 2988, 2924, 1719, 1652, 1611, 1585, 1471, 1194, 1166, 1050.

***N,N'*-bis(*tert*-butoxycarbonyl)-1-((1*S*,2*S*)-1-(1-(12,12,12,11,11,10,10-heptafluorododecyl)-1*H*-1,2,3-triazol-4-yl)-1-hydroxypropan-2-yl)guanidine (15d)**: Compound **1d** (0.036 g, 0.082 mmol) was treated with *N,N'*-di-Boc-1*H*-pyrazole-1-carboxiamidine (**14**) (0.029 g, 0.902 mmol) following the general procedure for guanidination of amines. The reaction crude was purified by flash chromatography (silica gel, hexane:ethyl acetate 8:2→1:1) to give **15d** (0.051 g, 0.076 mmol, 92%) as a white foam.  $[\alpha]_D^{25}$  -33.3 (c 0.73,  $CHCl_3$ ).  $^1H$  NMR (400 MHz,  $CDCl_3$ ):  $\delta$  11.42 (s, 1H), 8.38 (d,  $J = 6.7$  Hz, 1H), 7.52 (s, 1H), 6.51 (br s, 1H), 5.06 (d,  $J = 1.9$  Hz, 1H), 4.50 (pd,  $J = 6.7$  Hz,  $J = 1.9$  Hz, 1H), 4.32 (t,  $J = 7.3$  Hz, 2H), 2.10 – 1.94 (m, 2H), 1.92 – 1.83 (m, 2H), 1.64 – 1.43 (m, 20H), 1.39 – 1.22 (m, 13H).  $^{13}C$  NMR (100.6 MHz,  $CDCl_3$ ):  $\delta$  162.7, 157.1, 152.9, 148.9, 121.8, 83.7, 79.8, 72.0, 53.2, 50.4, 30.7 (t,  $J = 22.3$  Hz), 30.3, 29.2, 29.2, 29.1, 29.0, 28.3, 28.1, 26.5, 20.1 (t,  $J = 3.6$  Hz), 16.0.  $^{19}F$  NMR (376.5 MHz,  $CDCl_3$ ):  $\delta$  -77.36 (t,  $J = 9.6$  Hz), -112.16 (m), -124.62 (br s). HRMS (ESI-TOF):  $[M+H]^+$   $m/z$  calcd for  $C_{28}H_{46}F_7N_6O_5$ :

679.3418; found: 679.3408. FT-IR (ATR)  $\nu$  in  $\text{cm}^{-1}$ : 3283, 2978, 2921, 1718, 1652, 1457, 1129, 1119.

**1-((1*S*,2*S*)-1-(1-(12,12,12-trifluorododecyl)-1*H*-1,2,3-triazol-4-yl)-1-hydroxypropan-2-yl) guanidinium trifluoroacetate salt (4b):** Compound **4b** was prepared following the general procedure for the Boc deprotection of the protected guanidino derivatives starting from **15b** (35 mg, 0.058 mmol). The reaction crude was purified by flash chromatography (silica gel,  $\text{CHCl}_3$ :MeOH: $\text{NH}_4\text{OH}$  9:1:0.1 to  $\text{CHCl}_3$ :MeOH: $\text{NH}_4\text{OH}$  7:3:0.3) to give **4b** (27 mg, 0.042 mmol, 72%) as a white wax.  $[\alpha]_D^{25}$   $-6.7$  (c 0.4,  $\text{CH}_3\text{OH}$ ).  $^1\text{H}$  NMR (400 MHz,  $\text{CD}_3\text{OD}$ ):  $\delta$  7.93 (s, 1H), 4.91 – 4.89 (m, 1H), 4.41 (t,  $J = 7.1$  Hz, 2H), 3.98 (qd,  $J = 6.7$  Hz,  $J = 3.9$  Hz, 1H), 2.19 – 2.05 (m, 2H), 1.95 – 1.86 (m, 2H), 1.58 – 1.49 (m, 2H), 1.42 – 1.24 (m, 14H), 1.14 (d,  $J = 6.7$  Hz, 3H).  $^{13}\text{C}$  NMR (100.6 MHz,  $\text{CD}_3\text{OD}$ ):  $\delta$  158.6, 149.3, 128.91 (q,  $J = 275.3$  Hz), 124.2, 70.3, 53.7, 51.4, 34.38 (q,  $J = 28.3$  Hz), 31.3, 30.5, 30.5, 30.3, 30.1, 29.7, 27.4, 23.02 (q,  $J = 2.9$  Hz), 15.7.  $^{19}\text{F}$  NMR (376.5 MHz,  $\text{CD}_3\text{OD}$ ):  $\delta$   $-68.04$  (t,  $J = 10.9$  Hz),  $-76.97$  (s). HRMS (ESI-TOF):  $[\text{M}]^+$   $m/z$  calcd for  $\text{C}_{18}\text{H}_{34}\text{F}_3\text{N}_6\text{O}^+$ : 407.2741; found: 407.2748. FT-IR (ATR)  $\nu$  in  $\text{cm}^{-1}$ : 3347, 3178, 2928, 1669, 1463, 1203, 1137, 1054.

**1-((1*S*,2*S*)-1-(1-(11,11,12,12,12-pentafluorododecyl)-1*H*-1,2,3-triazol-4-yl)-1-hydroxypropan-2-yl) guanidinium trifluoroacetate salt (4c):** Compound **4c** was prepared following the general procedure for the Boc deprotection of the protected guanidino derivatives starting from **15c** (63 mg, 0.098 mmol). The reaction crude was purified by flash chromatography (silica gel,  $\text{CHCl}_3$ :MeOH: $\text{NH}_4\text{OH}$  9:1:0.1 to  $\text{CHCl}_3$ :MeOH: $\text{NH}_4\text{OH}$  7:3:0.3) to give **4c** (44 mg, 0.066 mmol, 67%) as a colourless syrup.  $[\alpha]_D^{25}$   $-17.54$  (c 0.23,  $\text{CH}_3\text{OH}$ ).  $^1\text{H}$  NMR (400 MHz,  $\text{CD}_3\text{OD}$ ):  $\delta$  7.98 (d,  $J = 0.4$  Hz, 1H), 4.93 (dd,  $J = 3.9$  Hz,  $J = 0.4$  Hz, 1H), 4.41 (t,  $J = 7.1$  Hz, 2H), 3.98 (qd,  $J = 6.7$  Hz,  $J = 3.9$  Hz, 1H), 2.17 – 2.01 (m, 2H), 1.95 – 1.86 (m, 2H), 1.62 – 1.52 (m, 2H), 1.44 – 1.25 (m, 12H), 1.13 (d,  $J = 6.7$  Hz, 3H).  $^{13}\text{C}$  NMR (100.6 MHz,  $\text{CD}_3\text{OD}$ ):  $\delta$  158.6, 149.3, 124.4, 70.4, 53.7, 51.4, 31.4 (t,  $J = 21.9$  Hz), 31.4, 30.5, 30.4, 30.3, 30.1, 30.1, 27.5, 21.4 (t,  $J = 3.5$  Hz), 15.6.  $^{19}\text{F}$  NMR (376.5 MHz,  $\text{CD}_3\text{OD}$ ):  $\delta$   $-77.01$  (s),  $-87.04$  (s),  $-119.52$  (t,  $J = 18.9$  Hz). HRMS (ESI-TOF):  $[\text{M}]^+$   $m/z$  calcd for  $\text{C}_{18}\text{H}_{32}\text{F}_5\text{N}_6\text{O}^+$ : 443.2558; found: 443.2552. FT-IR (ATR)  $\nu$  in  $\text{cm}^{-1}$ : 3336, 2944, 2851, 1653, 1457, 1196, 1014.

**1-((1S,2S)-1-(1-(10,10,11,11,12,12,12-heptafluorododecyl)-1H-1,2,3-triazol-4-yl)-1-hydroxypropan-2-yl) guanidinium trifluoroacetate salt (4d):** Compound **4d** was prepared following the general procedure for the Boc deprotection of the protected guanidino derivatives starting from **15d** (35 mg, 0.052 mmol). The reaction crude was purified by flash chromatography (silica gel, CHCl<sub>3</sub>:MeOH:NH<sub>4</sub>OH 9:1:0.1 to CHCl<sub>3</sub>:MeOH:NH<sub>4</sub>OH 7:3:0.3) to give **4d** (24 mg, 0.033 mmol, 65%) as a white waxy solid.  $[\alpha]_D^{25} - 7.2$  (c 0.66, CH<sub>3</sub>OH). <sup>1</sup>H NMR (400 MHz, CD<sub>3</sub>OD): δ 7.93 (d, *J* = 0.5 Hz, 1H), 4.90 (dd, *J* = 3.9 Hz, *J* = 0.5 Hz, 1H), 4.41 (t, *J* = 7.0 Hz, 2H), 3.98 (qd, *J* = 6.8 Hz, *J* = 3.9 Hz, 1H), 2.20 – 2.04 (m, 2H), 1.96 – 1.86 (m, 2H), 1.64 – 1.53 (m, 2H), 1.46 – 1.25 (m, 10H), 1.14 (d, *J* = 6.8 Hz, 3H). <sup>19</sup>F NMR (376.5 MHz, CD<sub>3</sub>OD): δ -76.98 (s), -82.27 (t, *J*<sub>17,16</sub> = 10.0 Hz, 3F, F-17), -116.39 – -116.61 (m, 2F, F-16), -129.12 – -129.18 (m, 2F, F-15). HRMS (ESI-TOF): [M]<sup>+</sup> *m/z* calcd for C<sub>18</sub>H<sub>30</sub>F<sub>7</sub>N<sub>6</sub>O<sup>+</sup>: 479.2364; found: 479.2378. FT-IR (ATR)  $\nu$  in cm<sup>-1</sup>: 3447, 3354, 2929, 1647, 1636, 1472, 1218.

**(1S,2S)-2-(methylamino)-1-(1-(12,12,12-trifluorododecyl)-1H-1,2,3-triazol-4-yl)propan-1-ol (2b):** Compound **2b** was prepared from amine **1b** (40 mg, 0.111 mmol), following the general procedure for the monomethylation of amines. The crude product was purified by flash chromatography (silica gel, CHCl<sub>3</sub>:MeOH:NH<sub>4</sub>OH 9:1:0.1) to give **2b** (28.3 mg, 0.075 mmol, 68 %) as a colourless waxy solid.  $[\alpha]_D^{25} - 1.89$  (c 0.74, CHCl<sub>3</sub>). <sup>1</sup>H NMR (400 MHz, CD<sub>3</sub>OD): δ 7.87 (d, *J* = 0.5 Hz, 1H), 4.92 (dd, *J* = 4.2 Hz, *J* = 0.5 Hz, 1H), 4.39 (t, *J* = 7.1 Hz, 2H), 2.96 (qd, *J* = 6.6 Hz, *J* = 4.2 Hz, 1H), 2.44 (s, 3H), 2.20 – 2.05 (m, 2H), 1.90 (p, *J* = 7.1 Hz, 2H), 1.58 – 1.49 (m, 2H), 1.42 – 1.27 (m, 14H), 1.00 (d, *J* = 6.6 Hz, 3H). <sup>13</sup>C NMR (100.6 MHz, CD<sub>3</sub>OD): δ 150.7, 128.9 (q, *J* = 275.4 Hz), 123.9, 69.0, 60.3, 51.3, 34.4 (q, *J* = 28.2 Hz), 33.6, 31.3, 30.5, 30.5, 30.5, 30.3, 30.1, 29.8, 27.5, 23.0 (q, *J* = 3.0 Hz). <sup>19</sup>F NMR (376.5 MHz, CD<sub>3</sub>OD) δ -68.02 (t, *J* = 11.3 Hz). HRMS (ESI-TOF): [M+H]<sup>+</sup> *m/z* calcd for C<sub>18</sub>H<sub>34</sub>F<sub>3</sub>N<sub>4</sub>O: 379.2685; found: 379.2691. FT-IR (ATR)  $\nu$  in cm<sup>-1</sup>: 3326, 2925, 1653, 1457, 1254, 1138.

**(1S,2S)-2-(methylamino)-1-(1-(11,11,12,12,12-pentafluorododecyl)-1H-1,2,3-triazol-4-yl)propan-1-ol (2c):** Compound **2c** was prepared from amine **1c** (44 mg, 0.110 mmol), following the general procedure for the monomethylation of amines. The crude product was purified by flash chromatography (silica gel, CHCl<sub>3</sub>:MeOH:NH<sub>4</sub>OH



9:1:0.1) to give **2c** (38 mg, 0.091 mmol, 83 %) as a colourless waxy solid.  $[\alpha]_D^{25} -0.6$  (c 0.31, CHCl<sub>3</sub>). <sup>1</sup>H NMR (400 MHz, CD<sub>3</sub>OD): δ 7.87 (s, 1H), 4.92 – 4.90 (m, 2H), 4.39 (t, *J* = 7.1 Hz, 2H), 2.94 (qd, *J* = 6.6 Hz, *J* = 4.2 Hz, 1H), 2.42 (s, 3H), 2.17 – 2.01 (m, 2H), 1.95 – 1.86 (m, 2H), 1.62 – 1.52 (m, 2H), 1.44 – 1.26 (m, 12H), 1.00 (d, *J* = 6.6 Hz, 3H). <sup>13</sup>C NMR (100.6 MHz, CD<sub>3</sub>OD): δ 150.8, 123.9, 69.2, 60.3, 51.3, 33.7, 31.4 (t, *J* = 21.9 Hz), 31.3, 30.5, 30.4, 30.3, 30.1, 30.0, 27.5, 21.4 (t, *J* = 3.3 Hz), 14.2. <sup>19</sup>F NMR (376.5 MHz, CD<sub>3</sub>OD): δ -87.04 (s), -119.49 (t, *J* = 18.9 Hz). HRMS (ESI-TOF): [M+H]<sup>+</sup> *m/z* calcd for C<sub>18</sub>H<sub>32</sub>F<sub>5</sub>N<sub>4</sub>O: 415.2496; found: 415.2501. FT-IR (ATR) ν in cm<sup>-1</sup>: 3309, 2924, 2855, 1558, 1457, 1191.

**(1*S*,2*S*)-1-(1-(10,10,11,11,12,12,12-heptafluorododecyl)-1*H*-1,2,3-triazol-4-yl)-2-**

**(methylamino)propan-1-ol (2d):** Compound **2d** was prepared from amine **1d** (46 mg, 0.105 mmol, 1 equiv.), following the general procedure for the monomethylation of amines. The crude product was purified by flash chromatography (silica gel, CHCl<sub>3</sub>:MeOH:NH<sub>4</sub>OH 9:1:0.1) to give **2d** (28.0 mg, 0.062 mmol, 59%) as a colourless waxy solid.  $[\alpha]_D^{25} -0.26$  (c 0.9, CHCl<sub>3</sub>). <sup>1</sup>H NMR (400 MHz, CD<sub>3</sub>OD): δ 7.87 (s, 1H), 4.92 – 4.90 (m, 1H), 4.40 (t, *J* = 7.1 Hz, 2H), 2.95 (qd, *J* = 6.6 Hz, *J* = 4.2 Hz, 1H), 2.43 (s, 3H), 2.21 – 2.05 (m, 2H), 1.96 – 1.87 (m, 2H), 1.64 – 1.54 (m, 2H), 1.45 – 1.26 (m, 10H), 1.00 (d, *J* = 6.6 Hz, 3H). <sup>13</sup>C NMR (100.6 MHz, CD<sub>3</sub>OD): δ 150.8, 123.9, 69.1, 60.3, 51.3, 33.6, 31.4 (t, *J* = 22.0 Hz), 31.3, 30.3, 30.2, 30.1, 30.0, 27.4, 21.2 (t, *J* = 3.7 Hz), 14.1. HRMS (ESI-TOF): [M+H]<sup>+</sup> *m/z* calcd for C<sub>18</sub>H<sub>30</sub>F<sub>7</sub>N<sub>4</sub>O: 451.2308; found: 451.2312. FT-IR (ATR) ν in cm<sup>-1</sup>: 3297, 3147, 2927, 2919, 1653, 1466, 1224, 1132, 1050.

#### 4. $^1\text{H}$ , $^{13}\text{C}$ and $^{19}\text{F}$ spectra

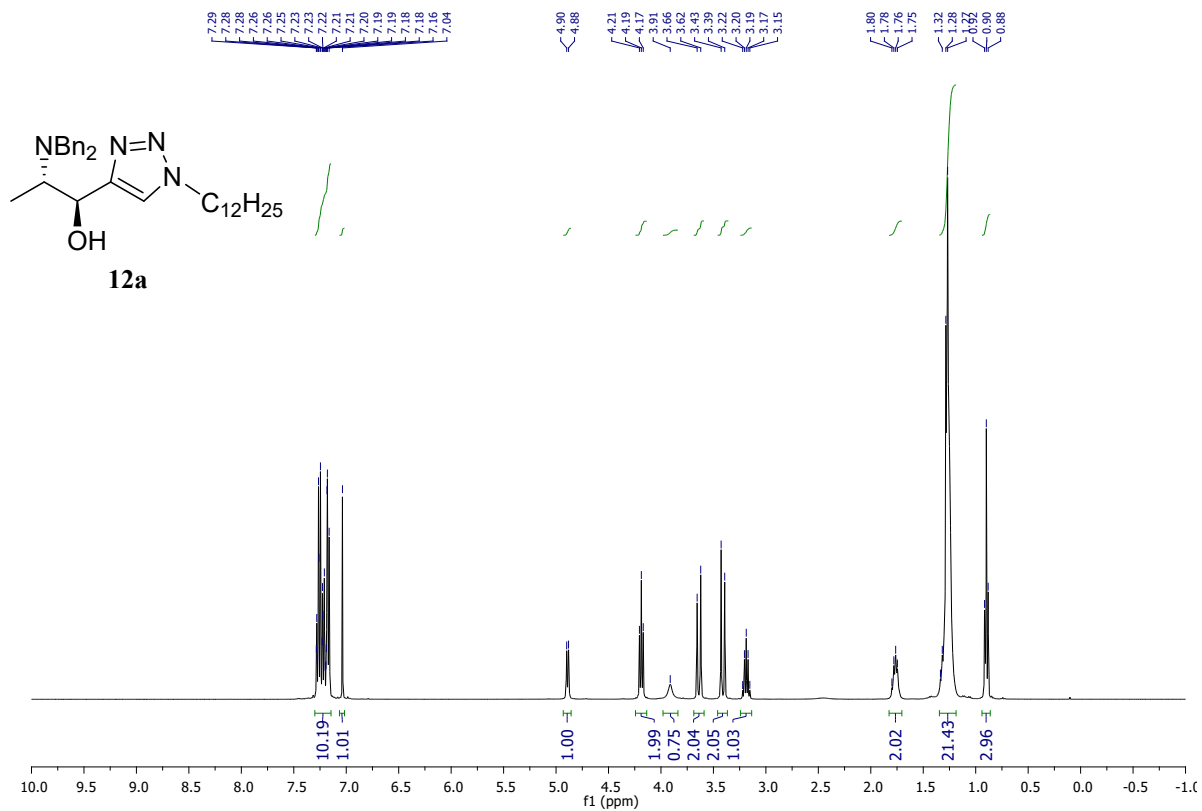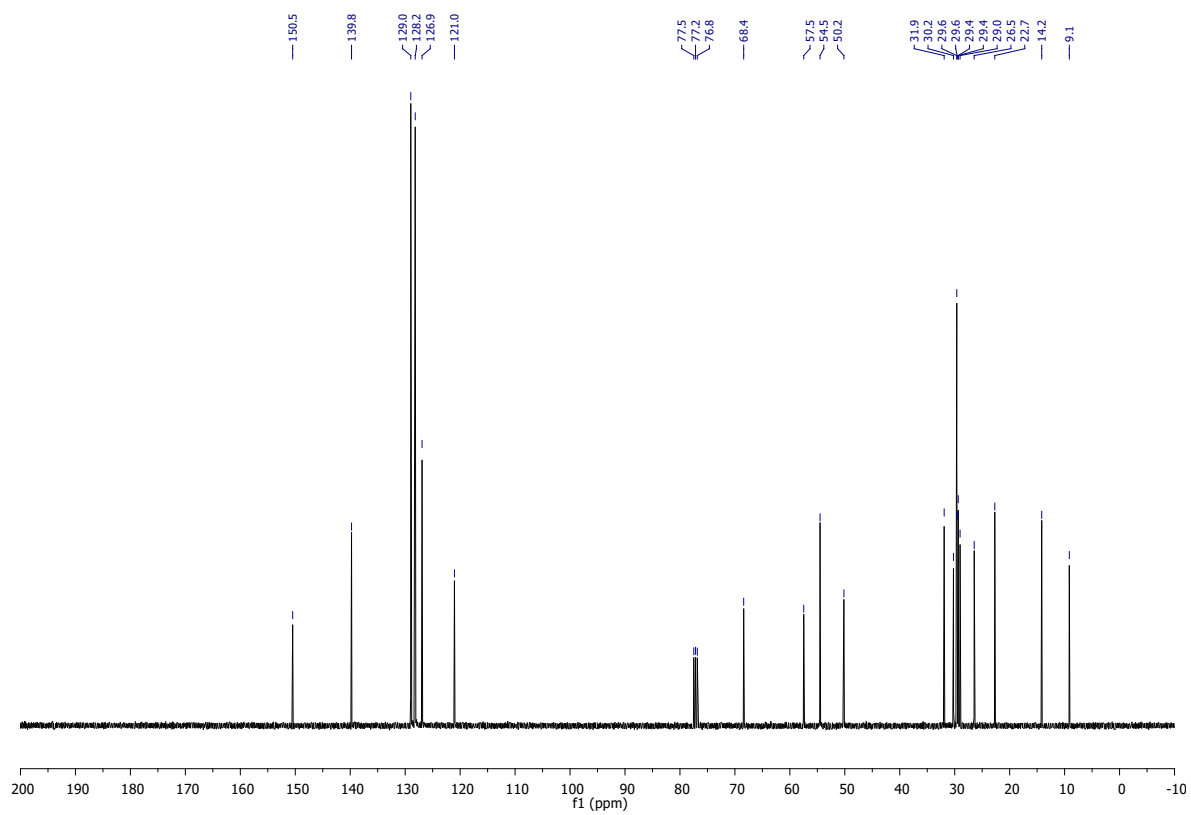

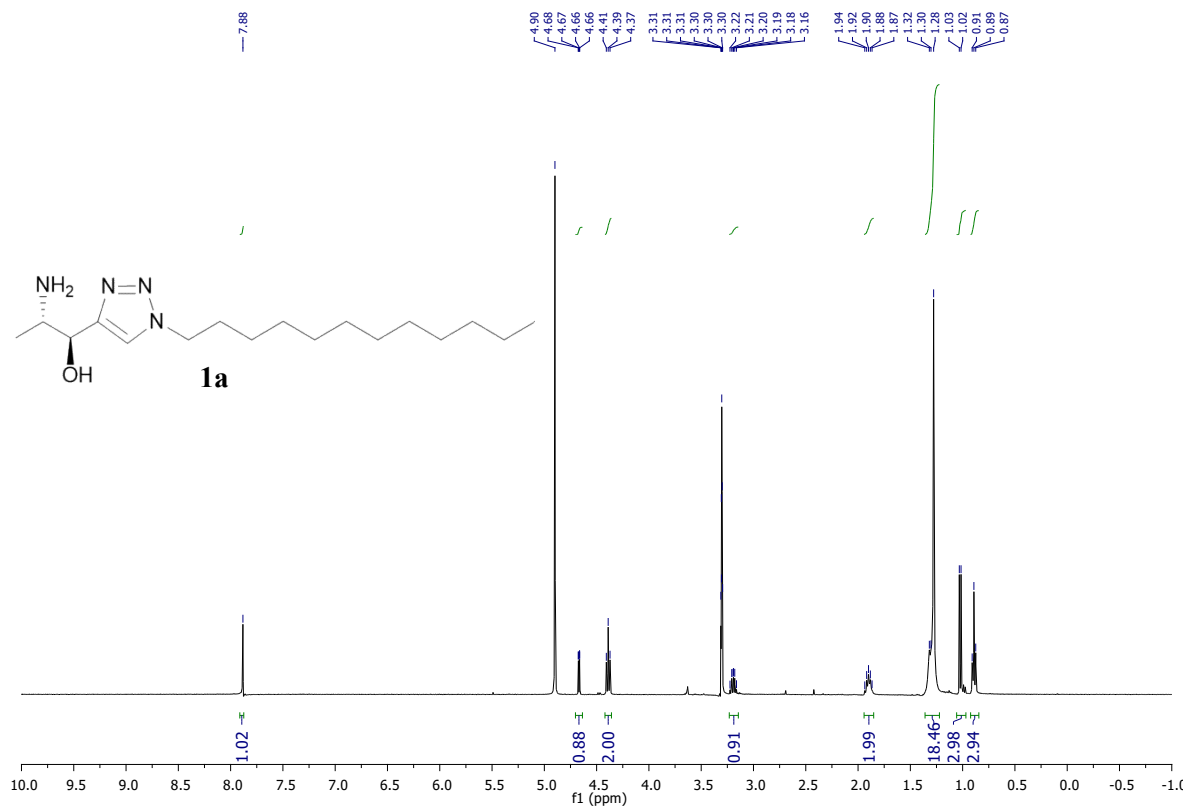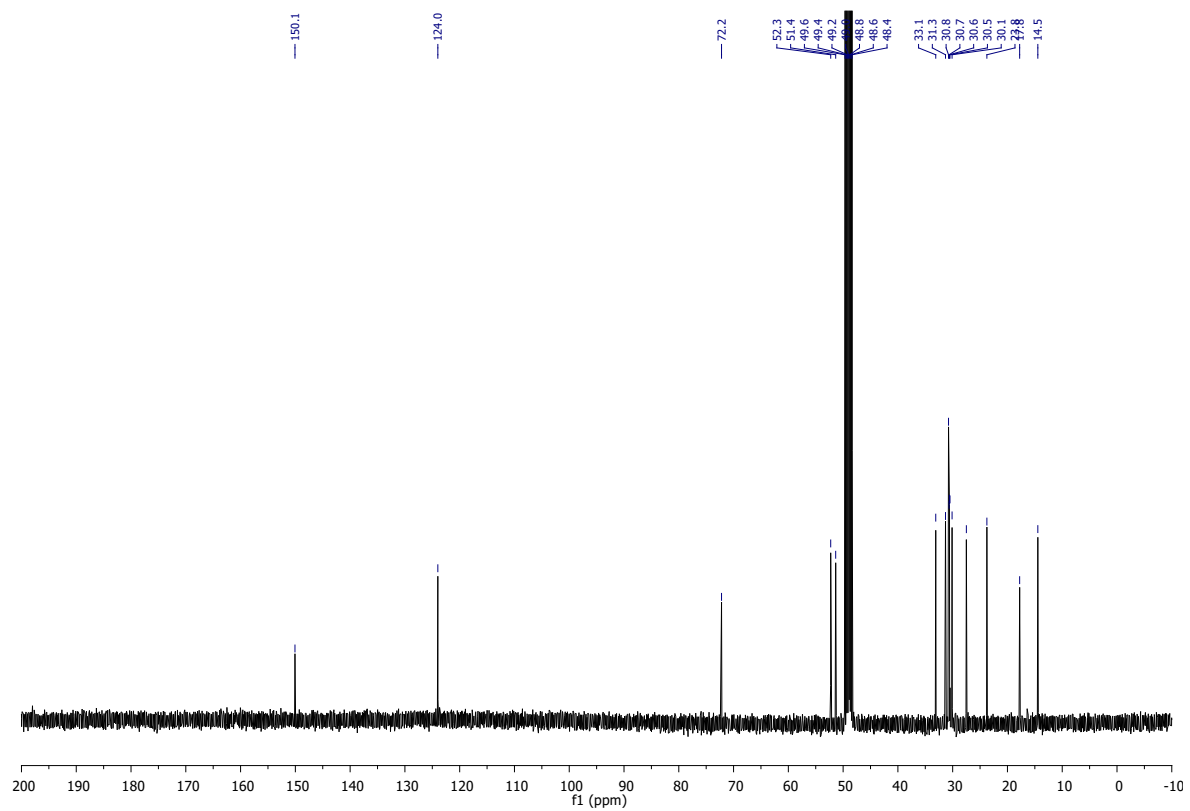

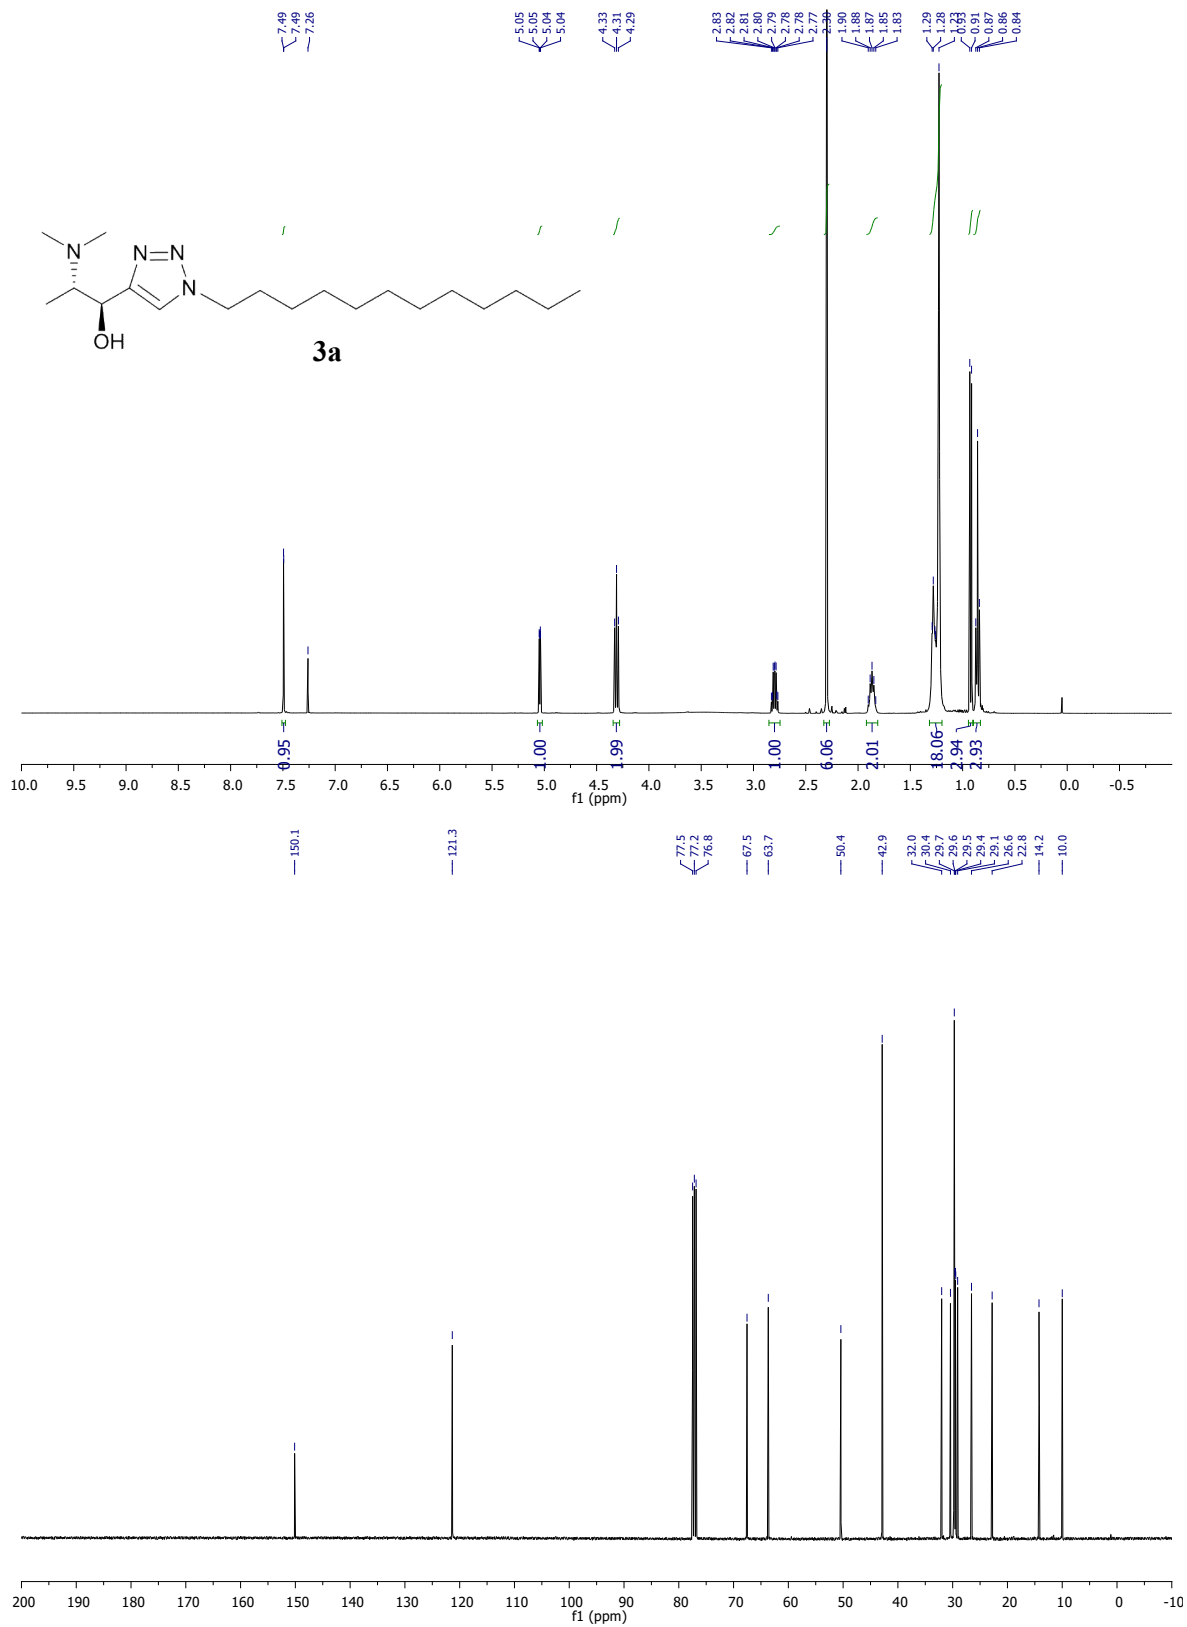

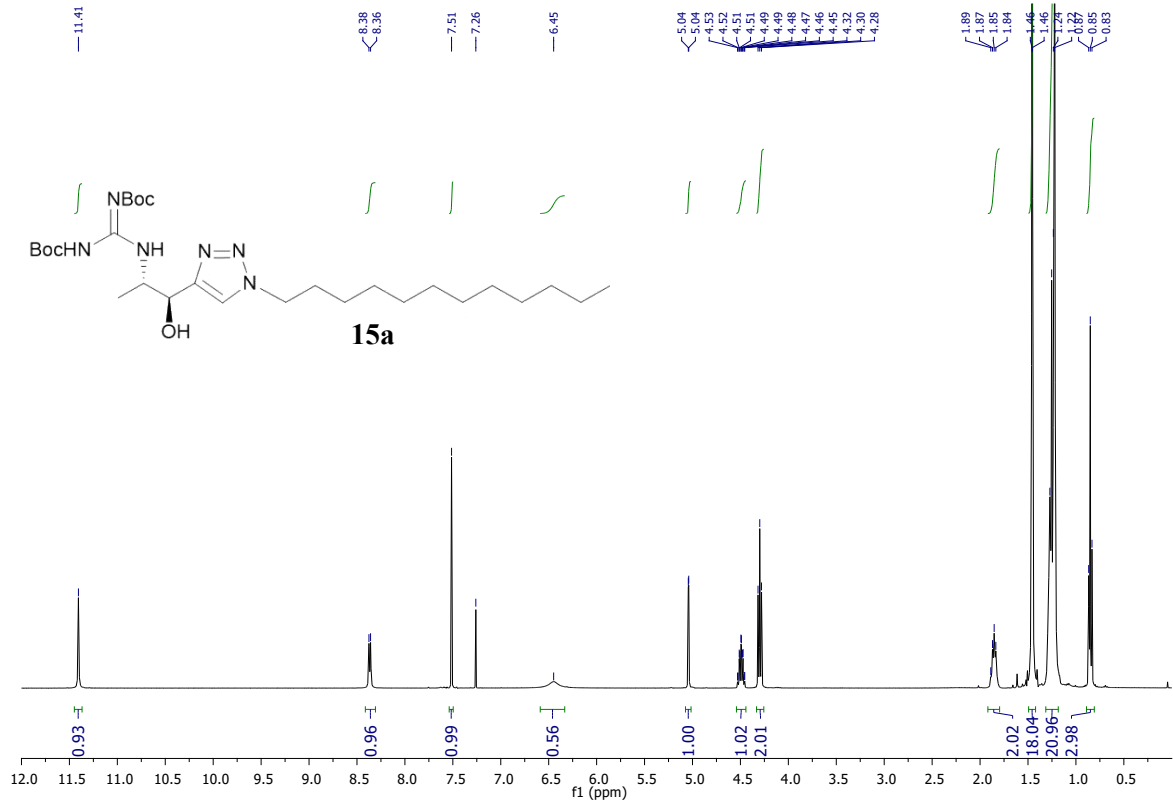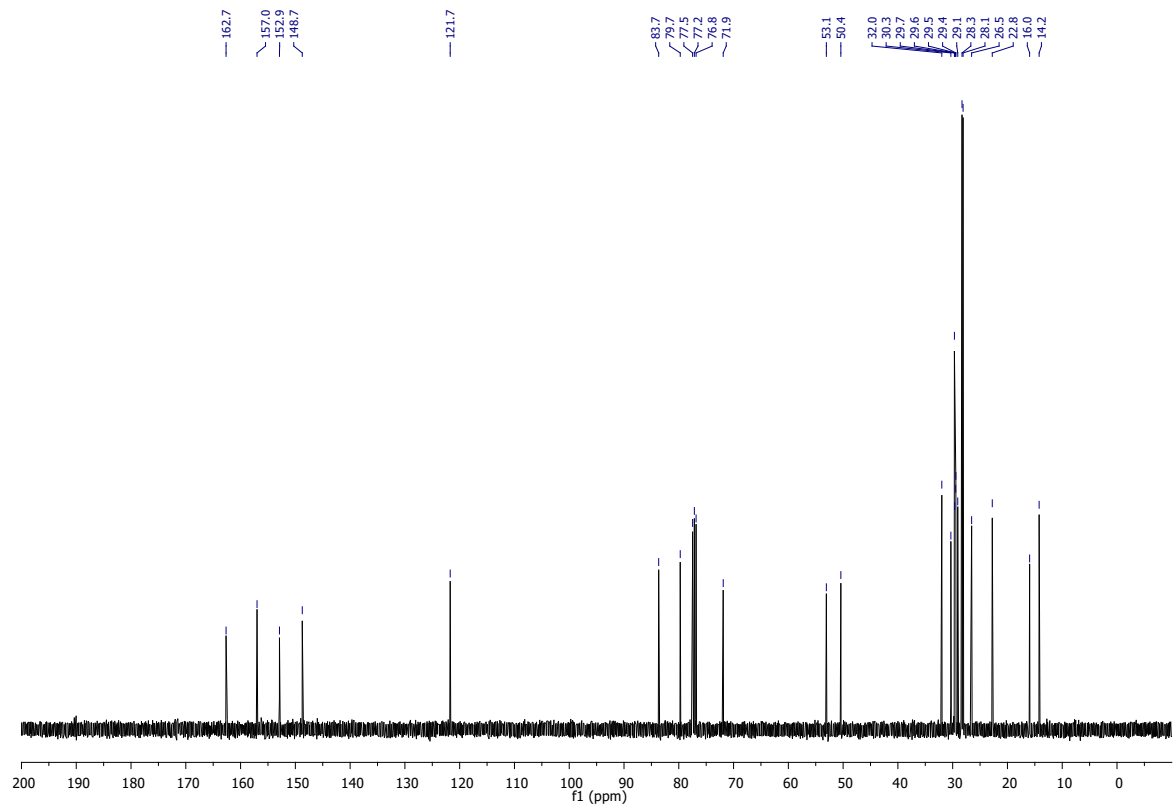

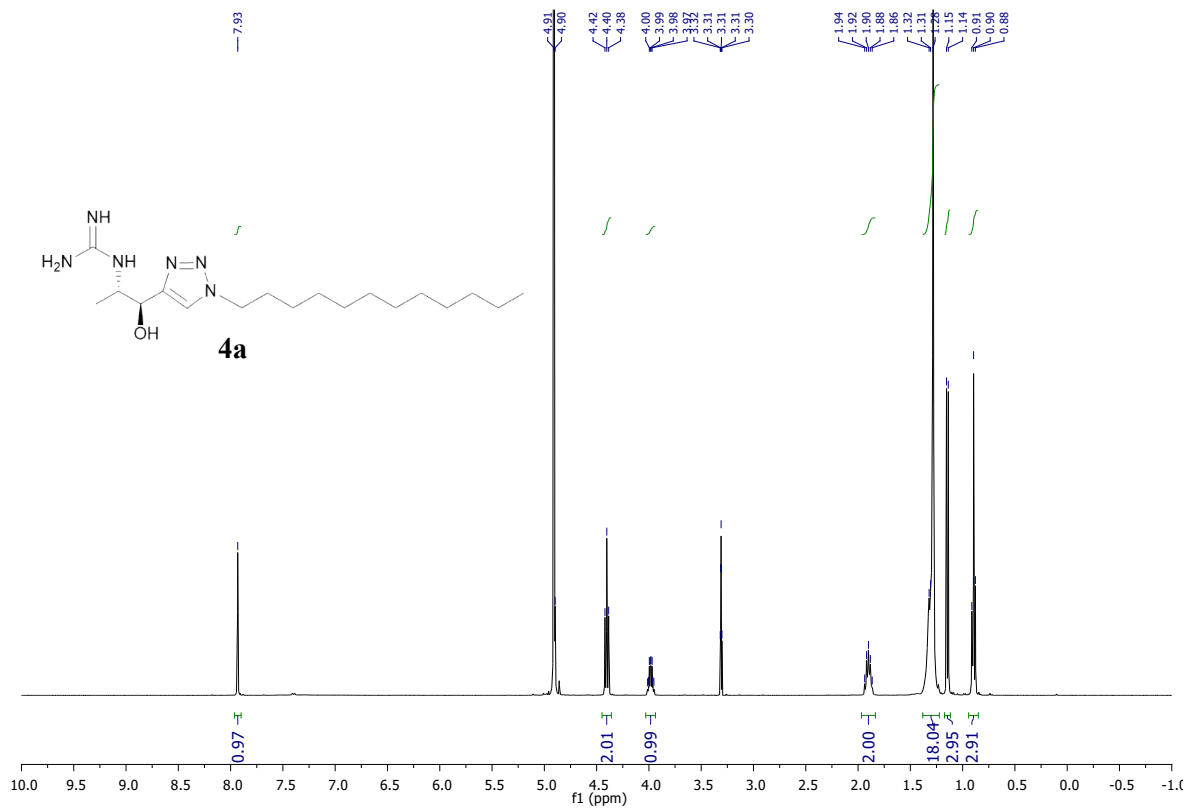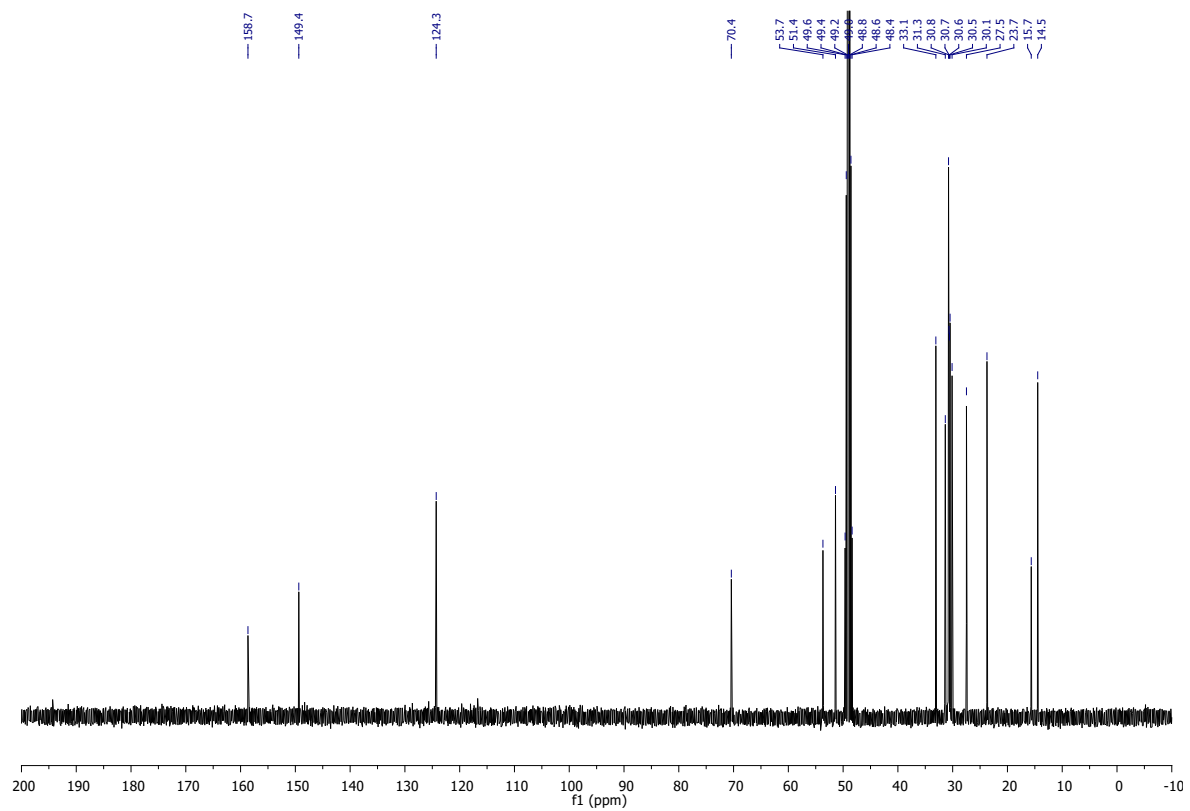

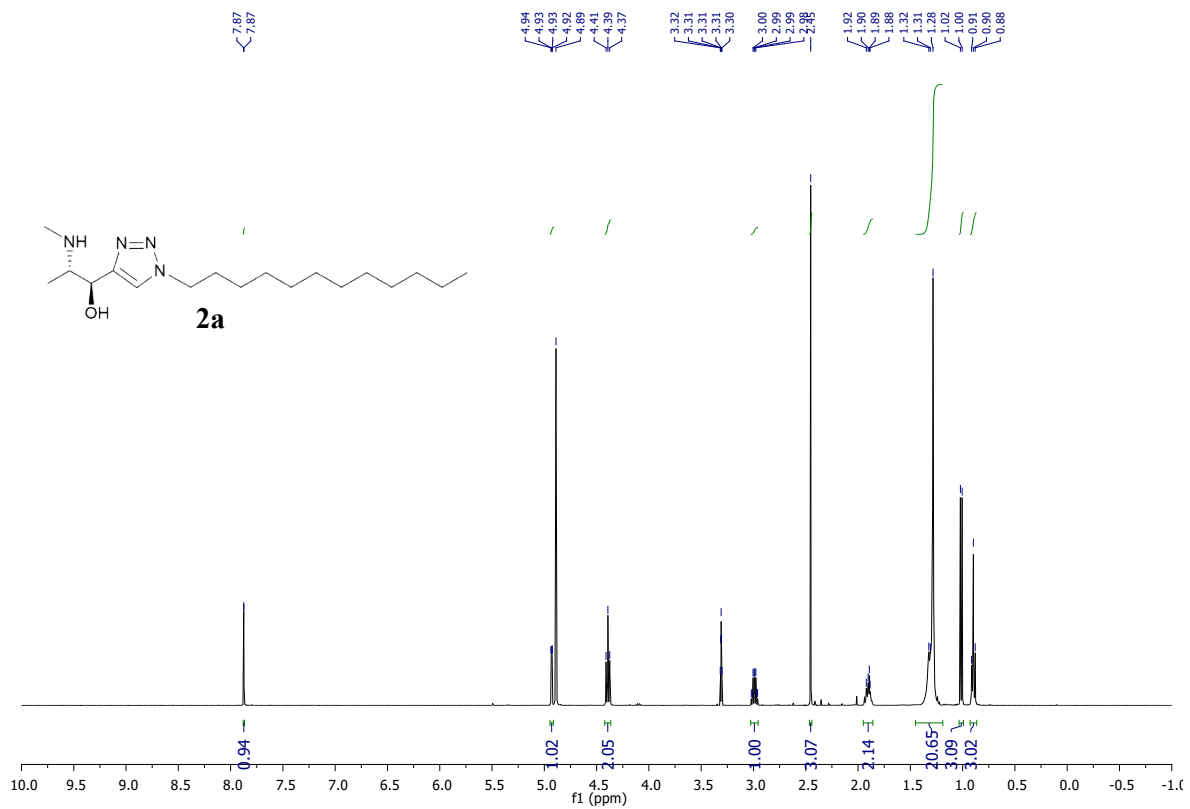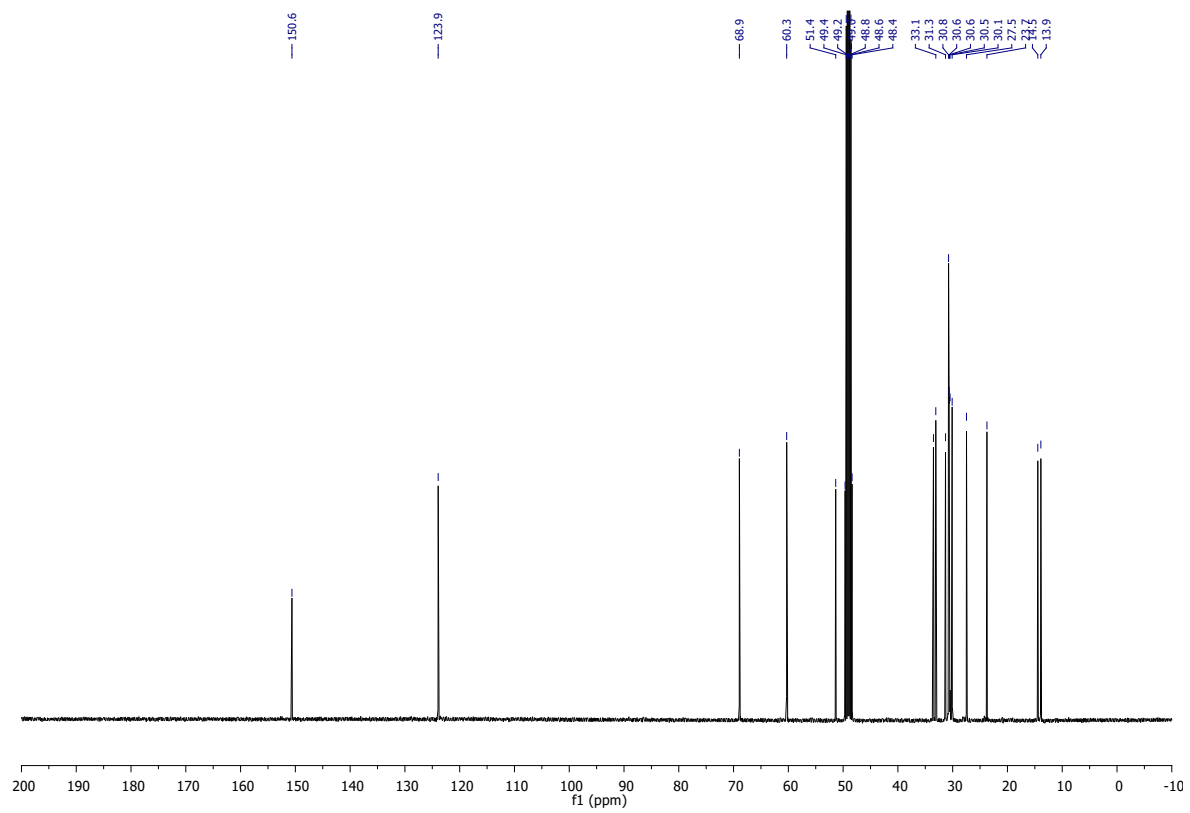



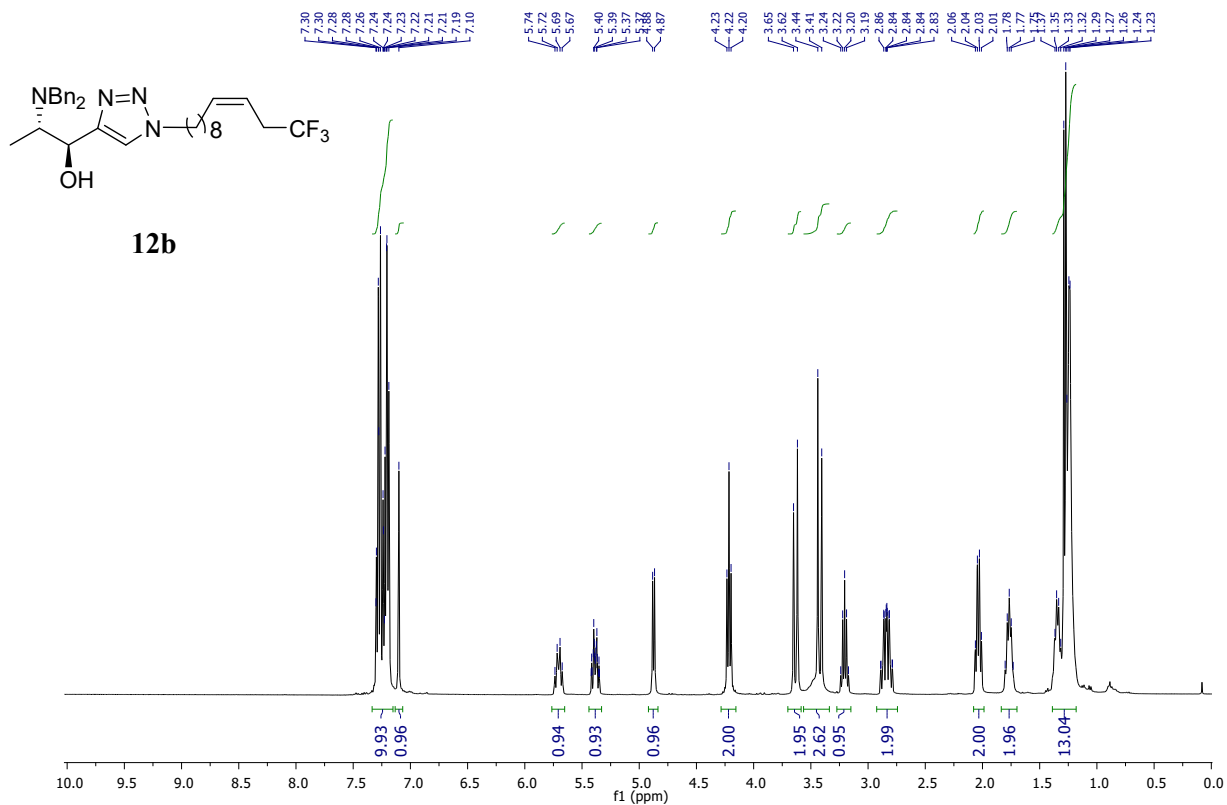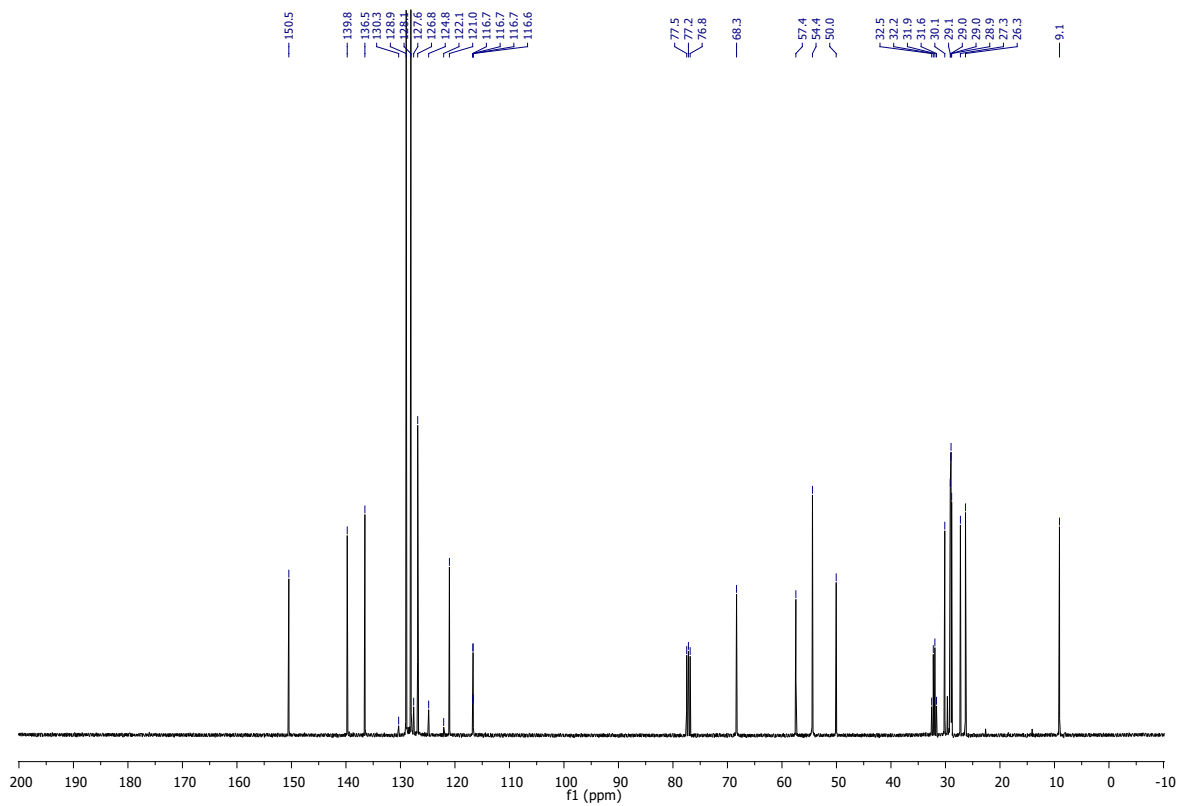

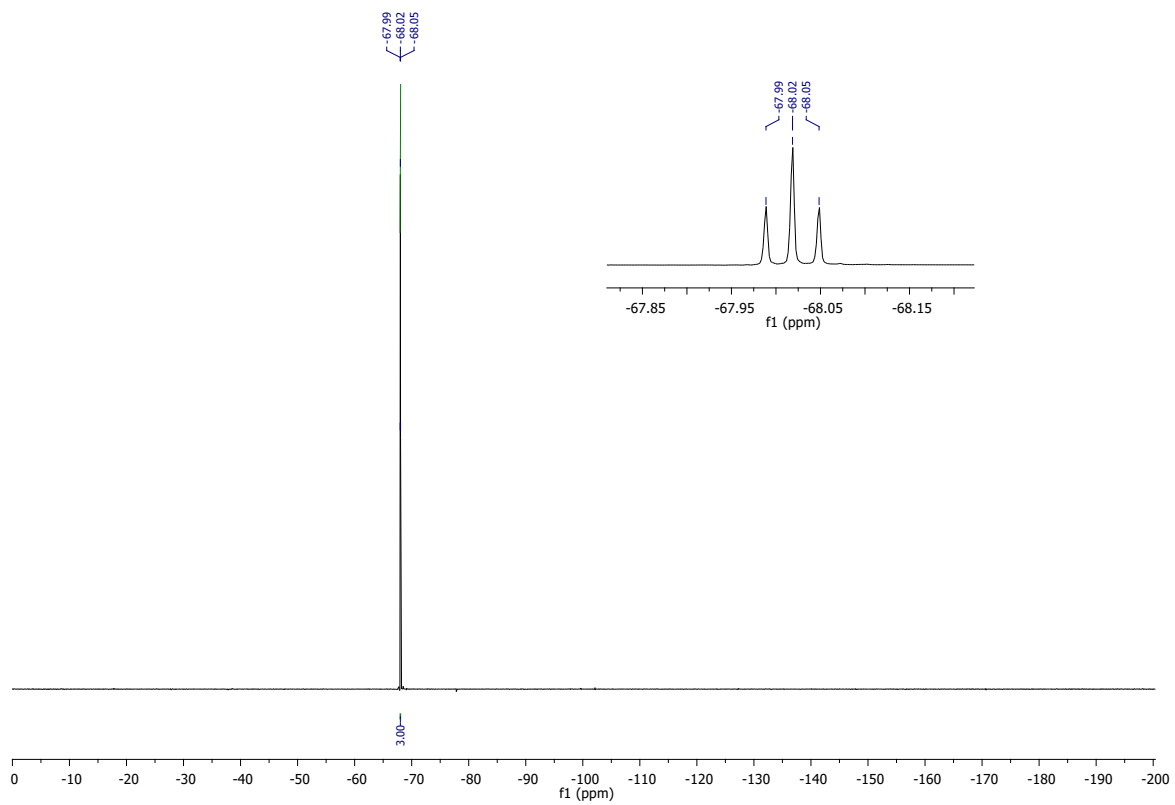

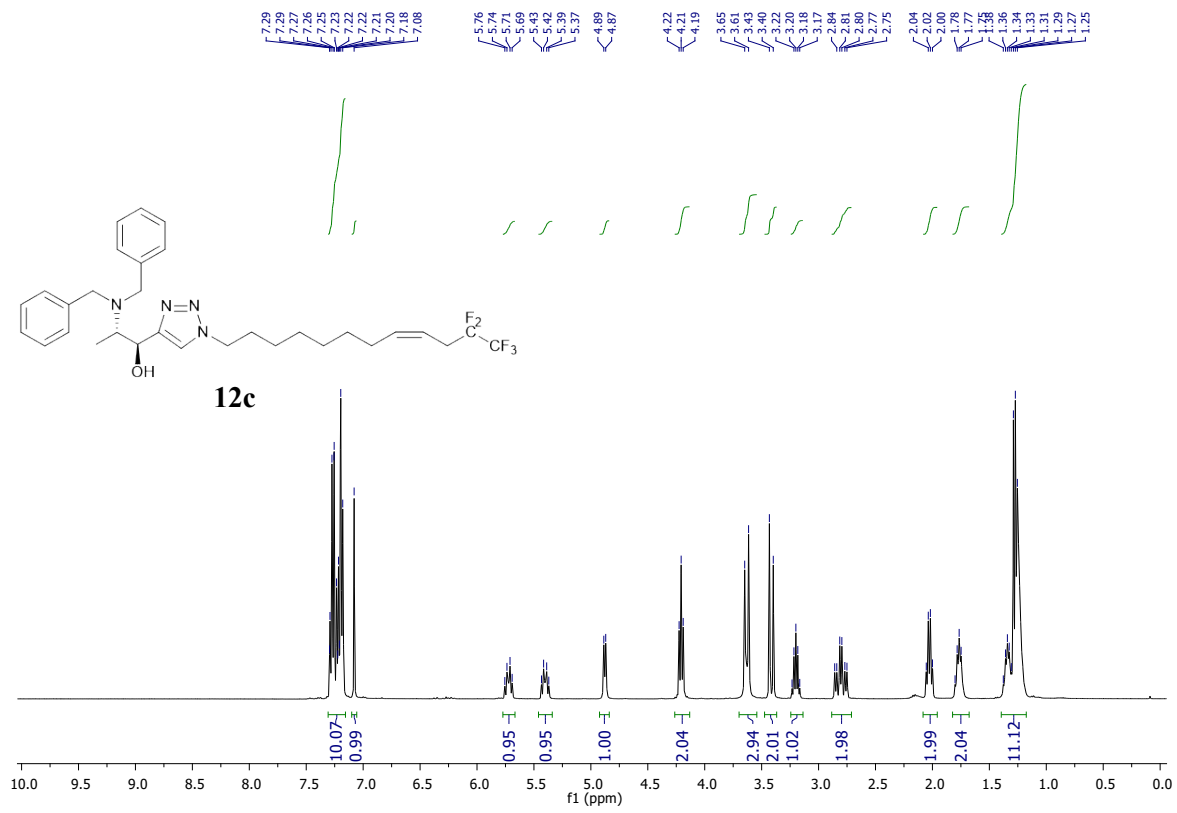

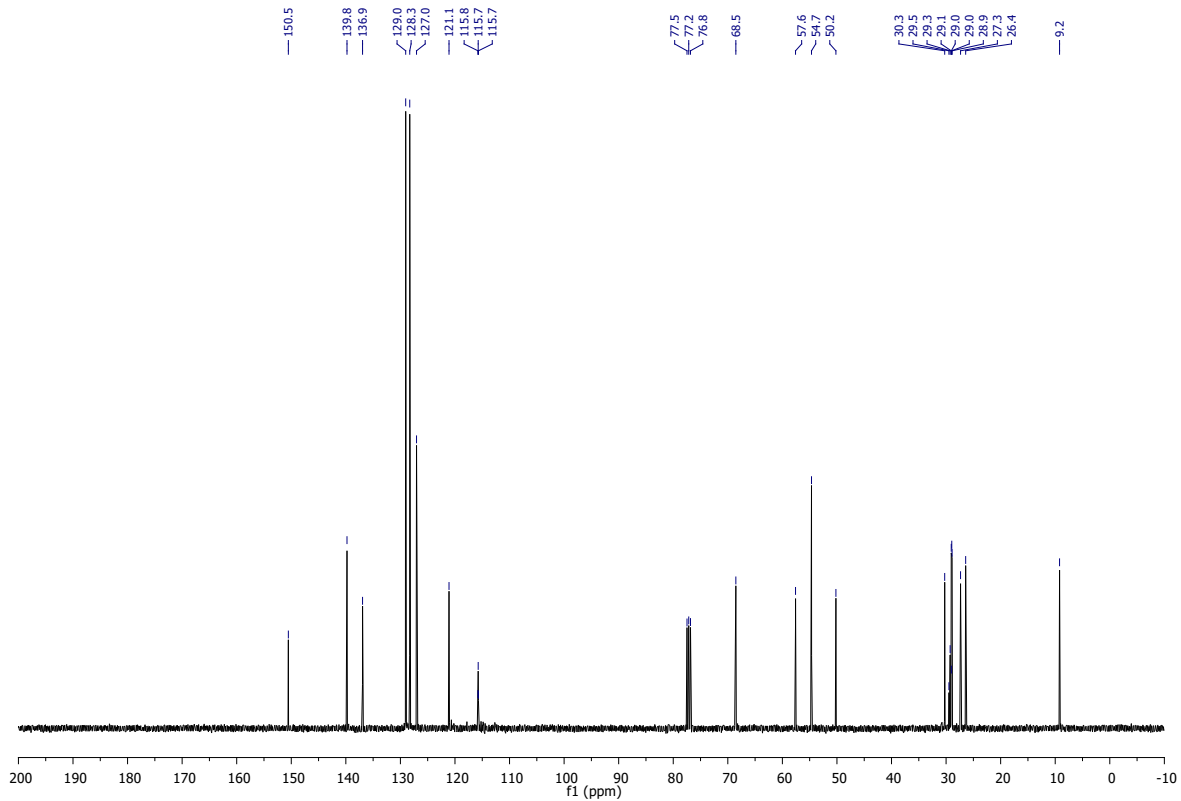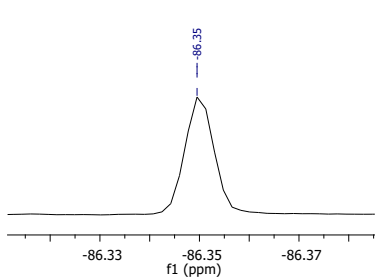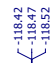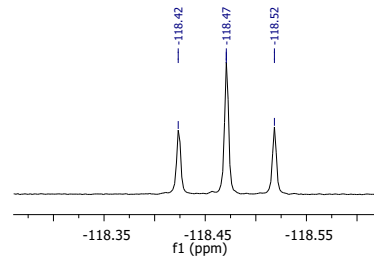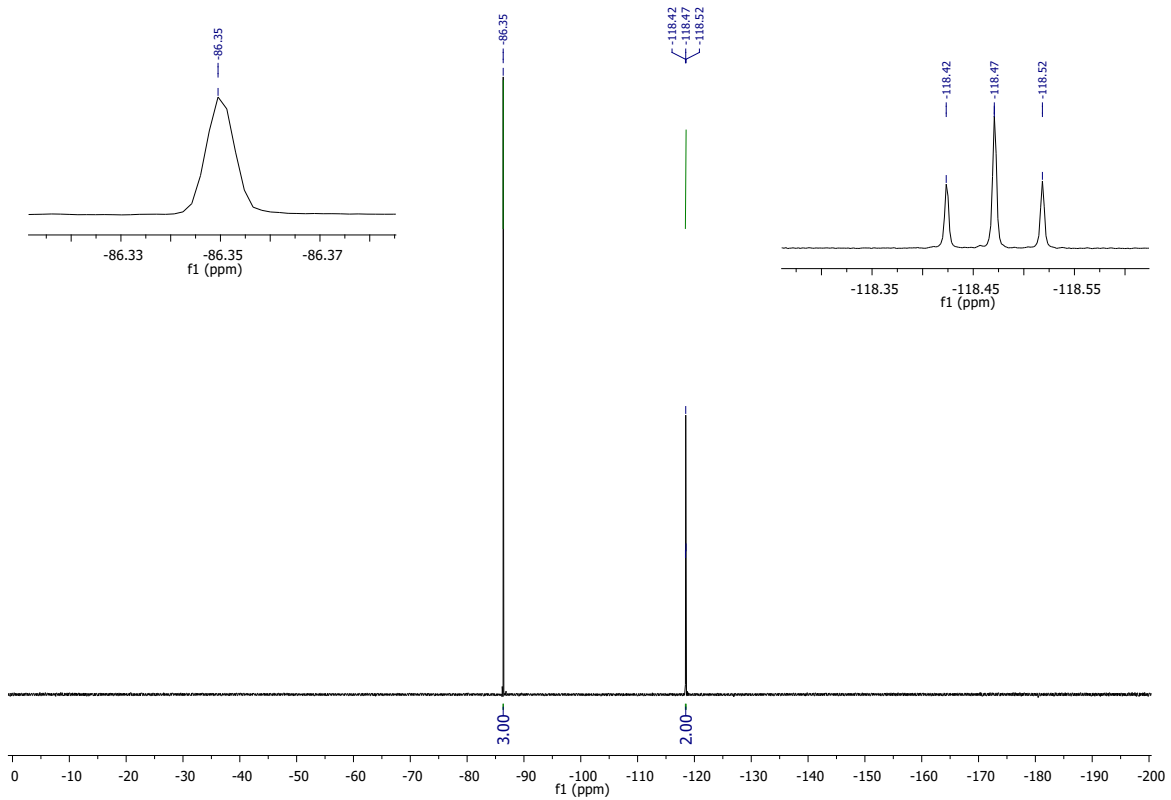

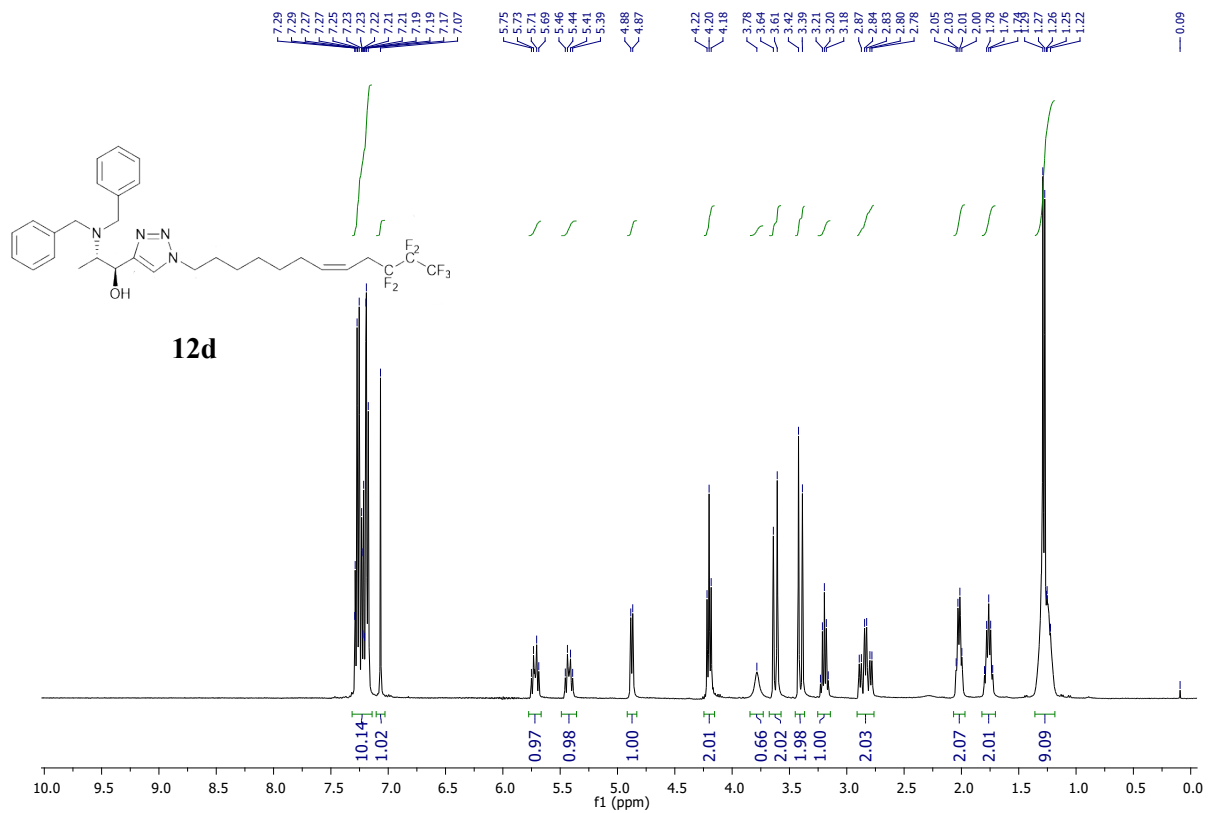

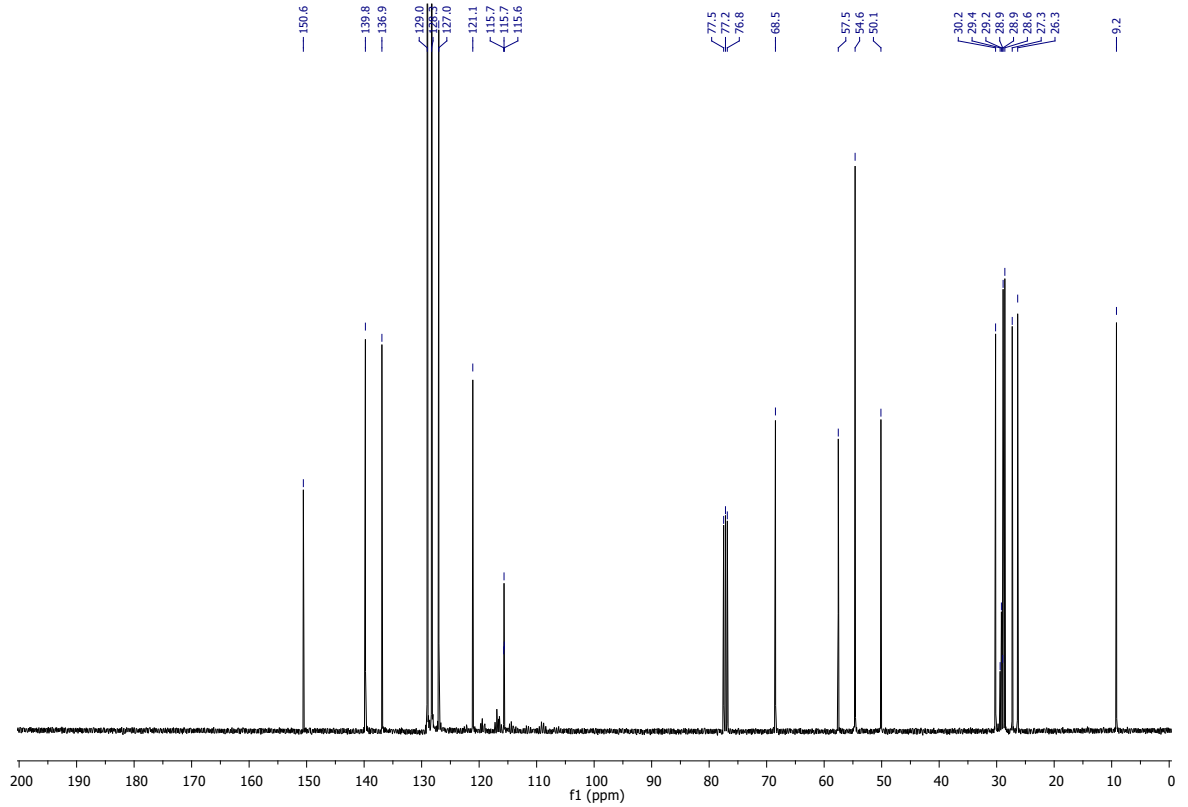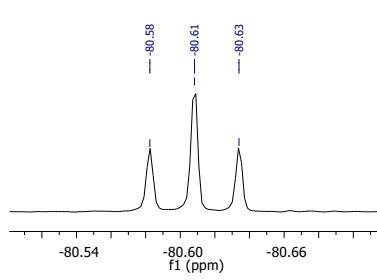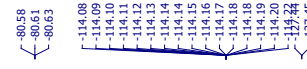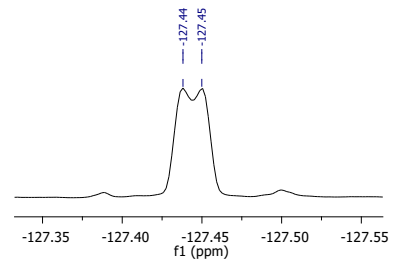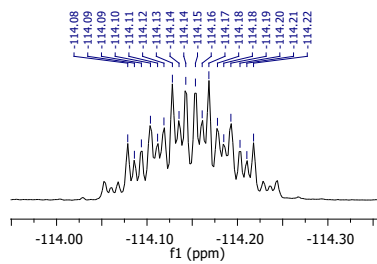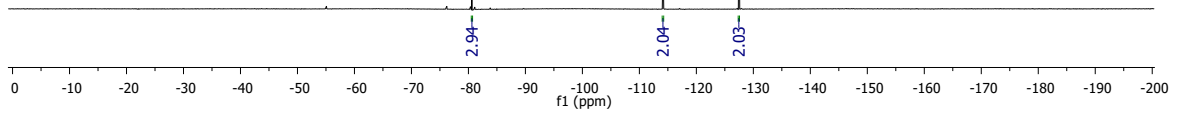

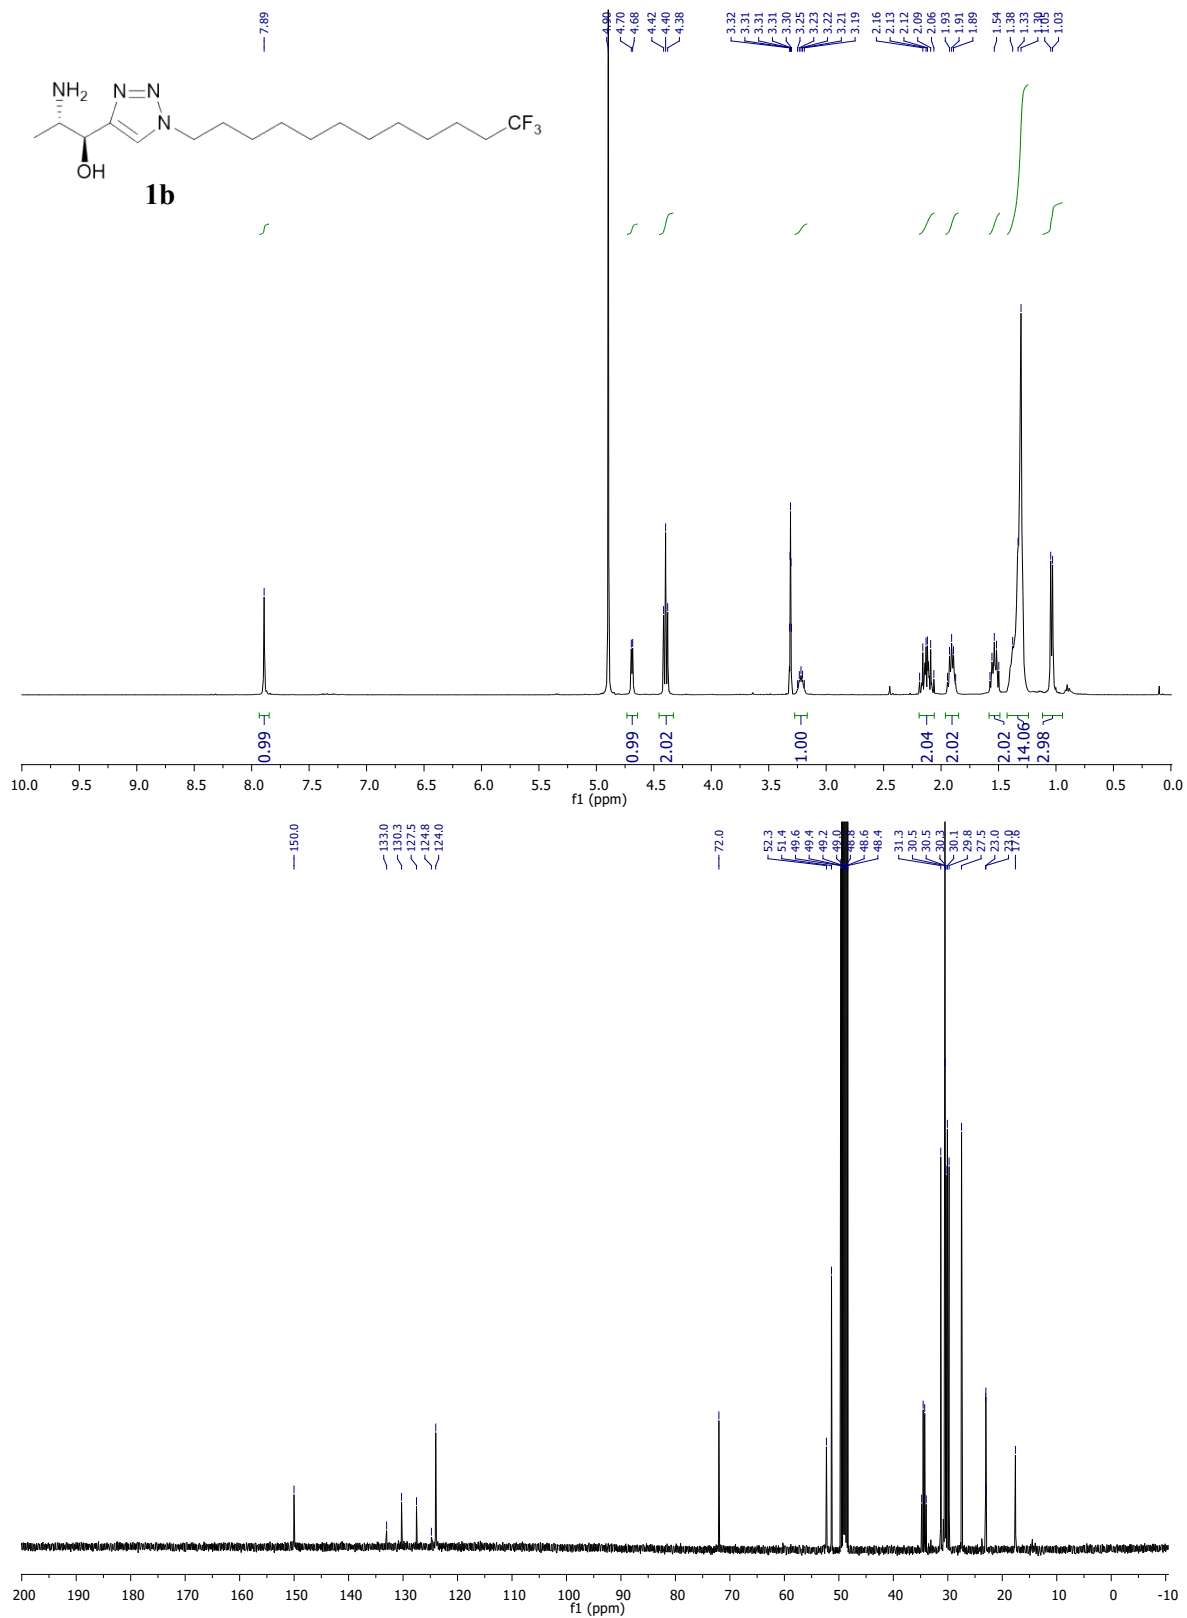

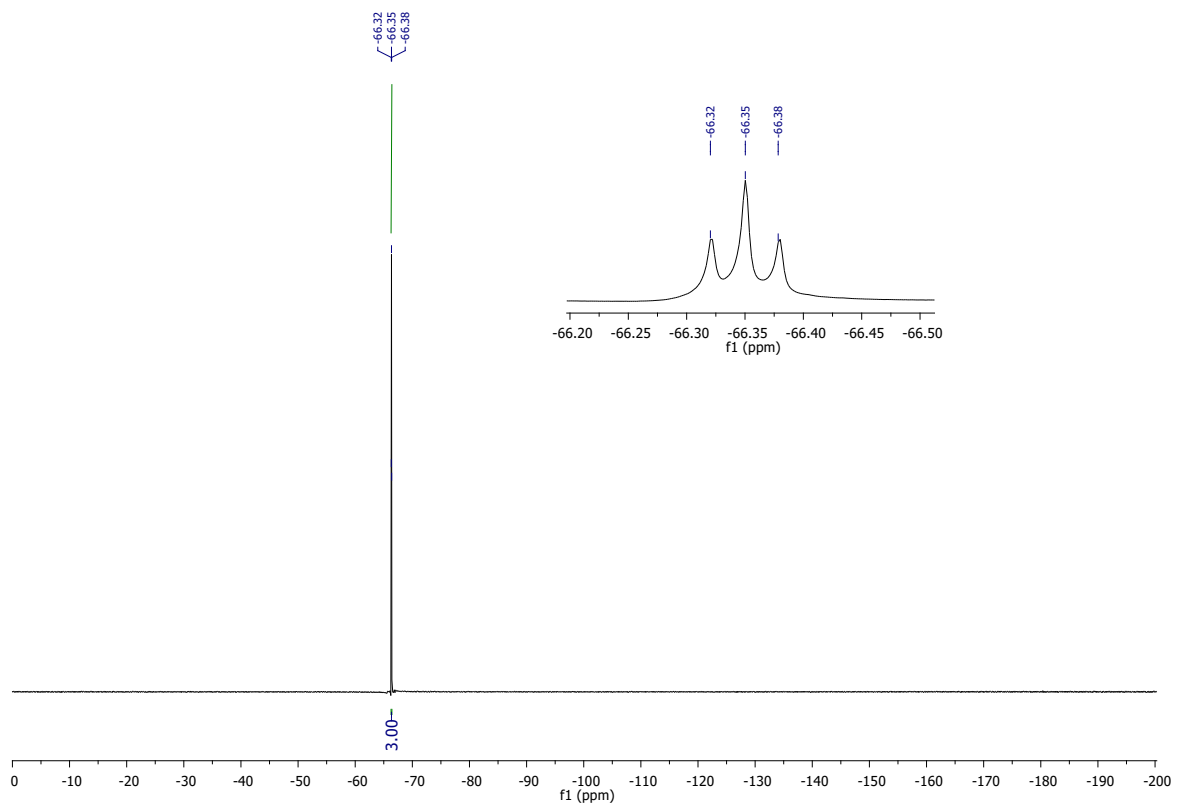



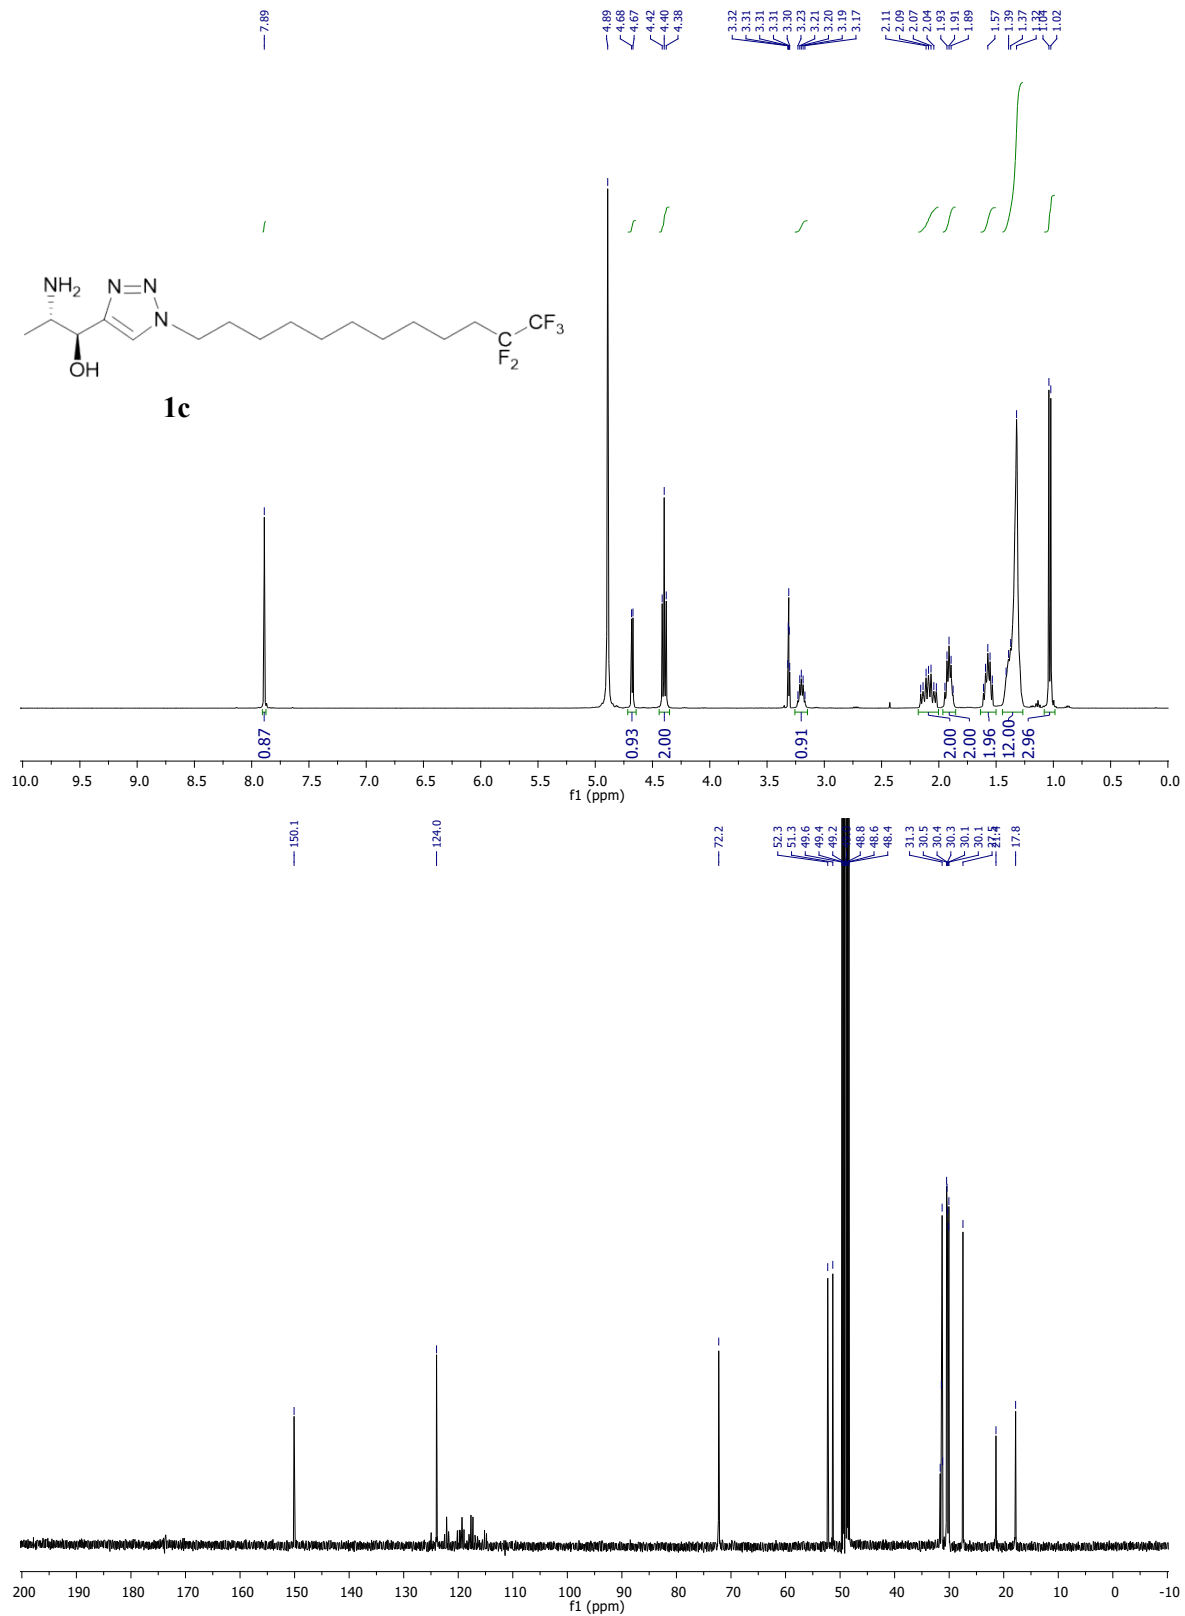

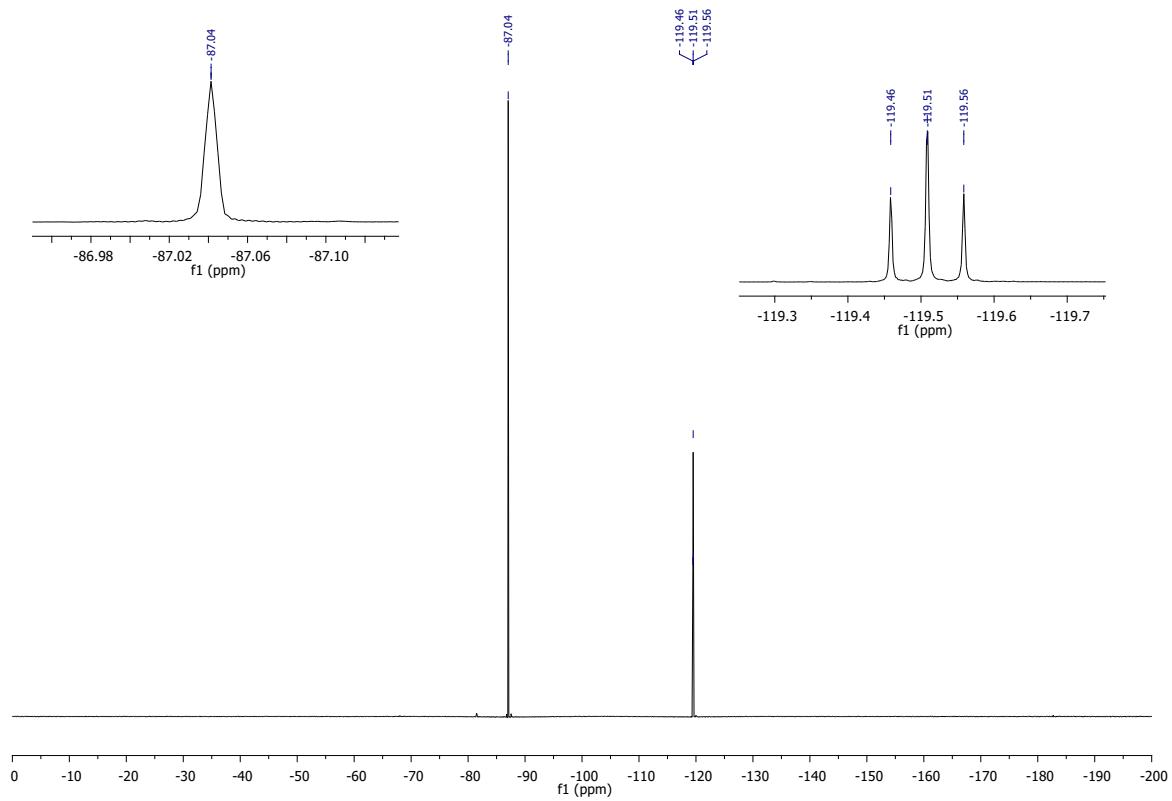

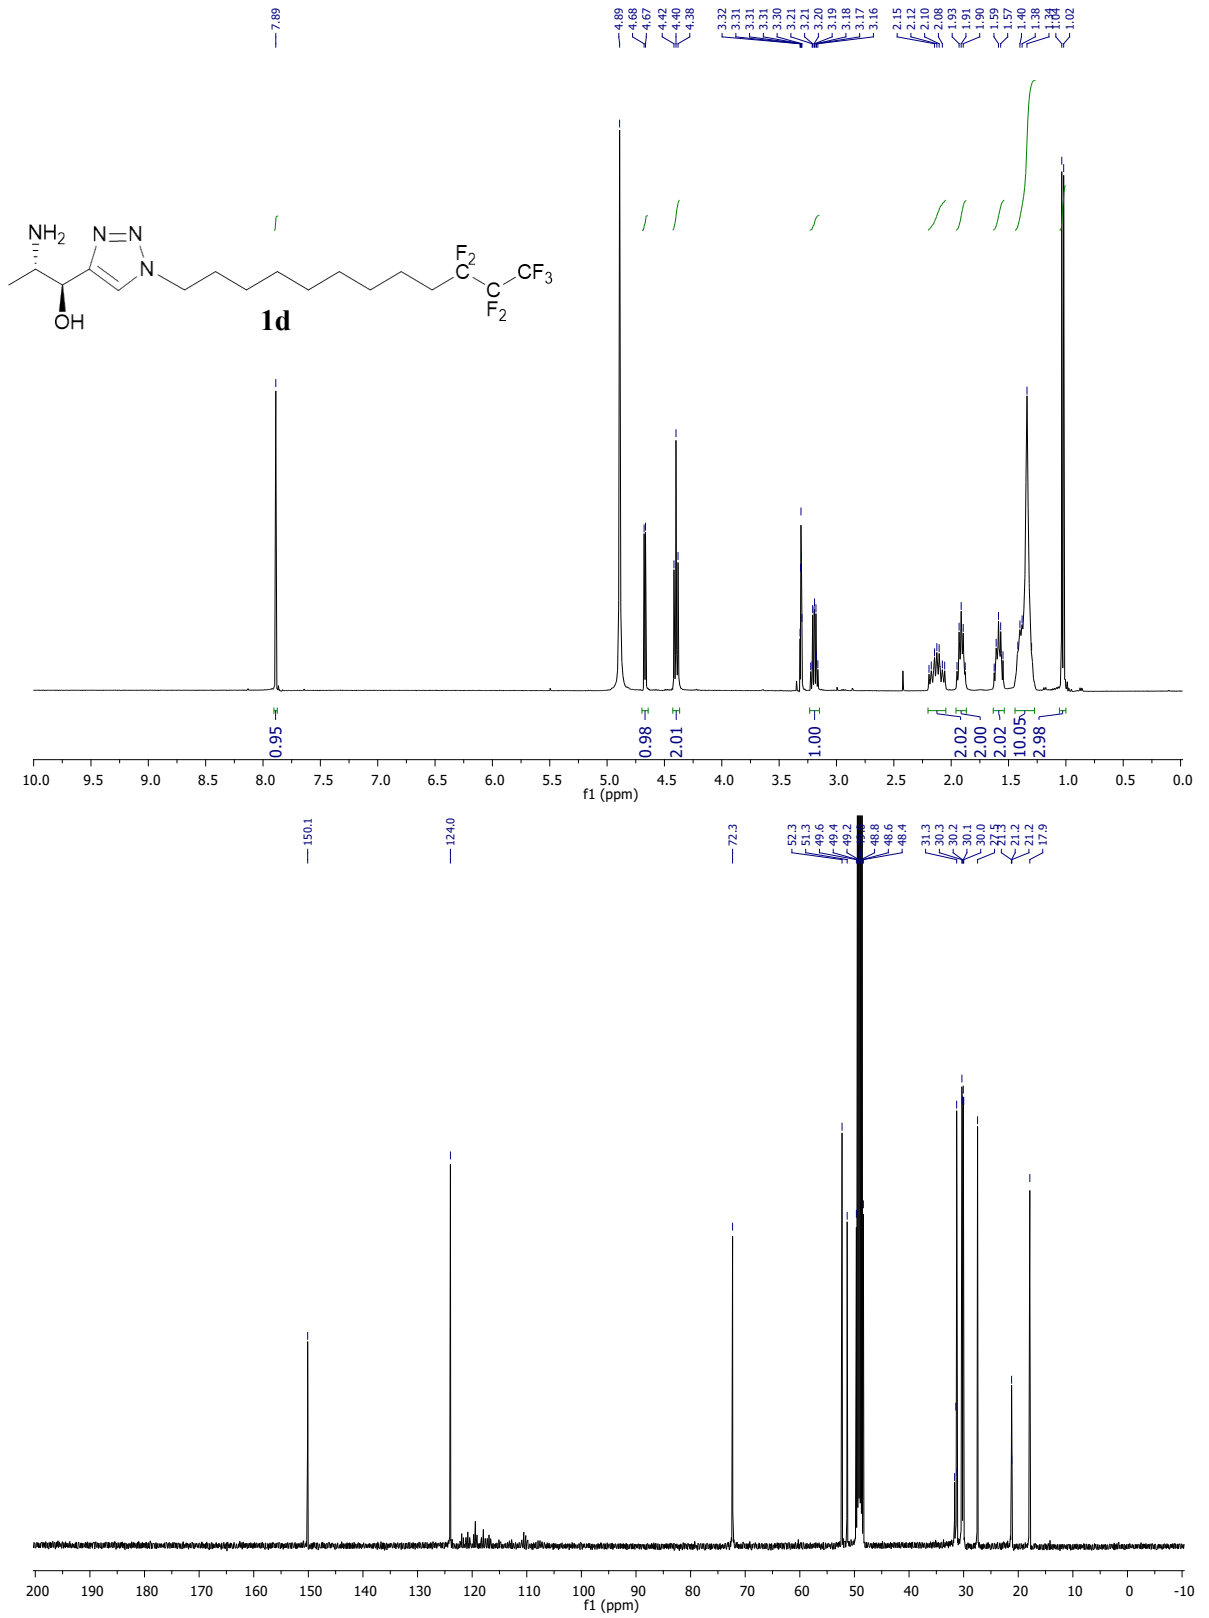

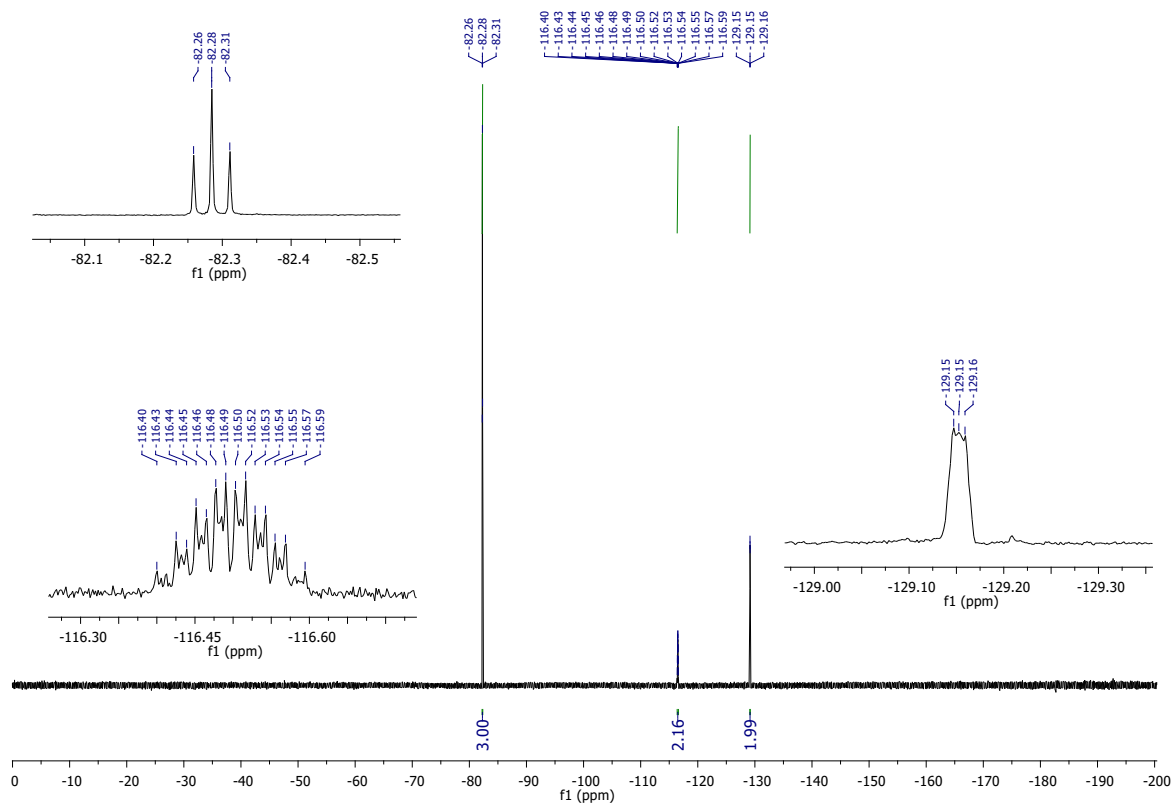

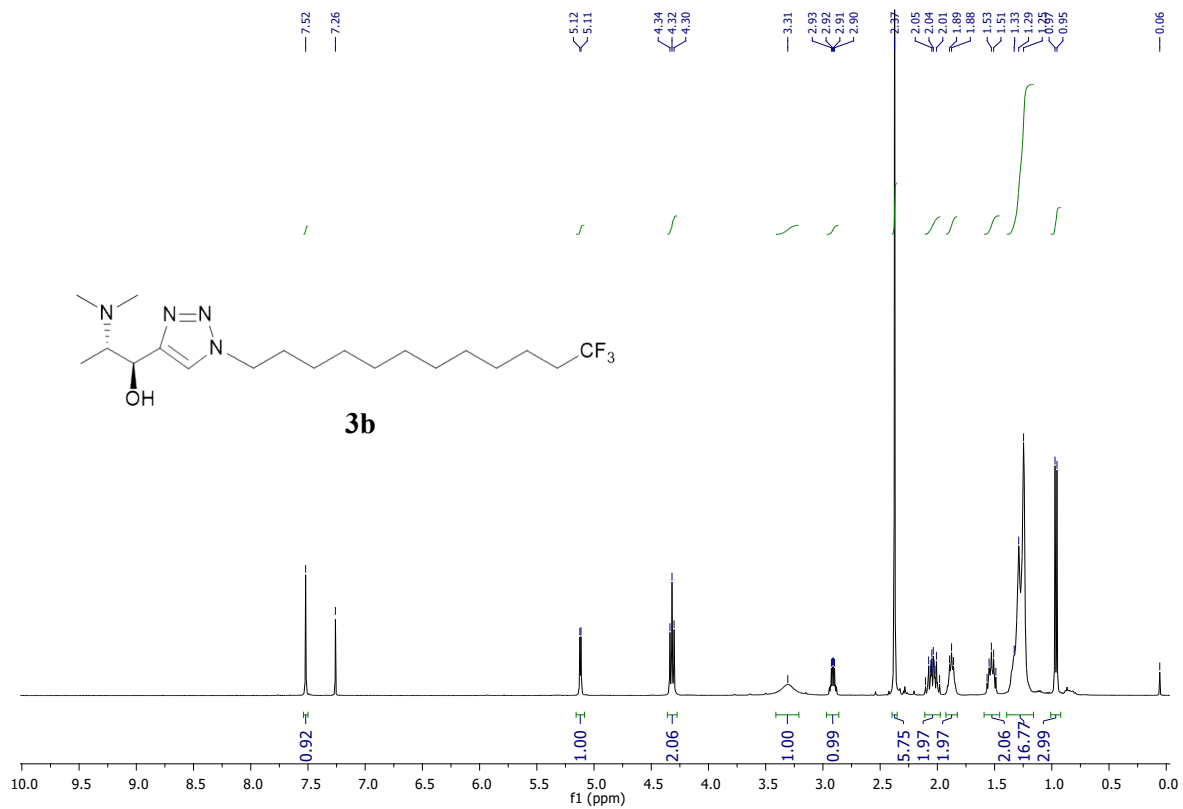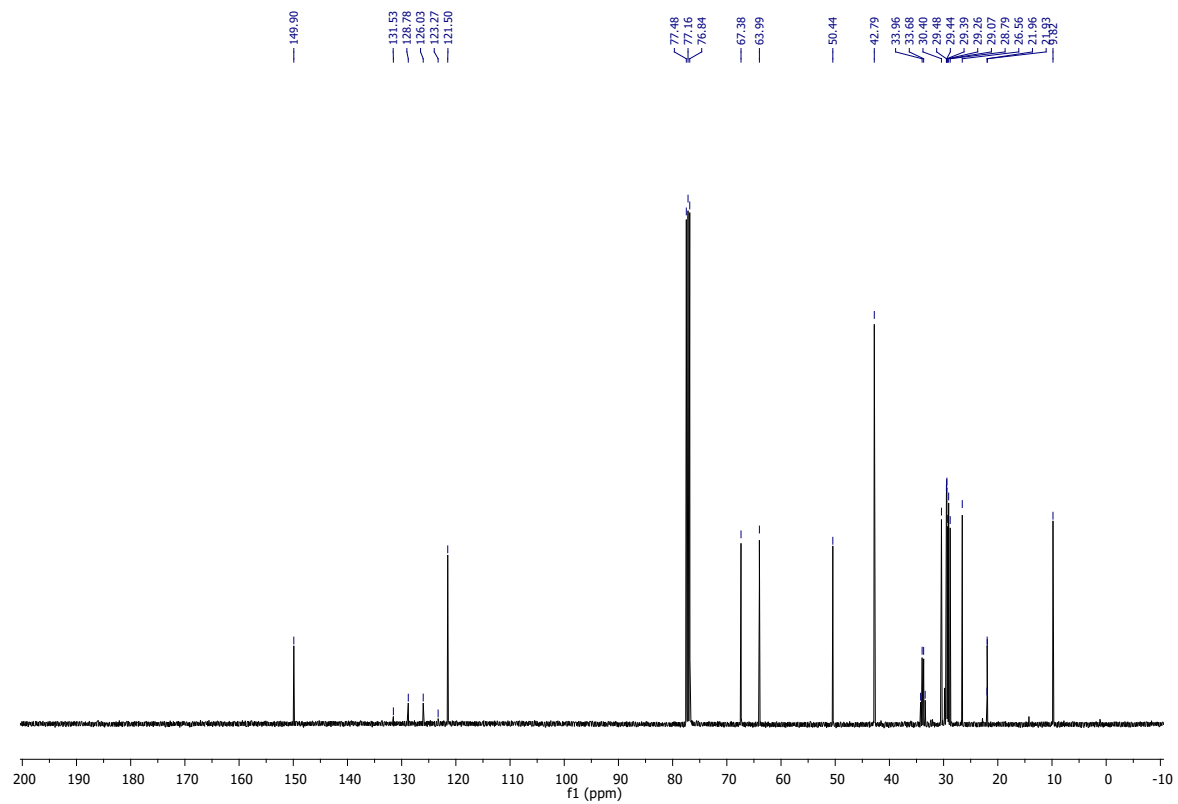

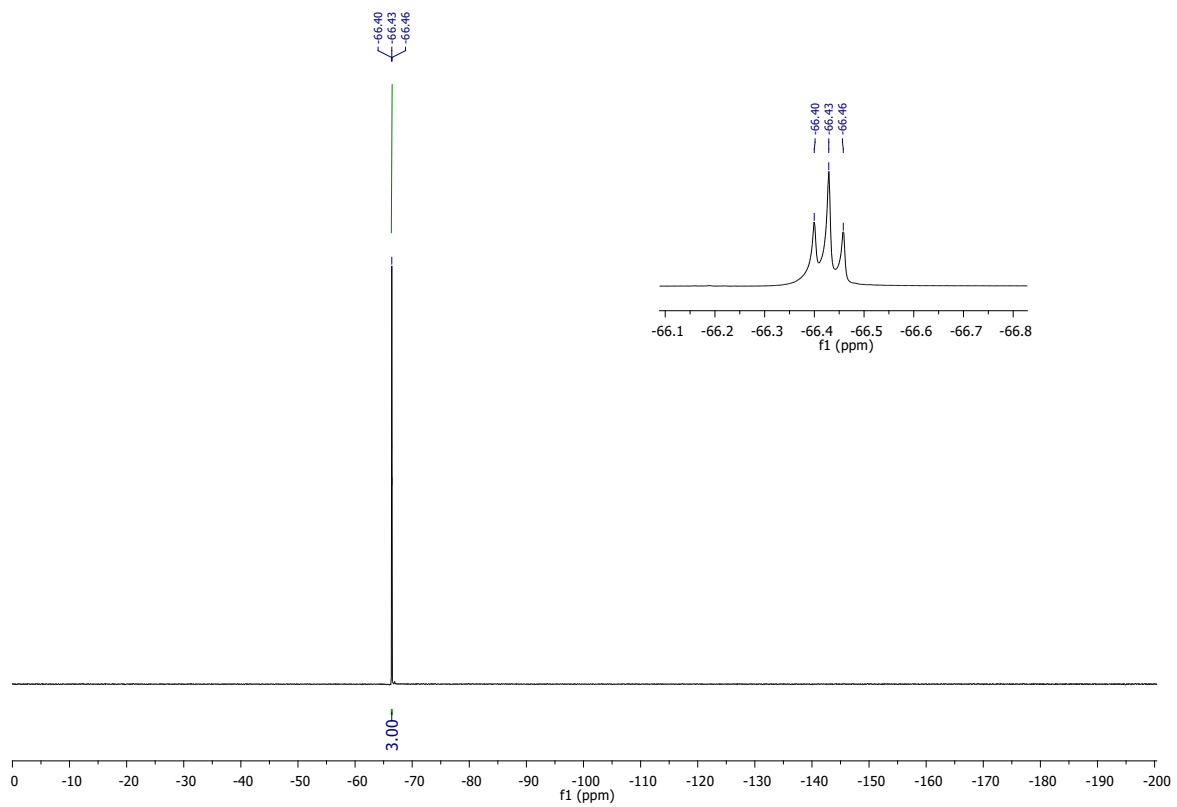

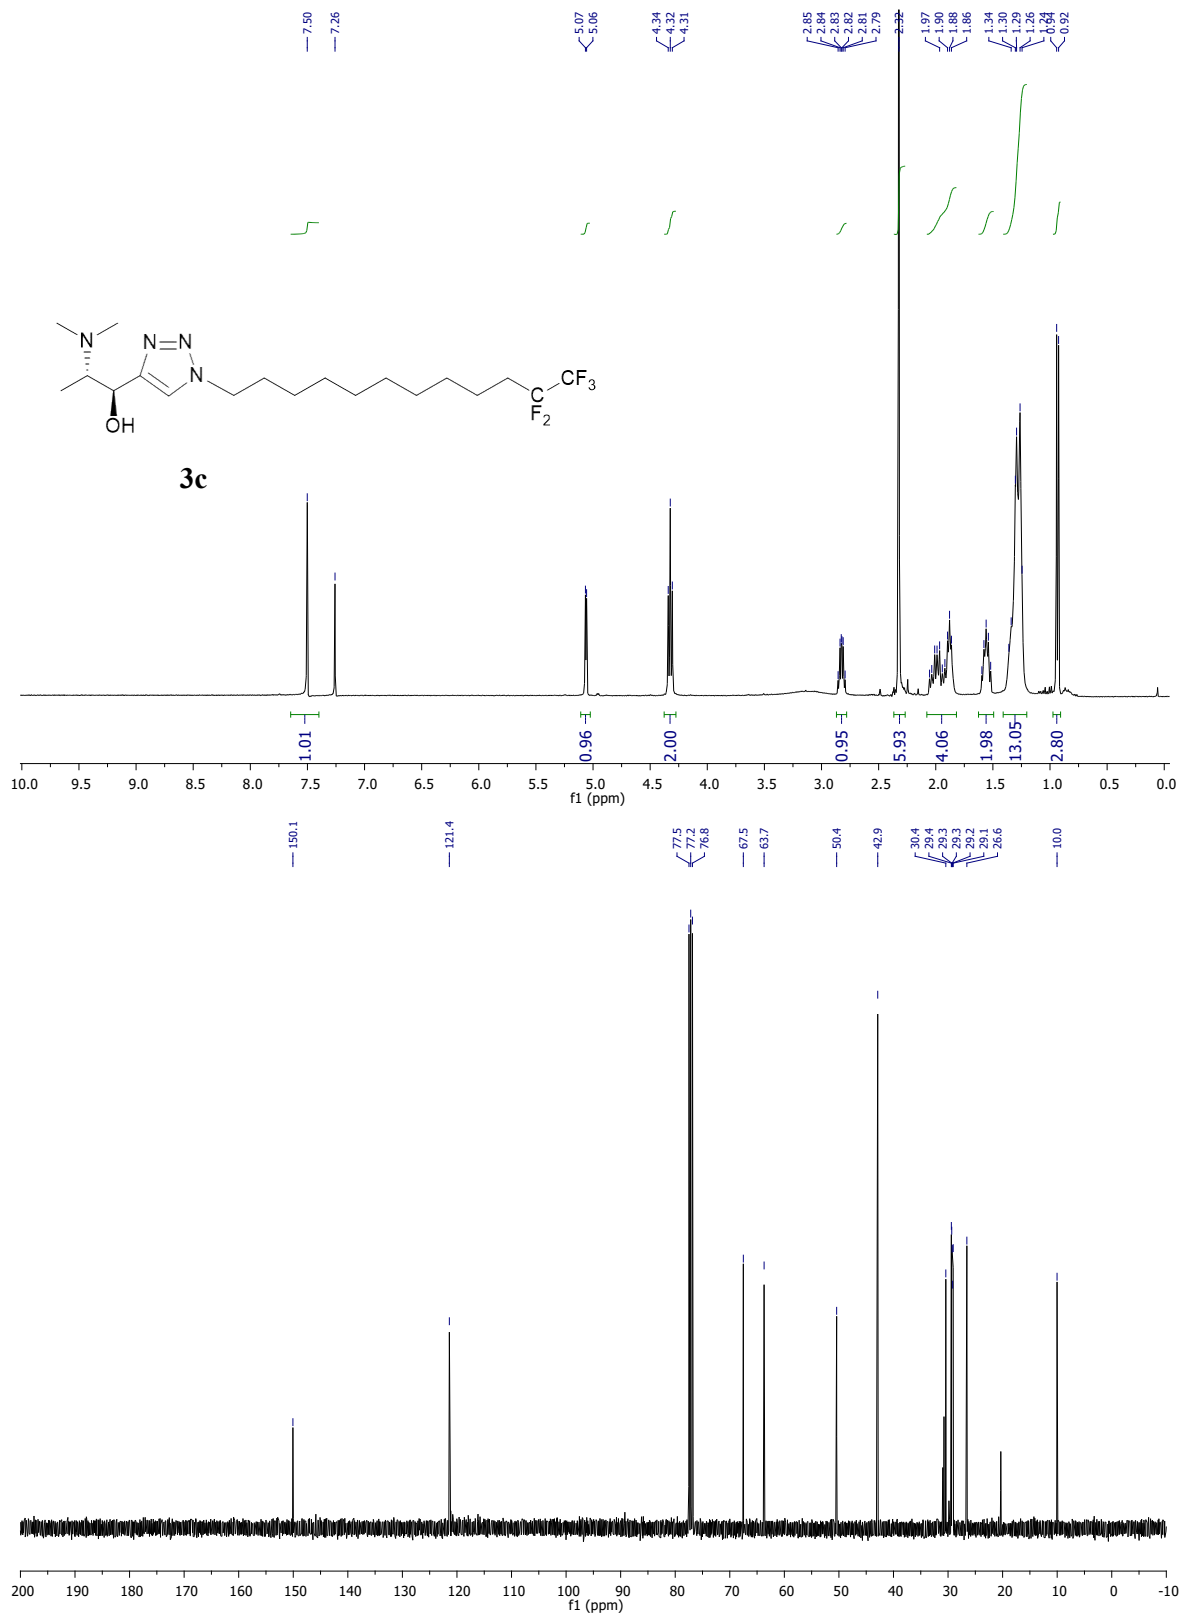

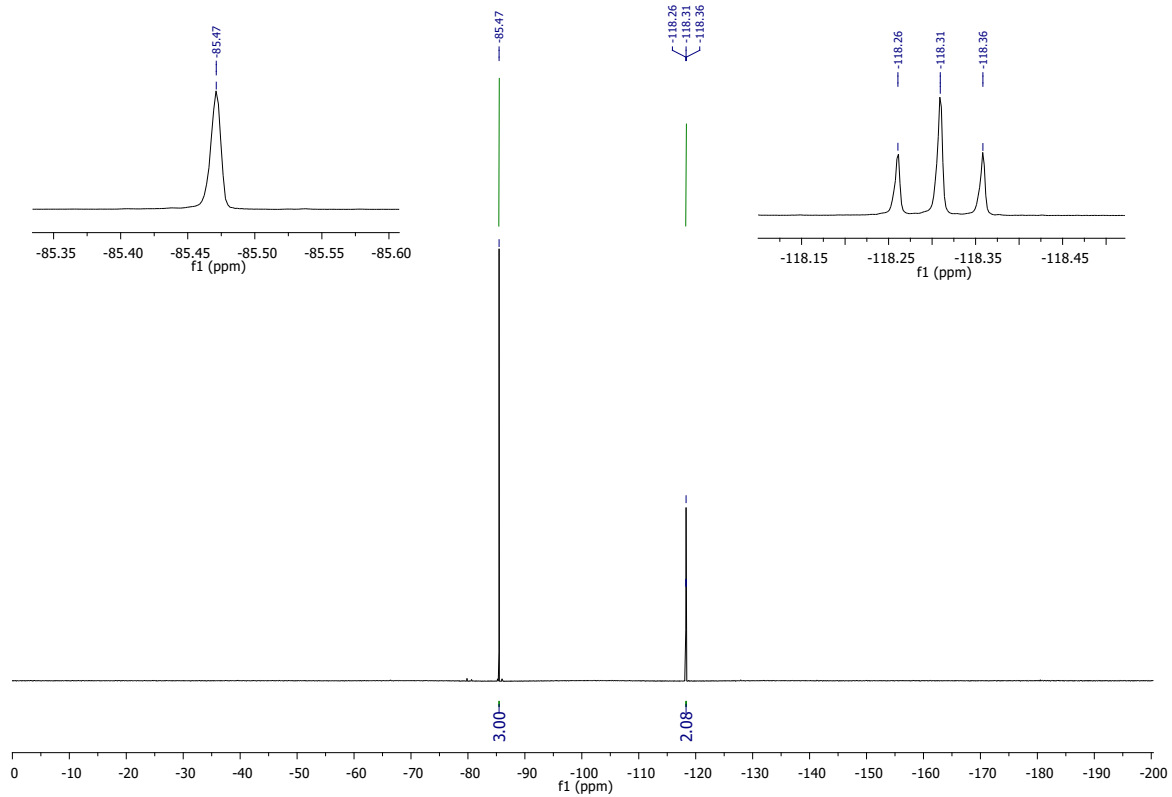



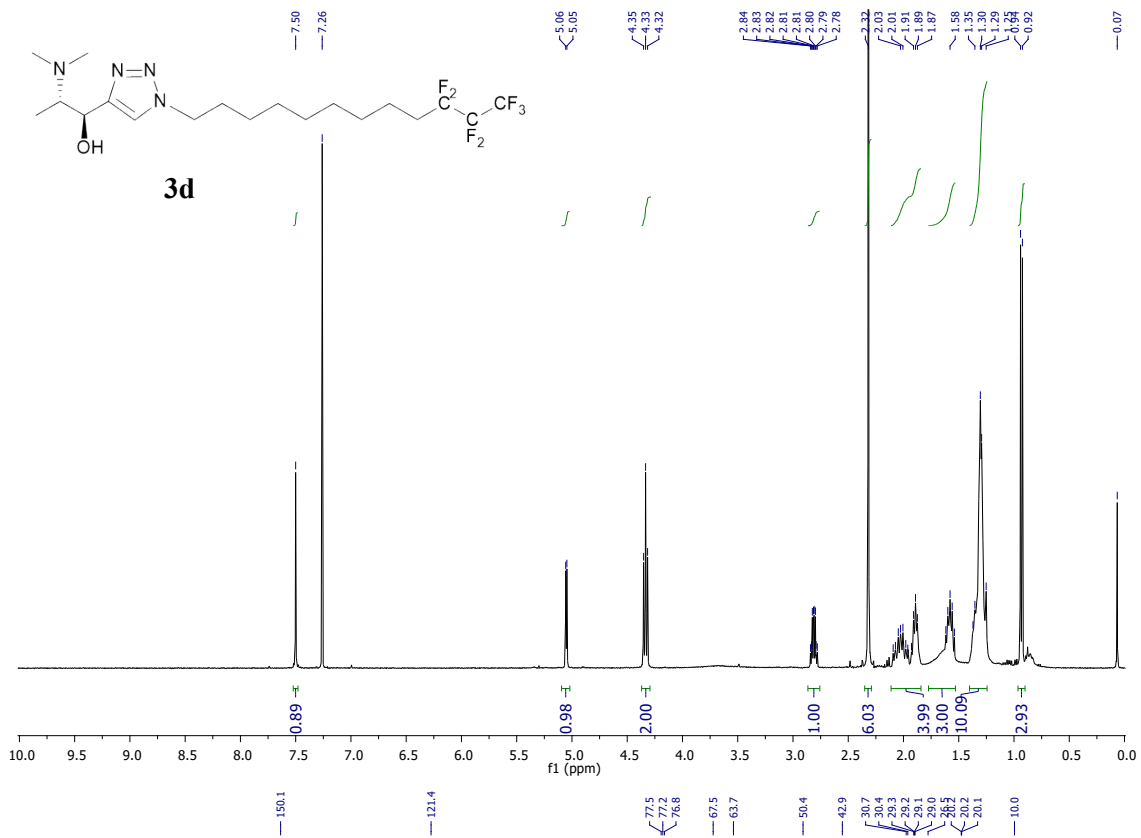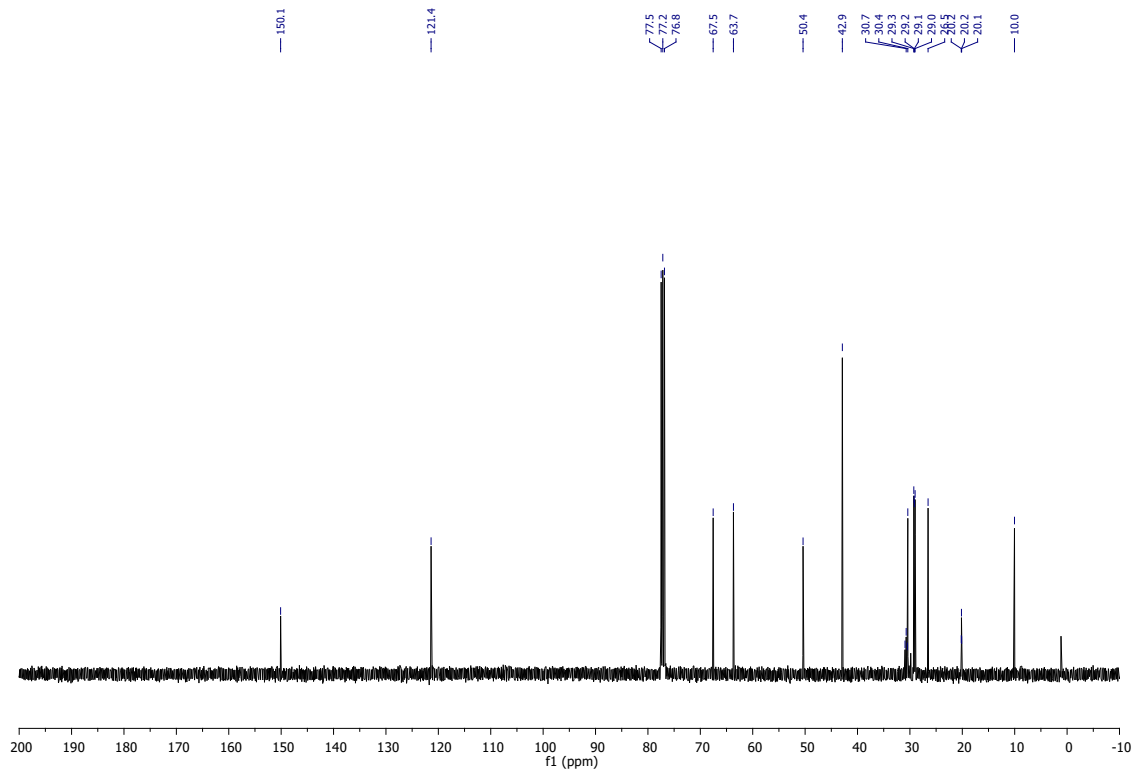

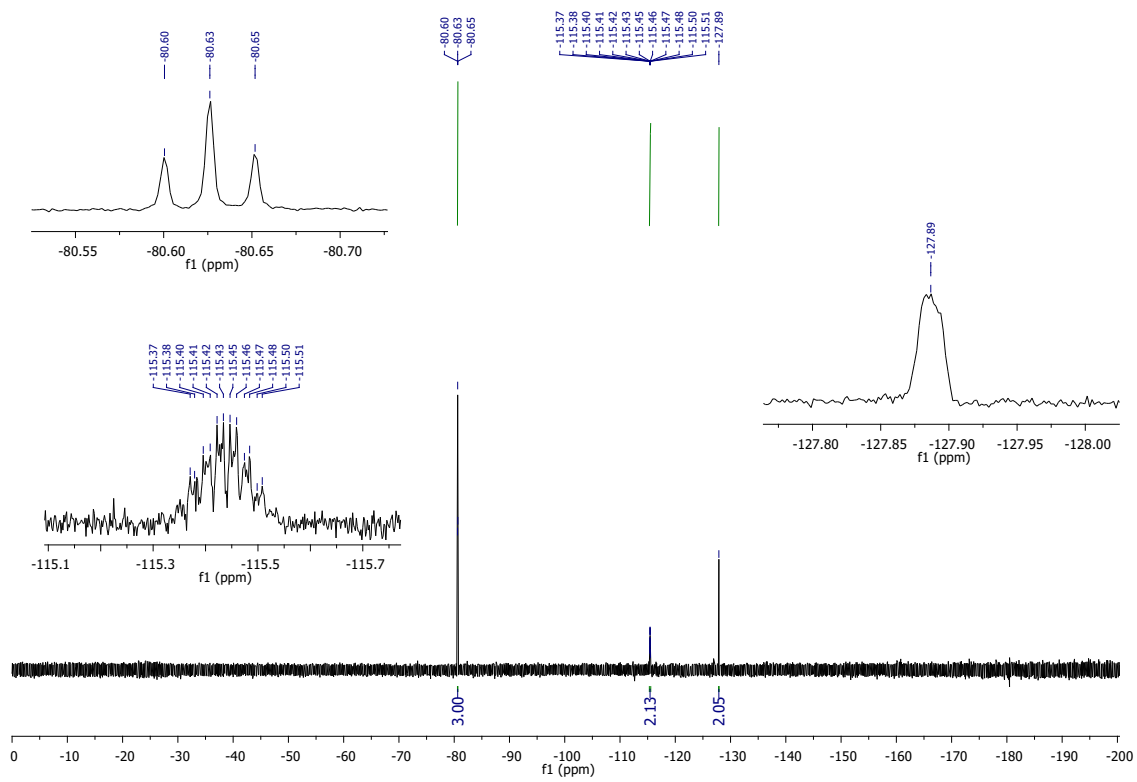

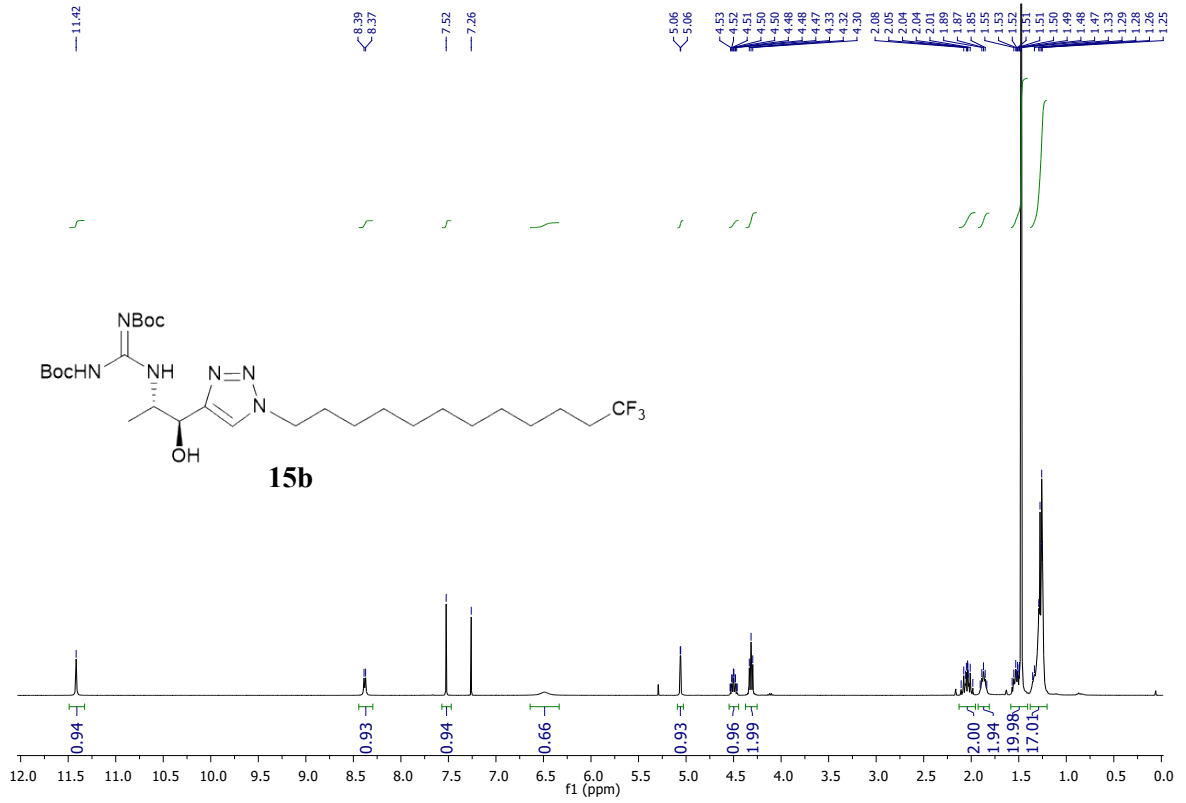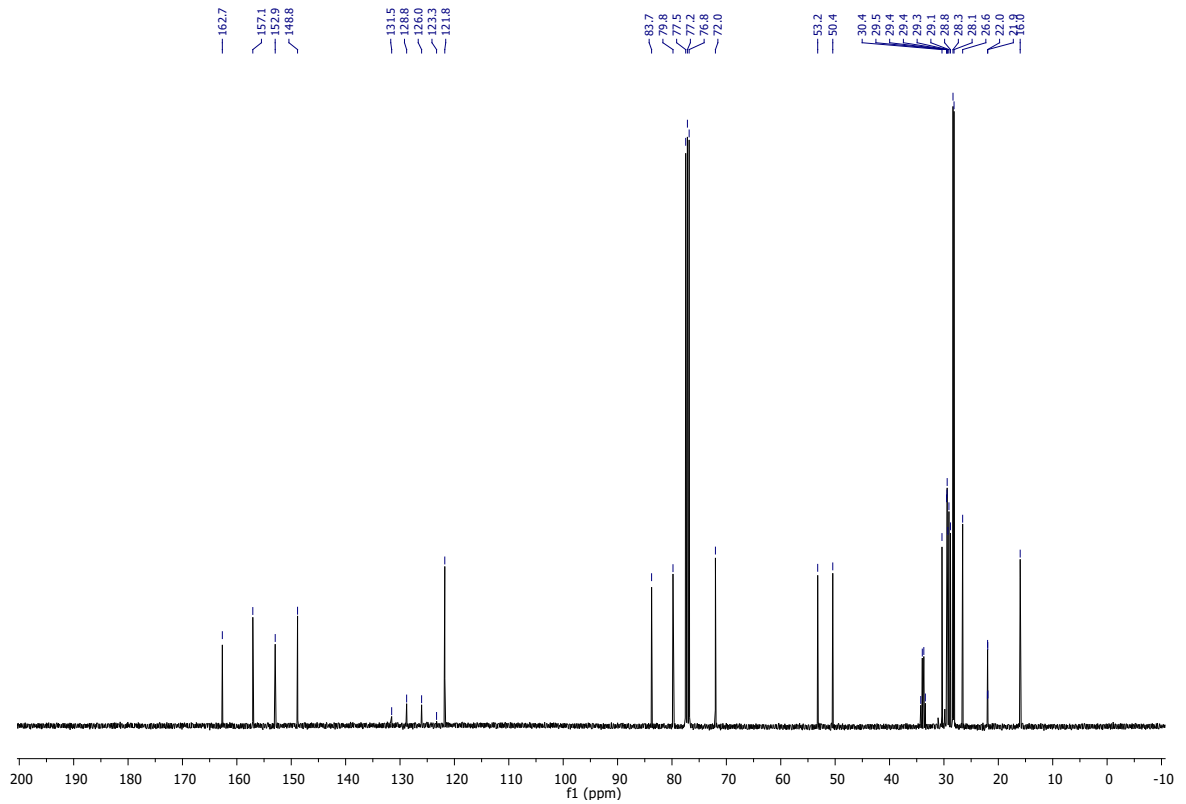

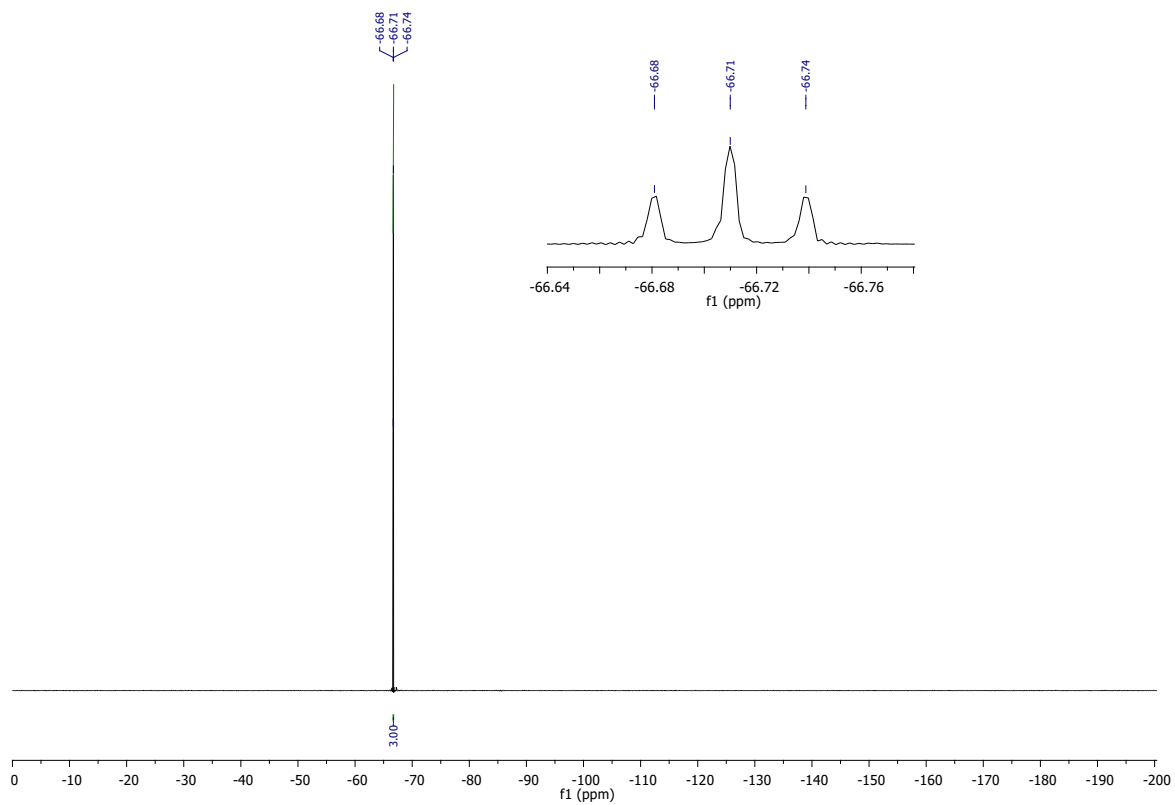

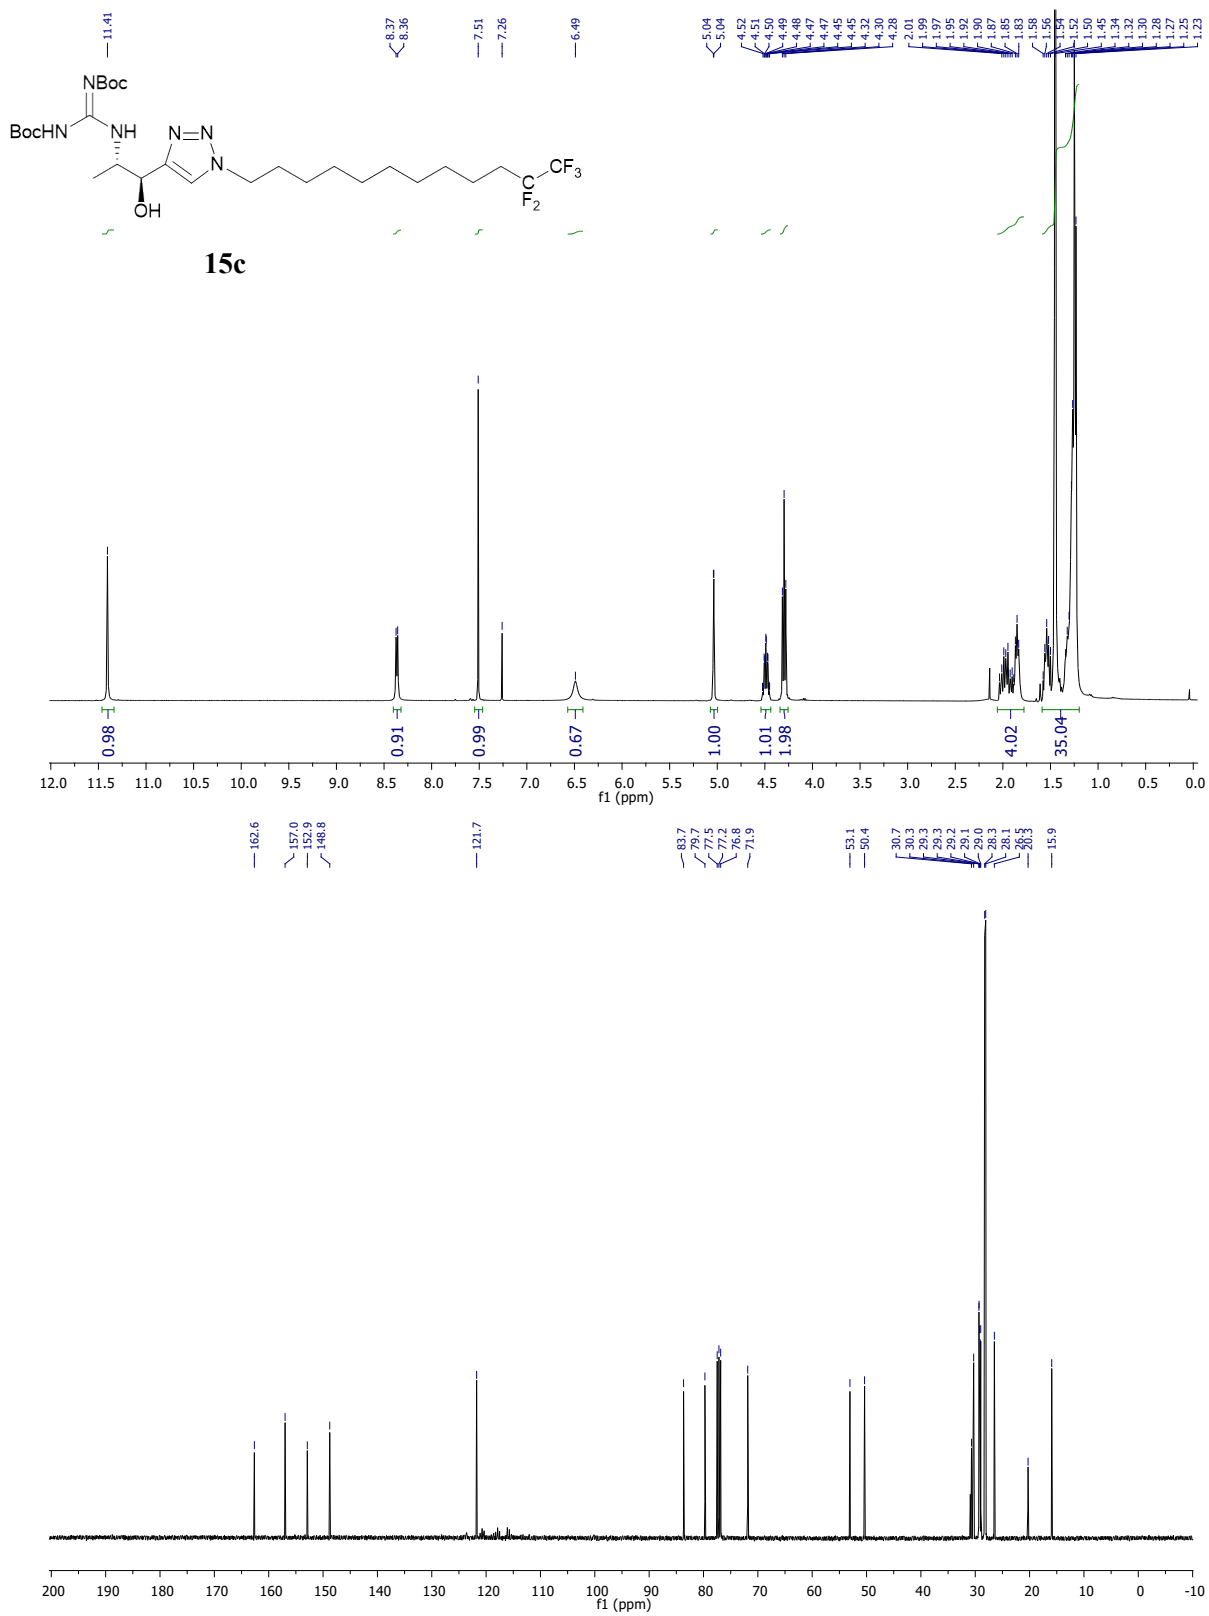

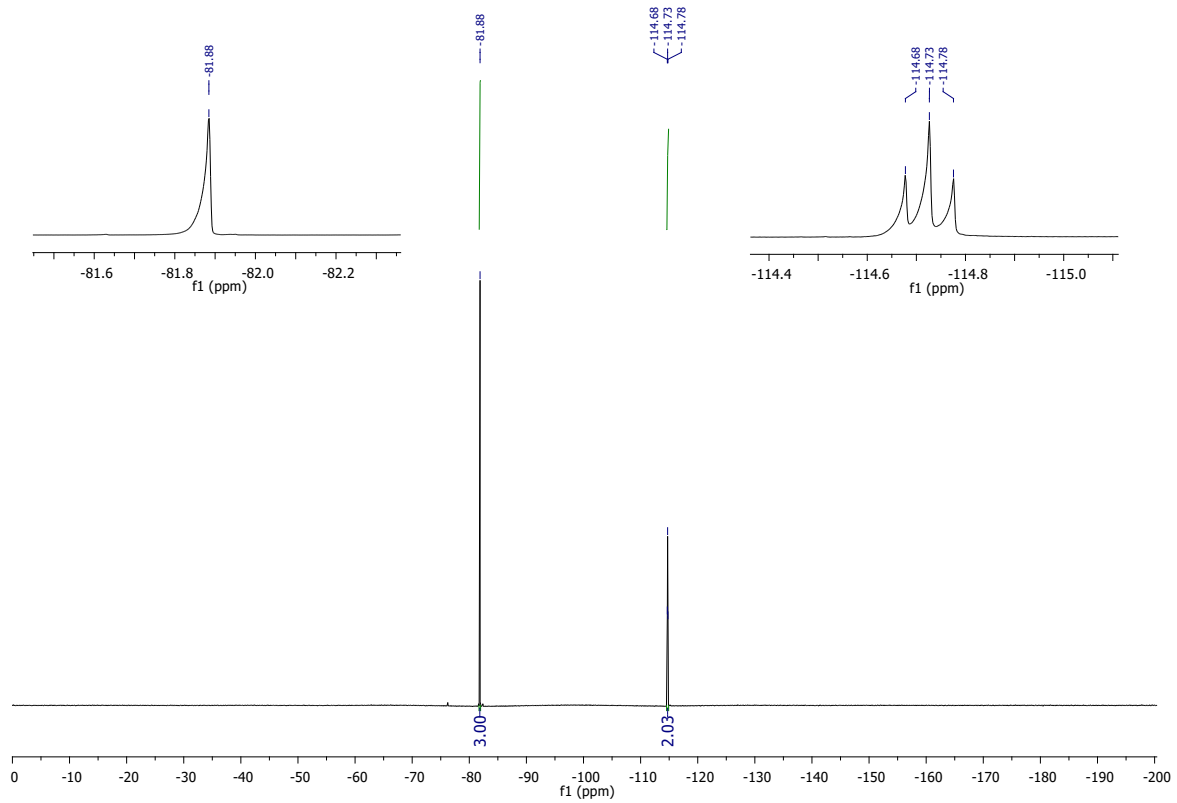

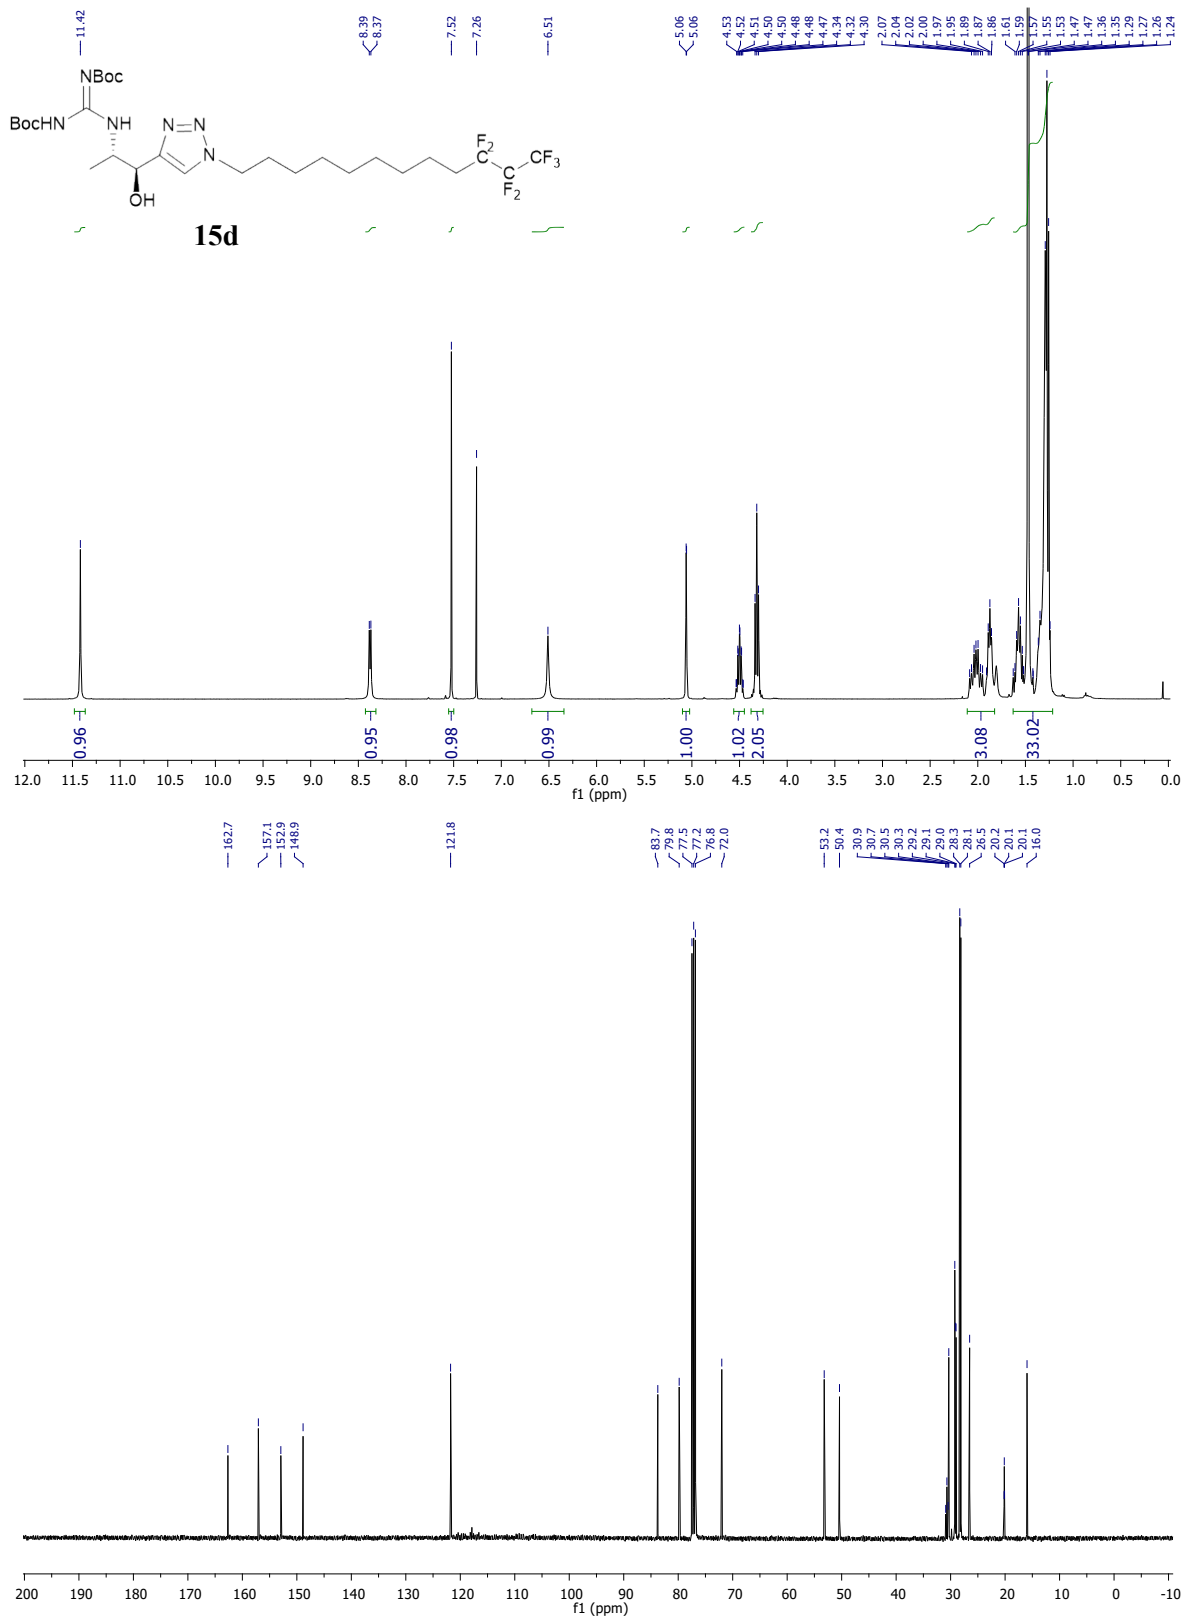

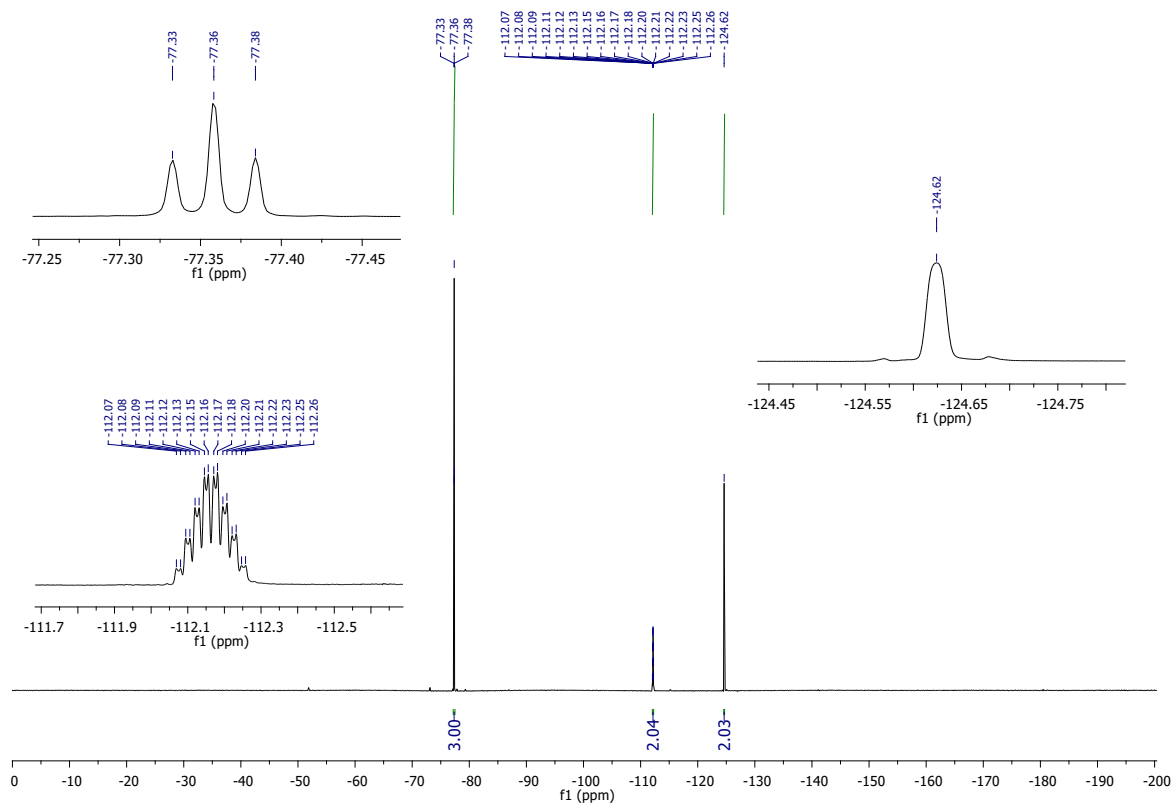



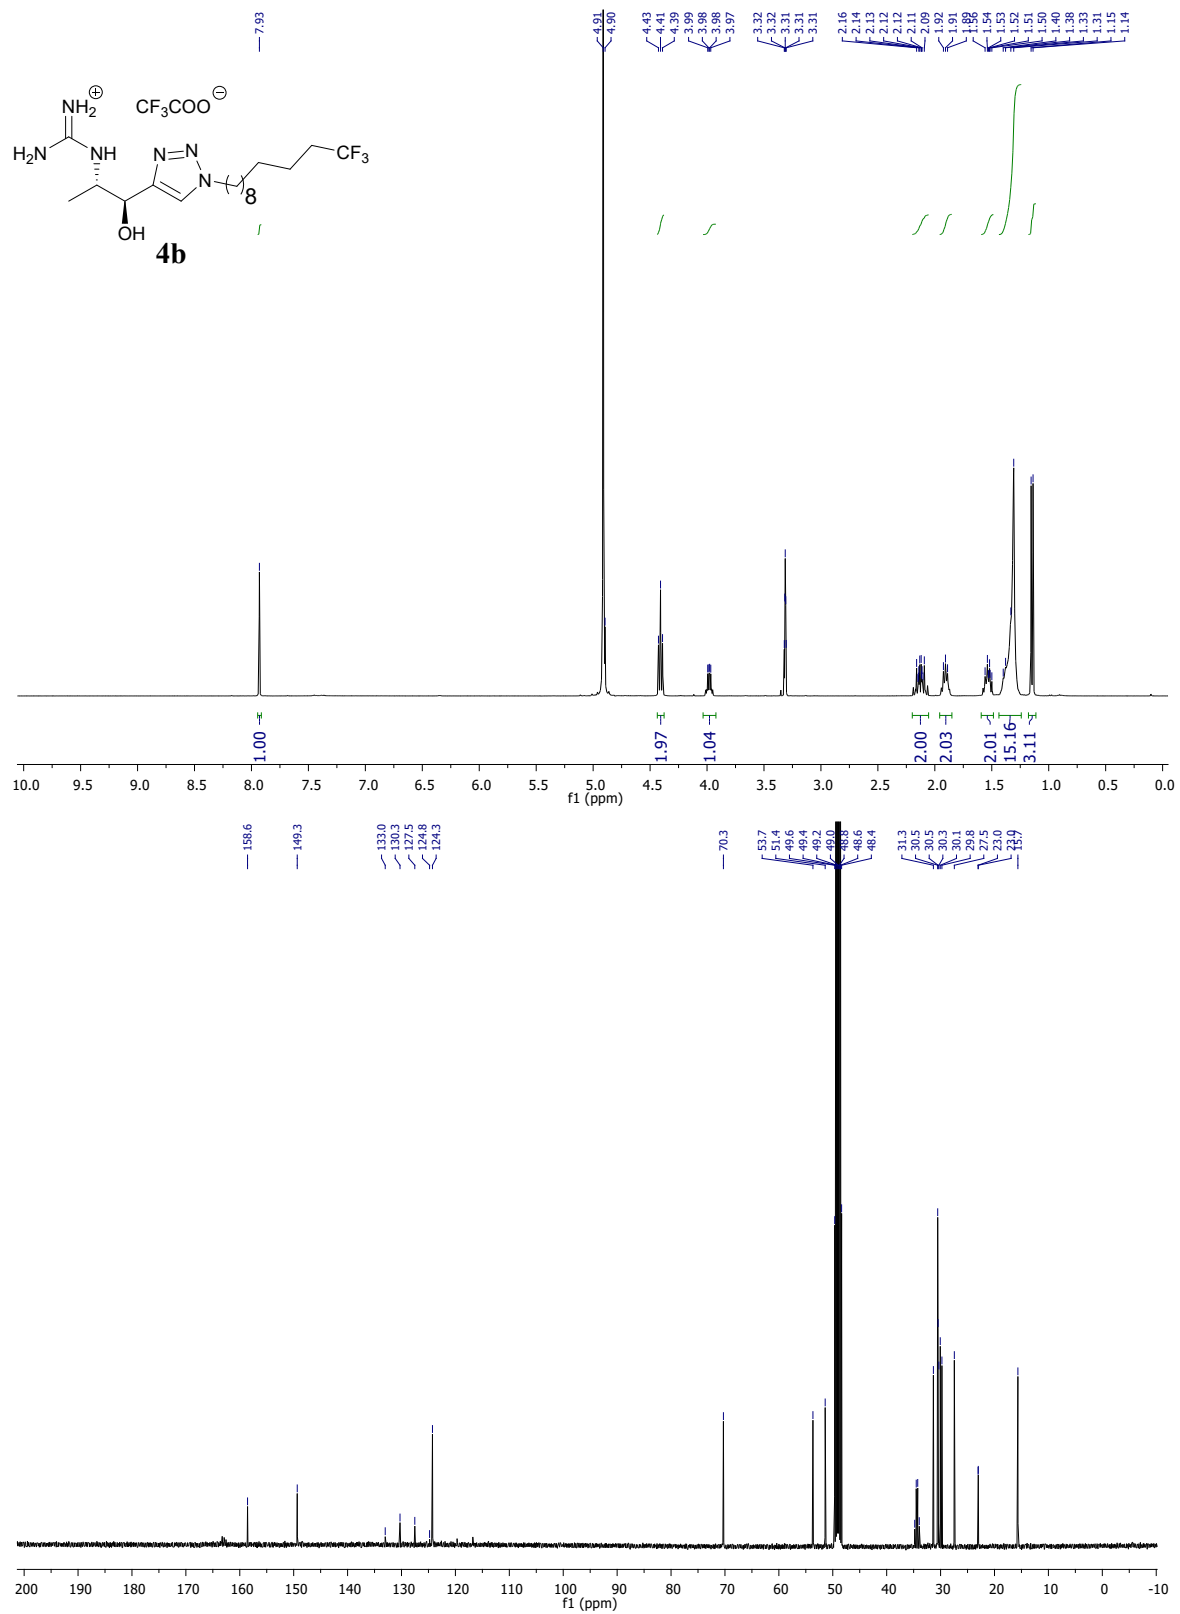

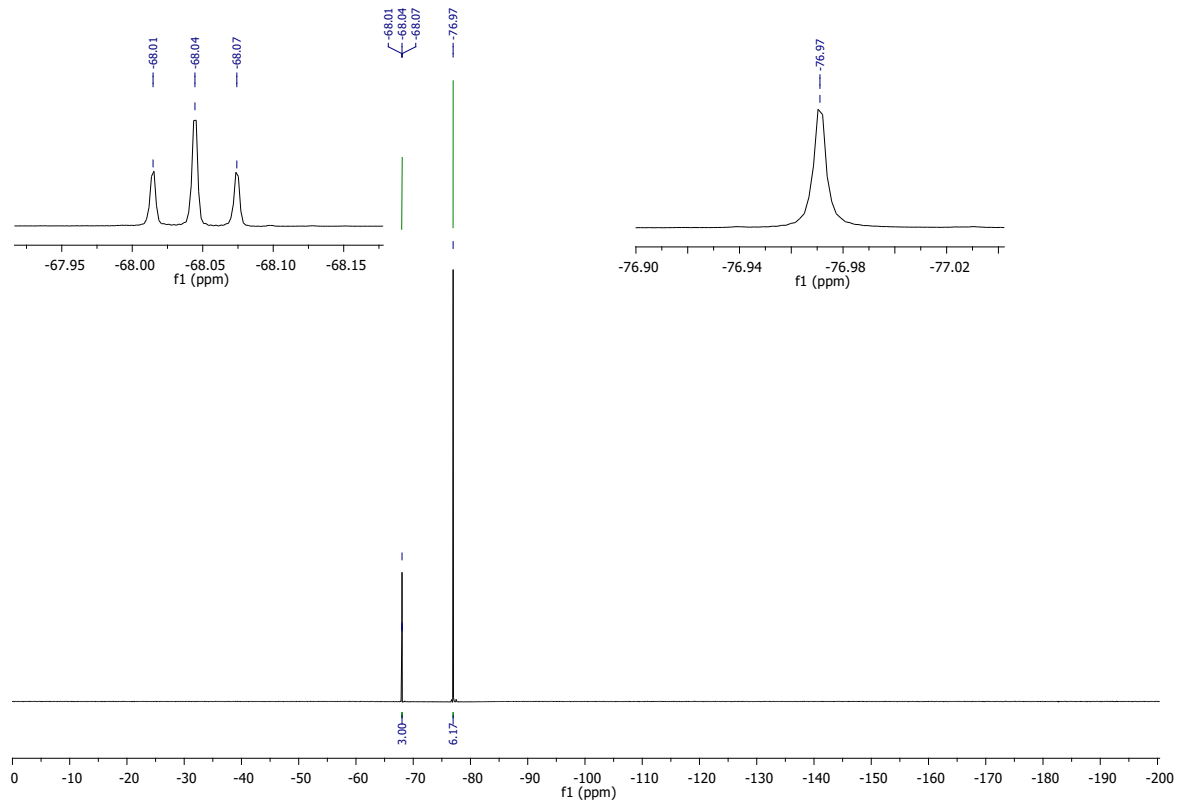

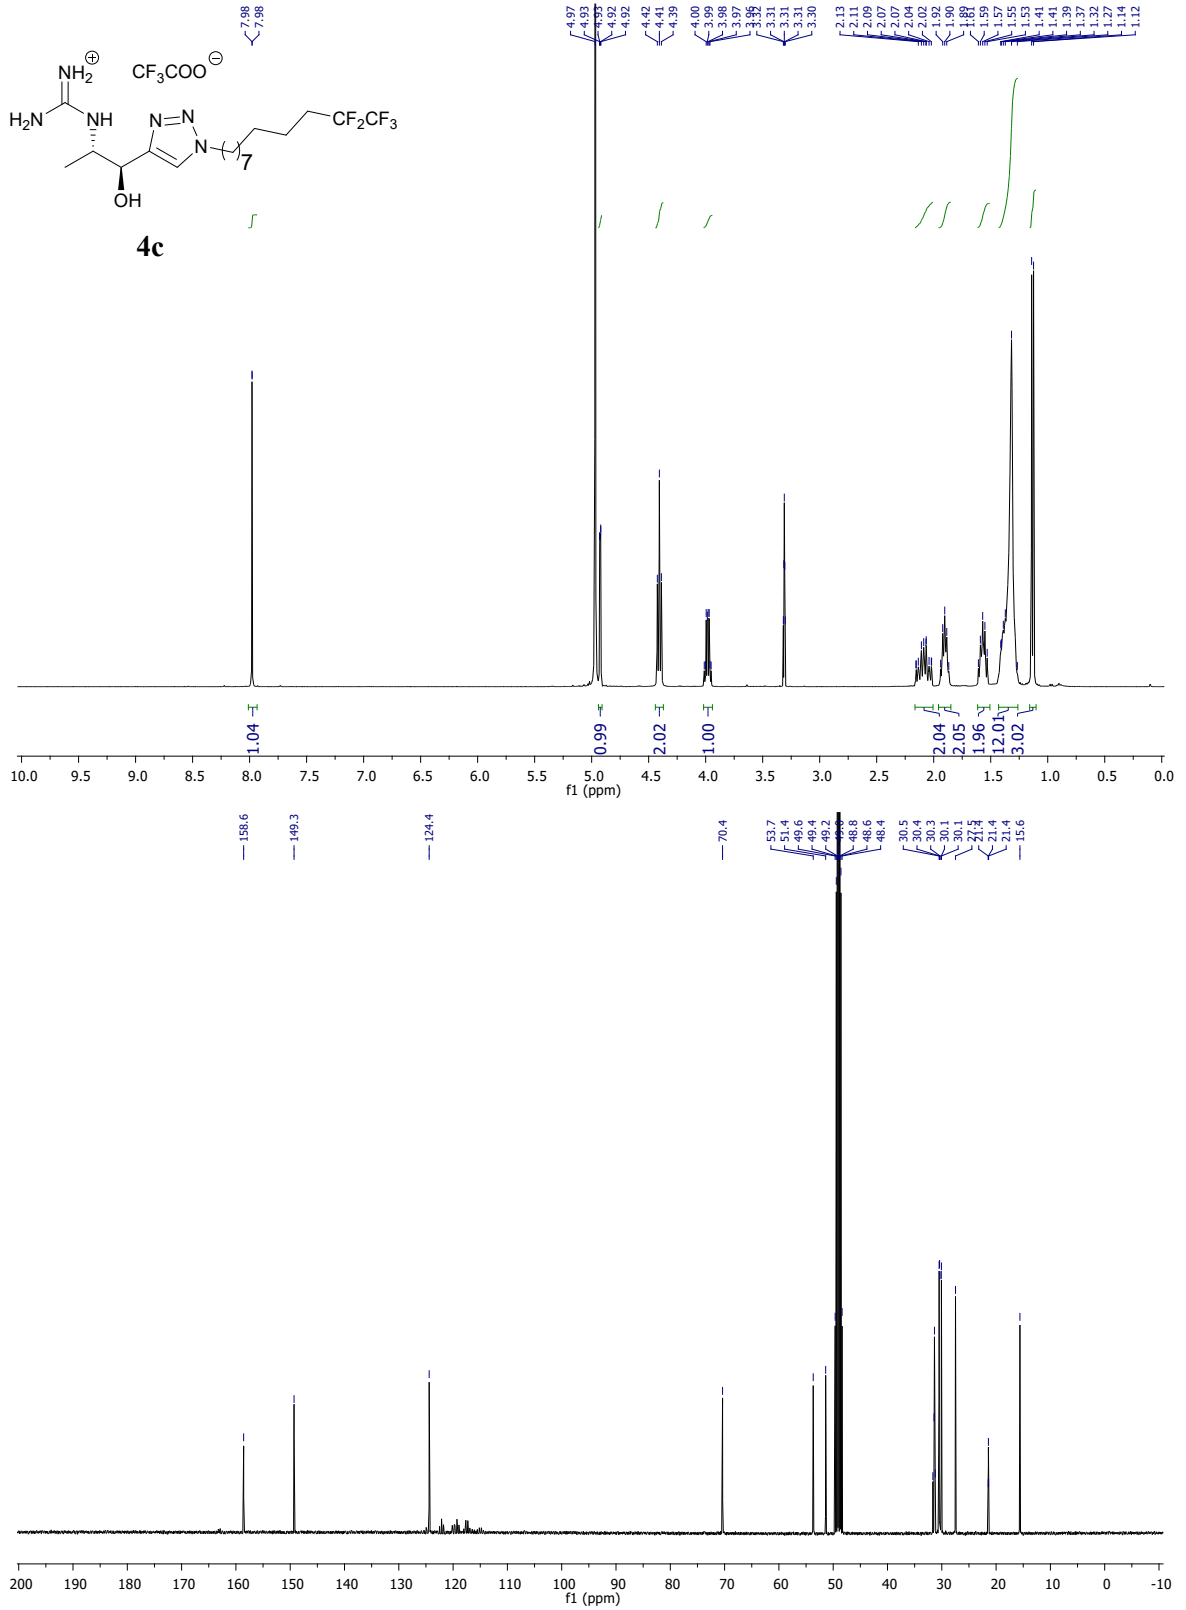

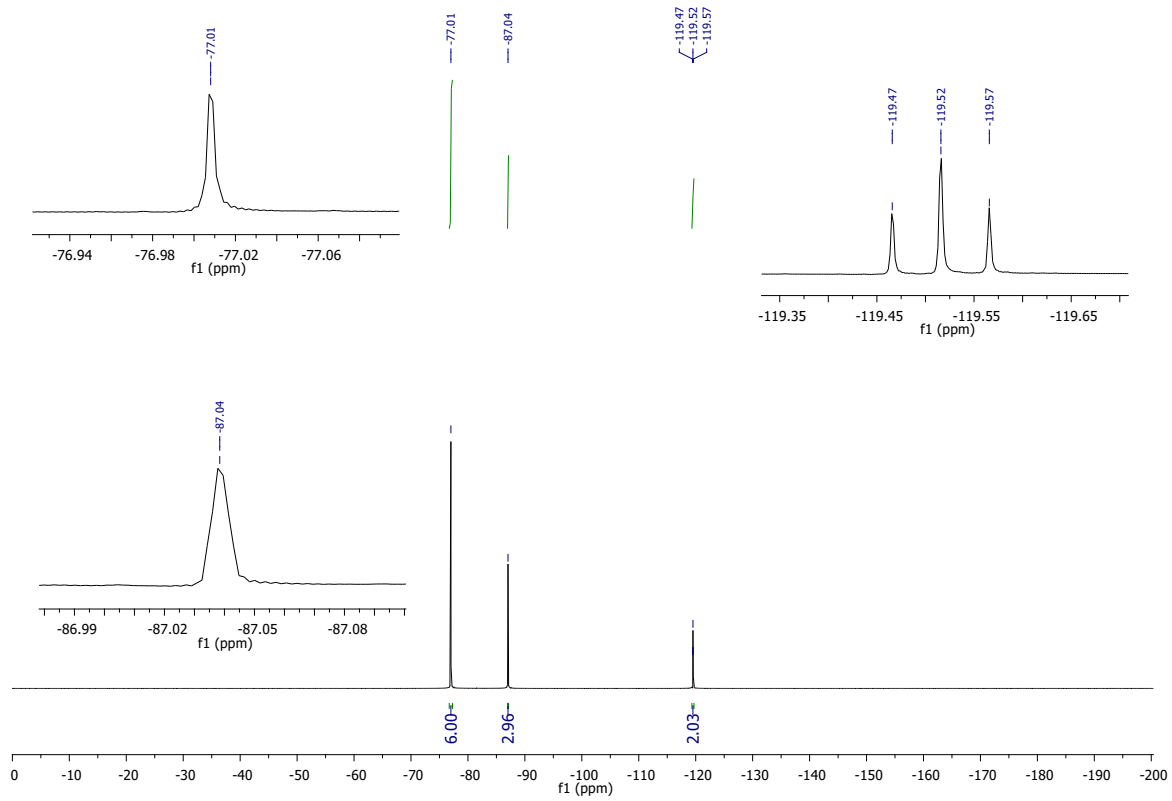

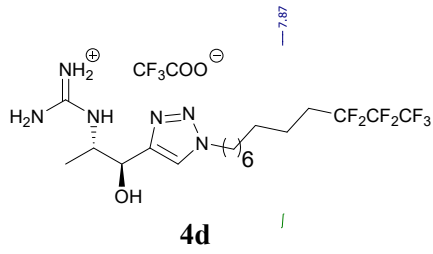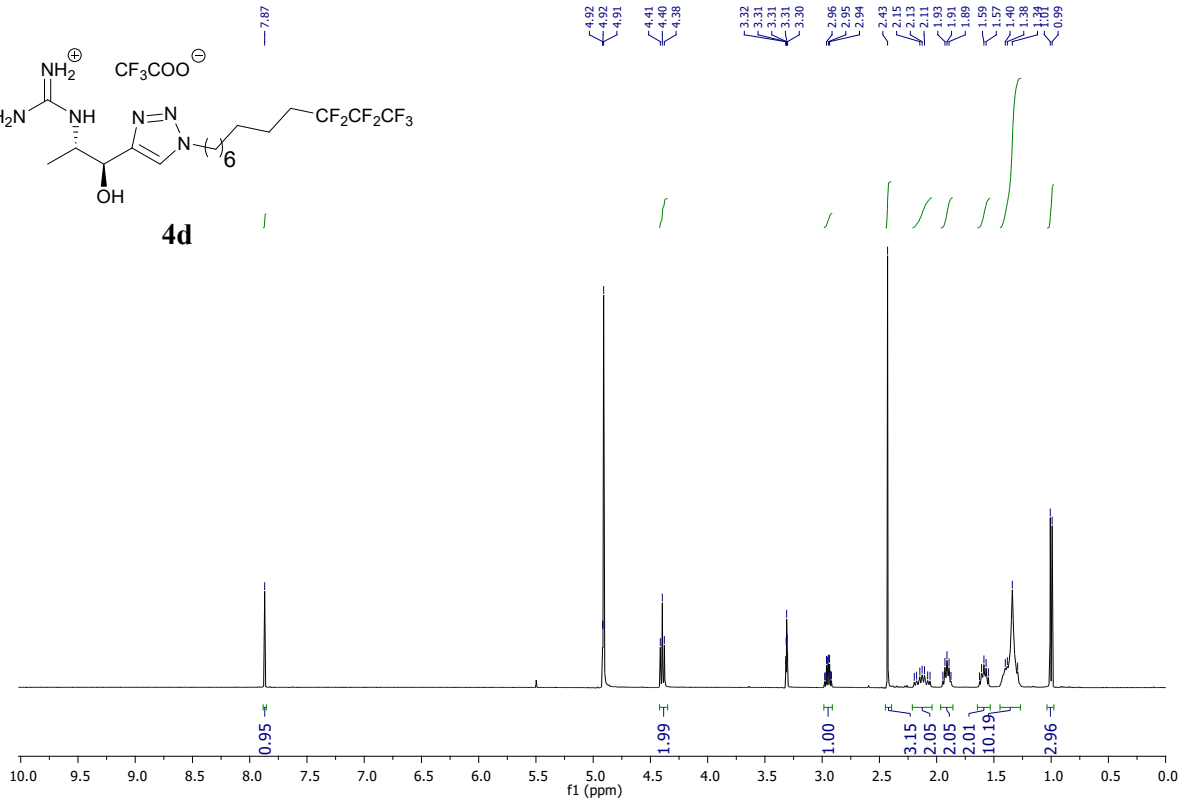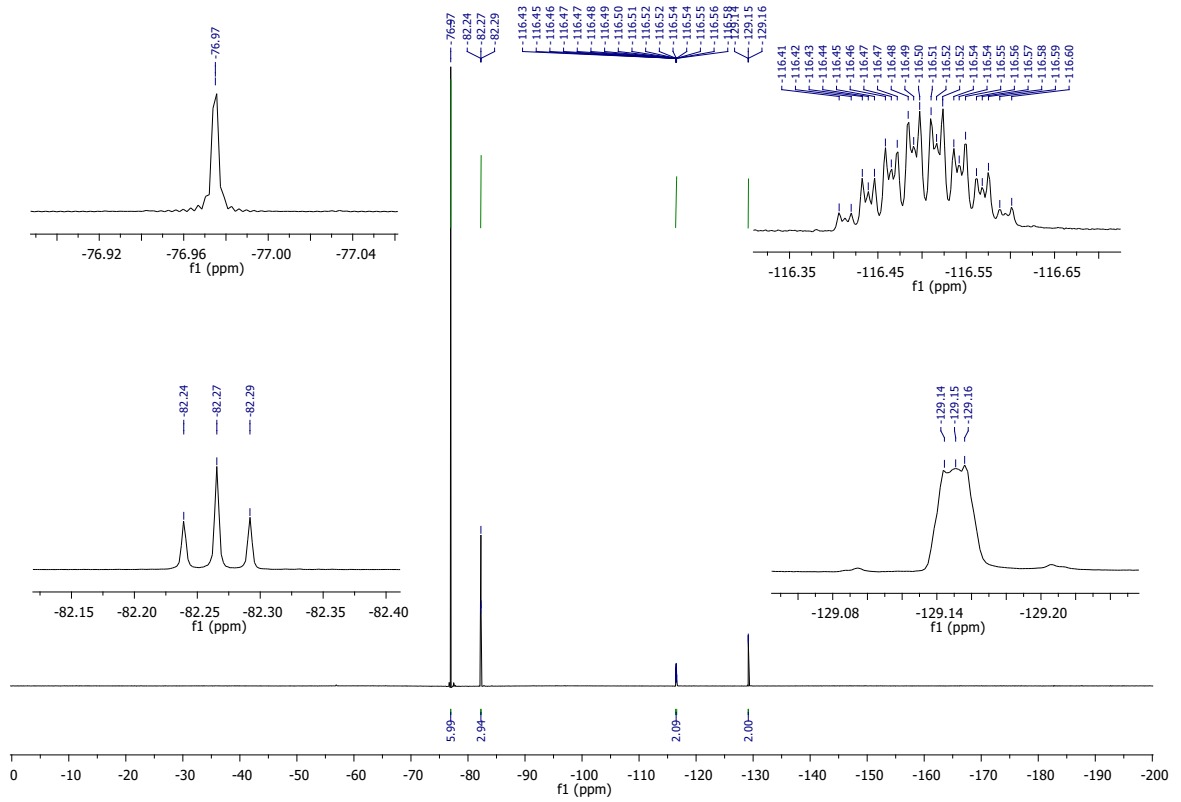

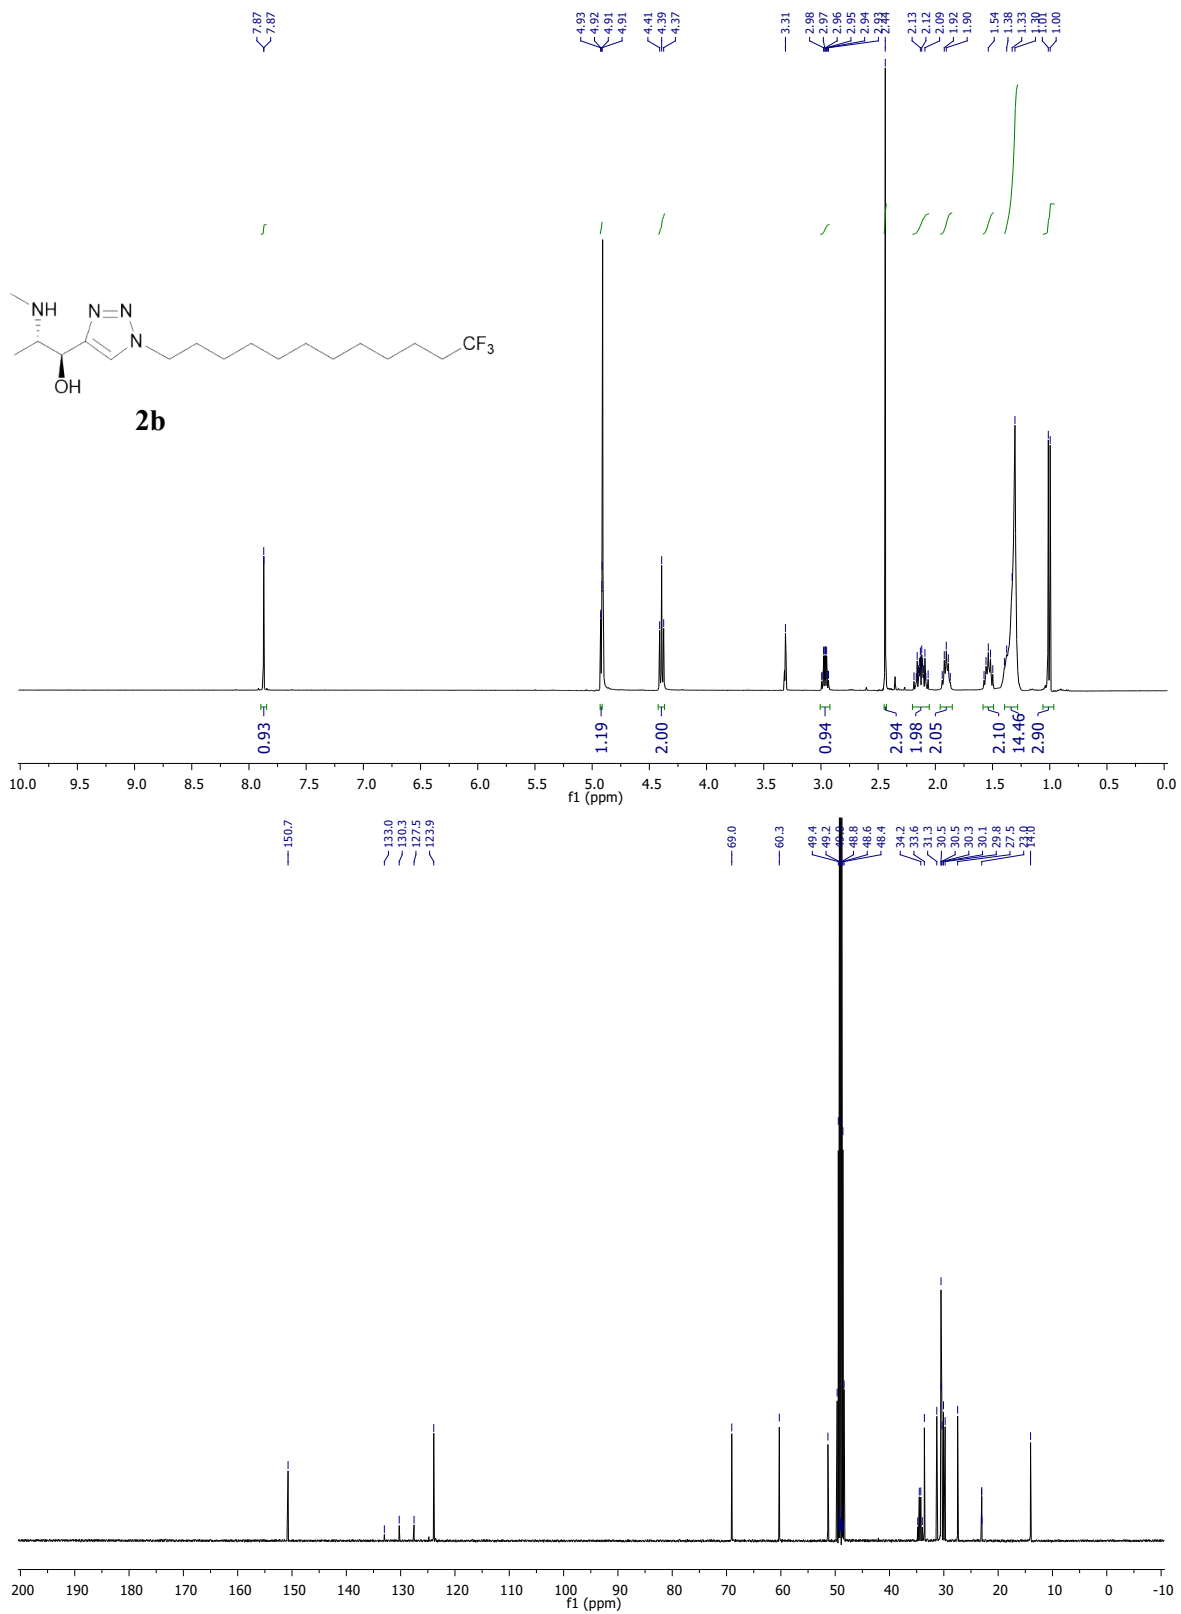

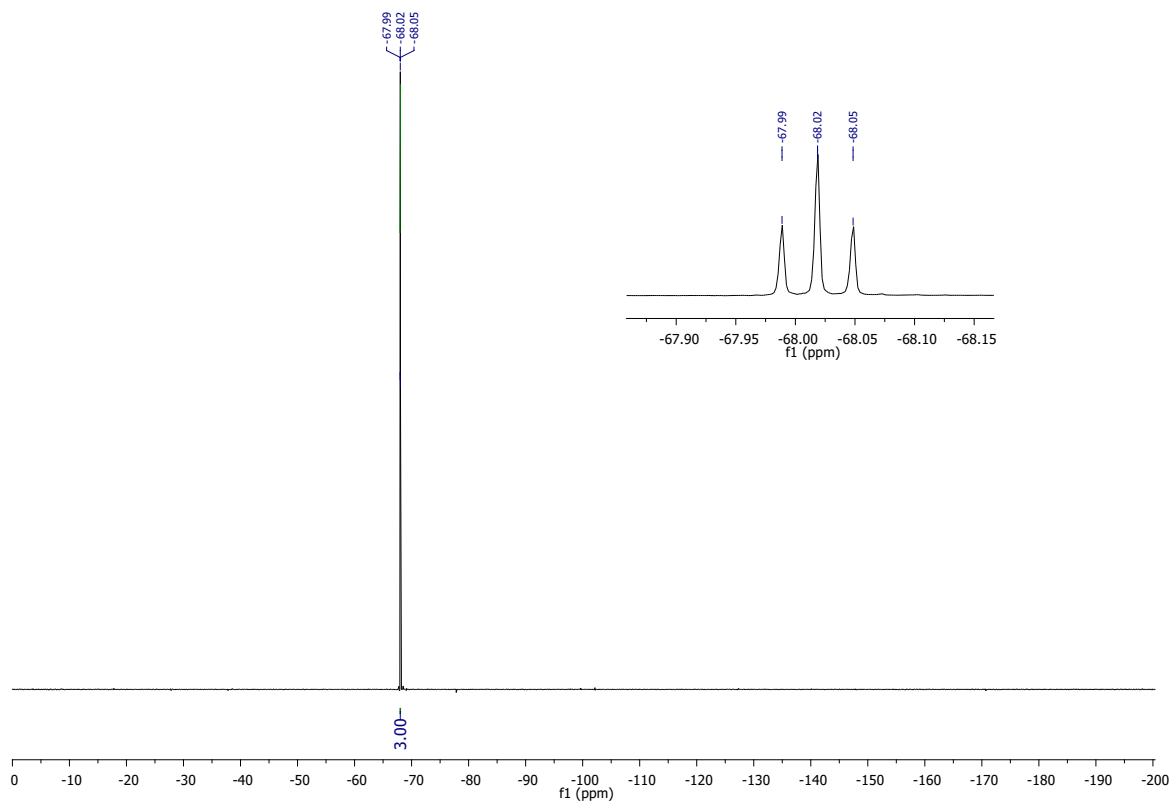

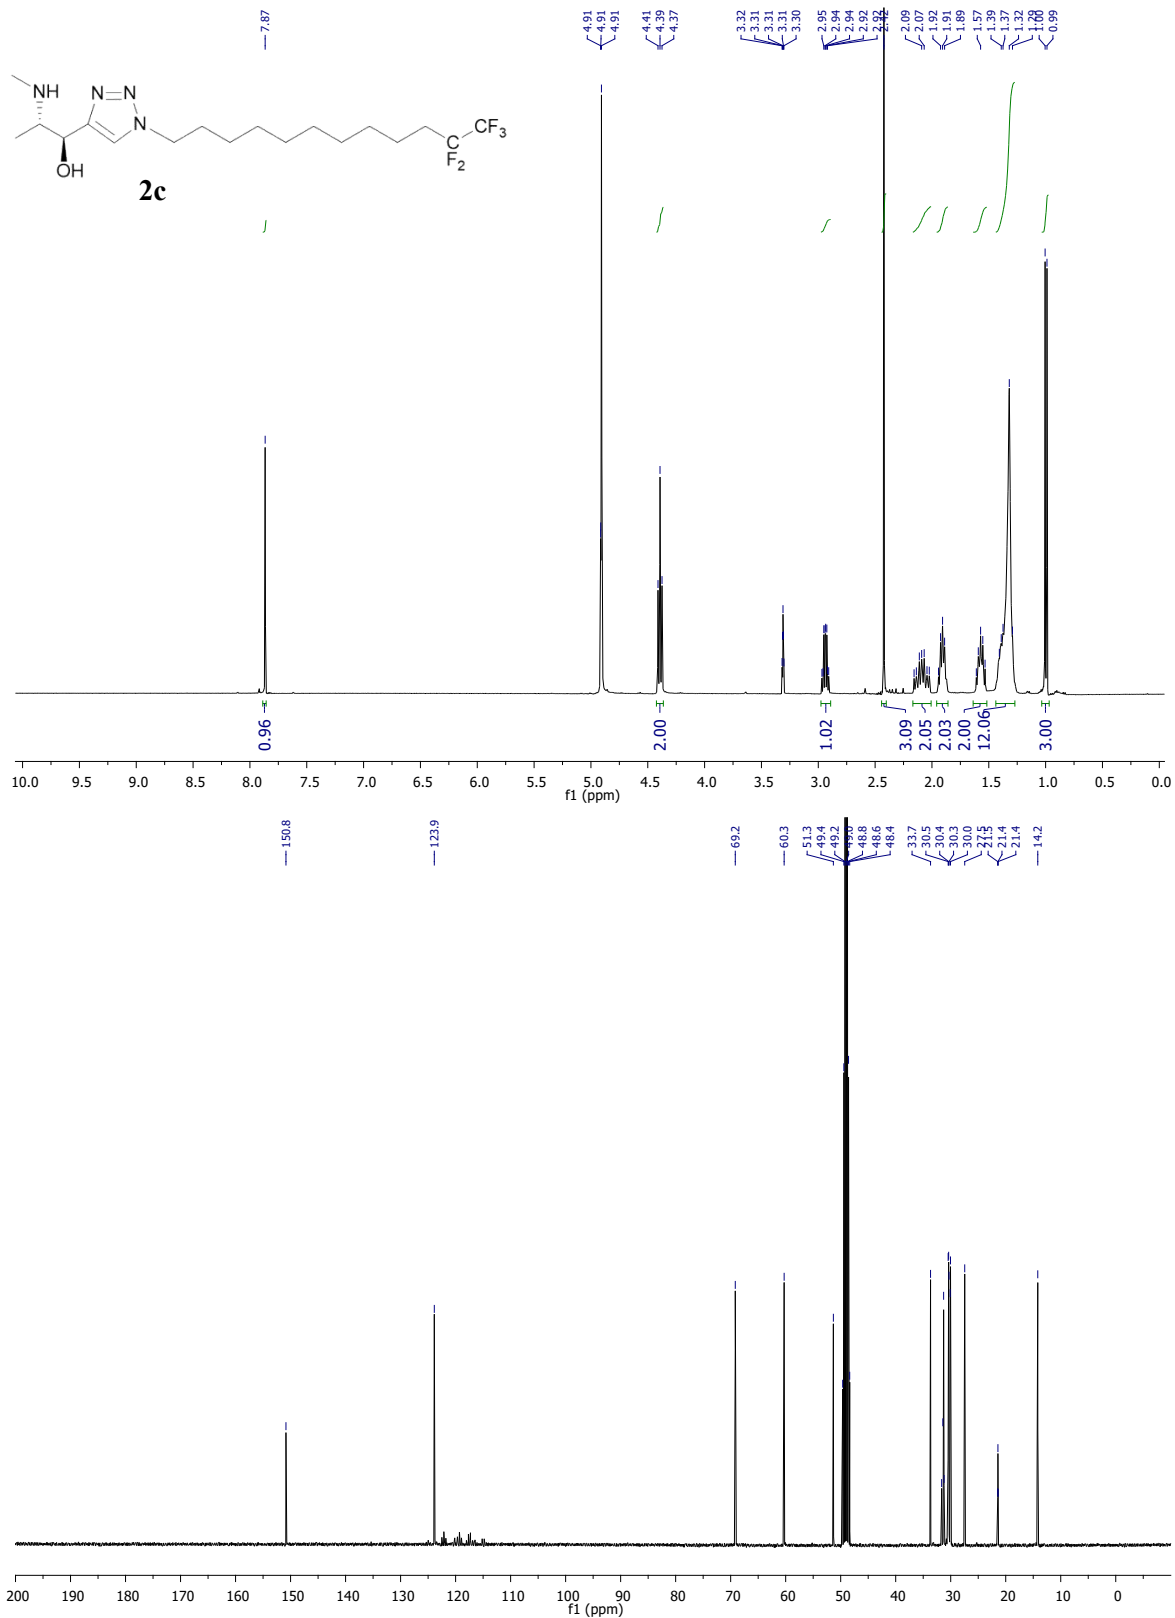



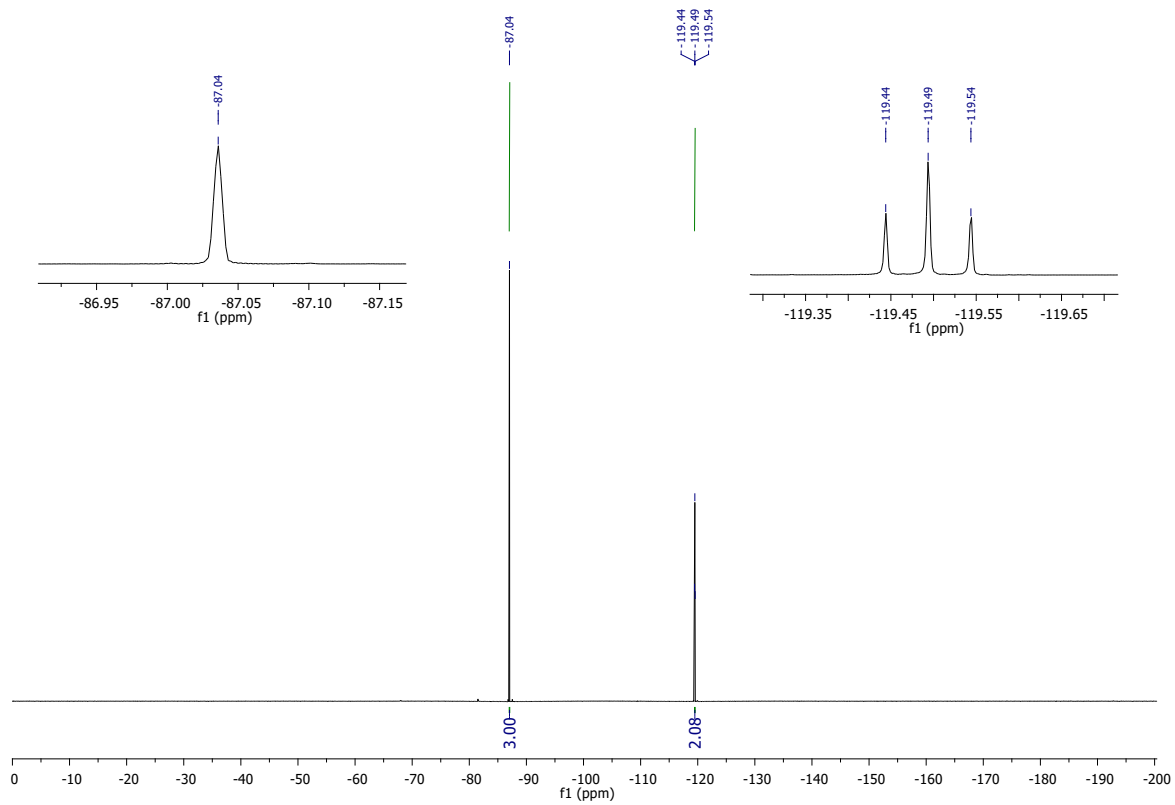

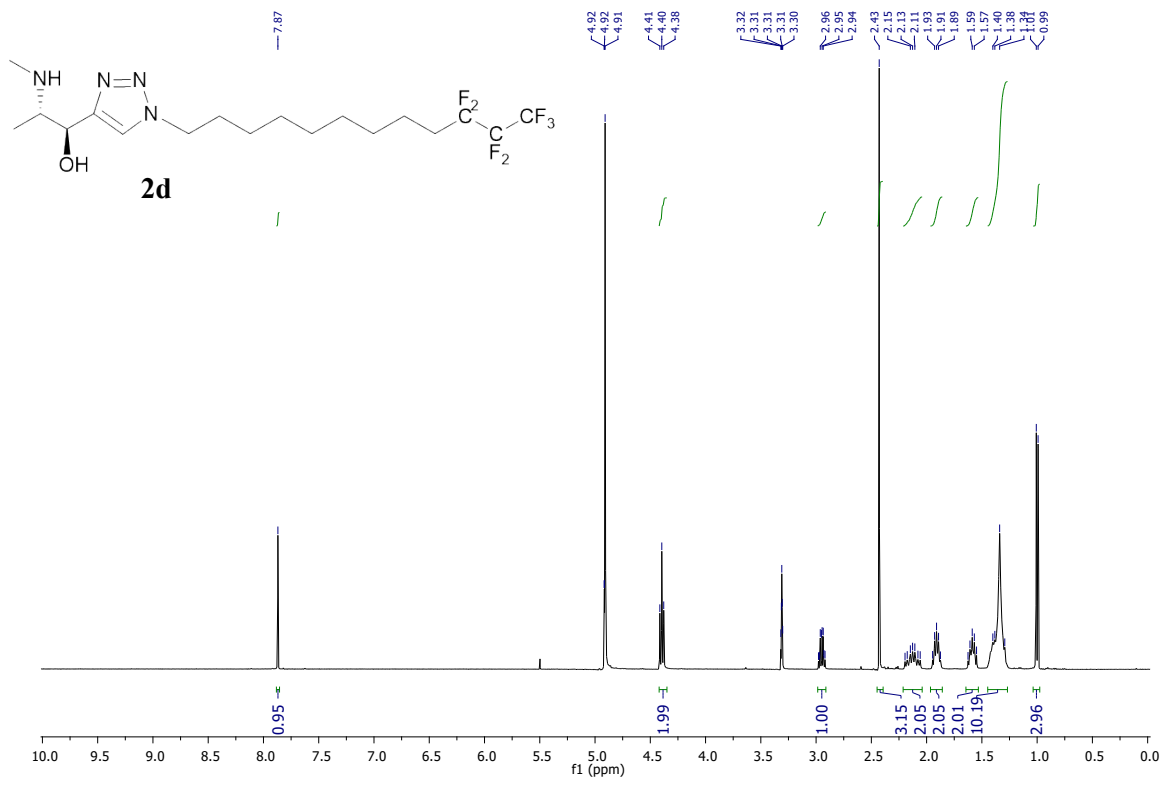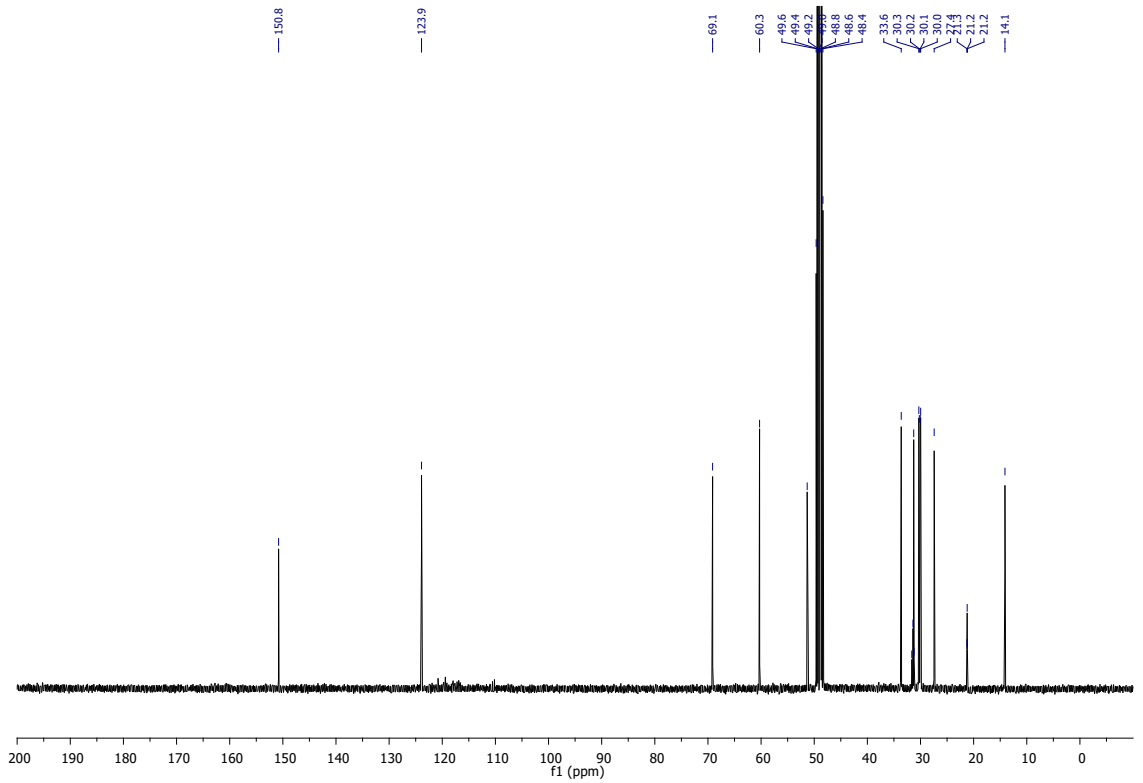

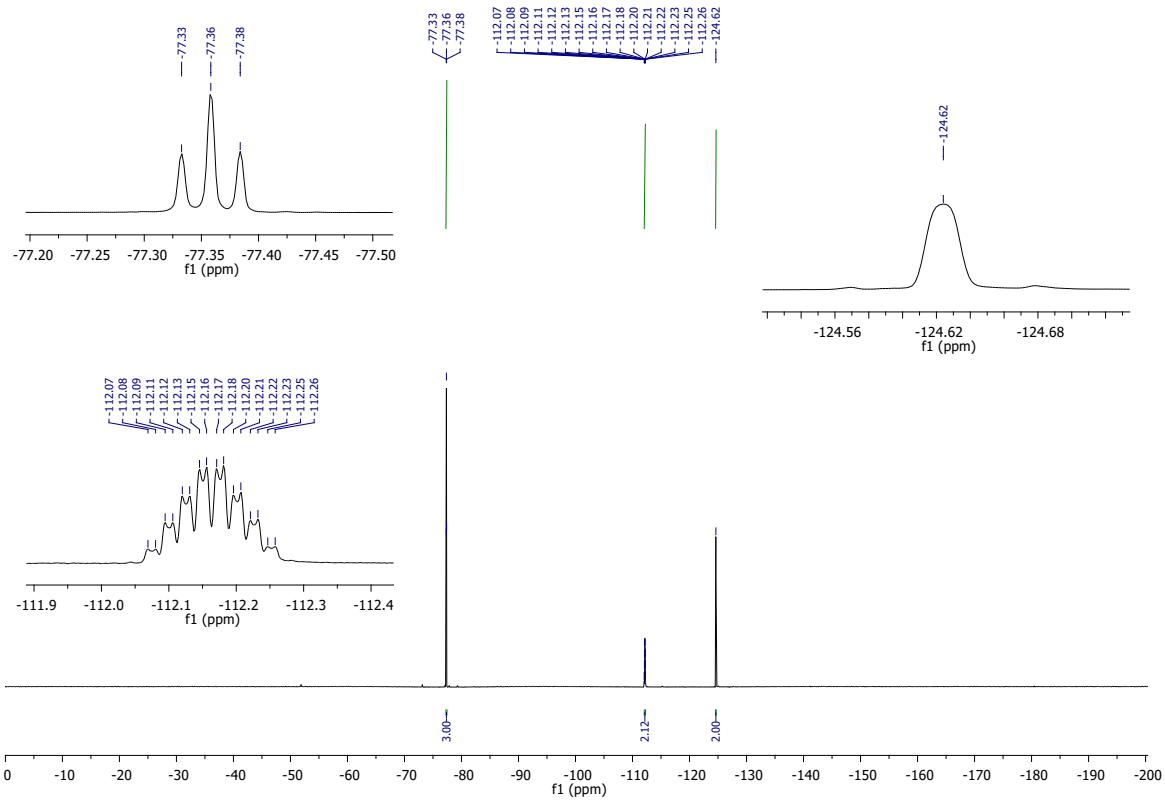

## 5. Sphingosine kinase activity quantification.

In order to evaluate the inhibitory capacity of the synthesized compounds, the Sphingosine kinase activity in presence of these inhibitors was determined.

Adapta™ Universal Kinase Assay kit (Invitrogen, Carlsbad, CA, USA) was used following the manufacturer's protocol. Human SphK1 and SphK2 recombinant proteins (Thermo Fisher, Madrid, Spain) were assayed in independent experiments and each condition was analyzed in triplicate at room temperature. SphK1 was used at final concentration of 0.025 ng/μl, SphK2 at 0.8 ng/μl and ATP and sphingosine were used at a final concentration of 1 μM and 5 μM respectively for both kinases.

Inhibitors were dissolved in 100% DMSO at an initial concentration of 50 mM. Several dilutions were performed also in DMSO, and a pre-dilution of each sample in 1X Kinase Buffer A was performed. The final concentrations assayed of each compound were 200 μM, 150 μM, 100 μM, 80 μM, 60 μM, 40 μM, 20 μM, 10 μM and 5 μM.

TR-FRET was quantified using a CLARIOstar microplate reader (BMG Labtech, Biogen científica SL, Madrid, Spain) using the following parameters: Ex = 340 nm; Em1 = 620/10; Em2 = 665/10; delay = 100 μs; integration time = 200 μs; Focal height = 11 mm. The TR-FRET ratio of each condition was calculated as  $EM_{665nm}/EM_{620nm}$  and results expressed as a percentage of inhibition using the following equation:

$$\% inhibition = \frac{(Ratio_{sample} - Ratio_{0\% inhibition})}{(Ratio_{100\% inhibition} - Ratio_{0\% inhibition})}$$

IC<sub>50</sub> of each compound was calculated fitting the data to a sigmoidal dose-response curve with variable slope.

Figure 1. Inhibition curves of each compound for SK1

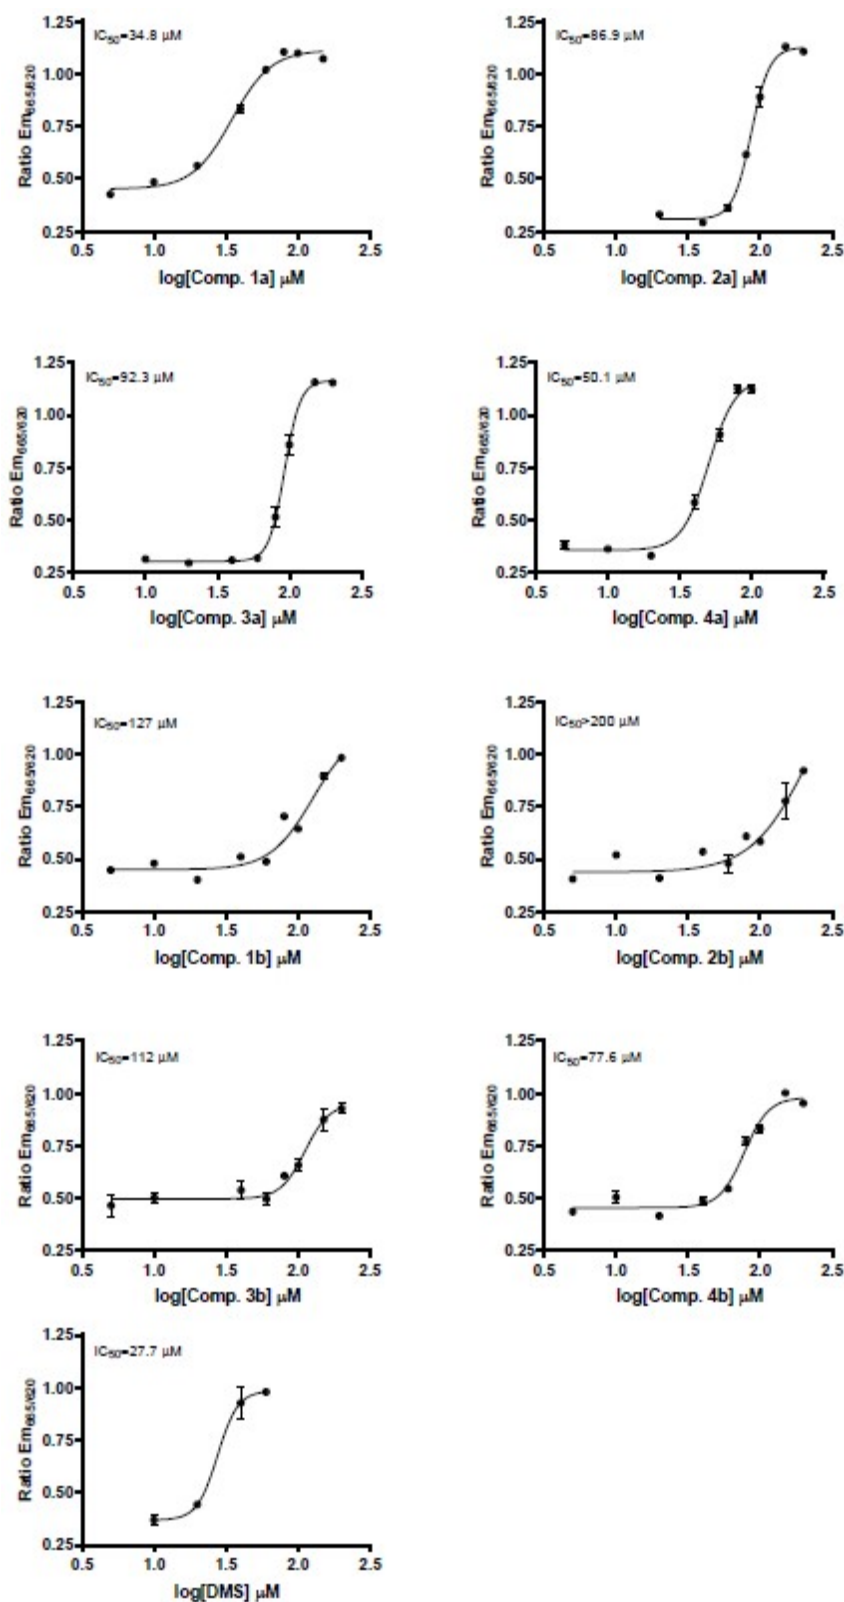

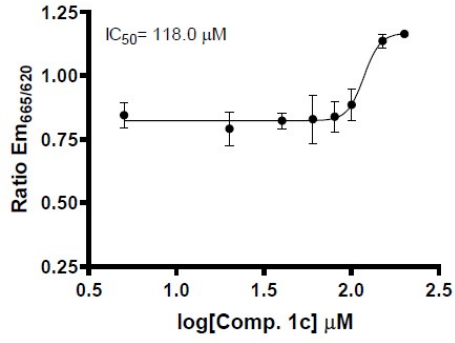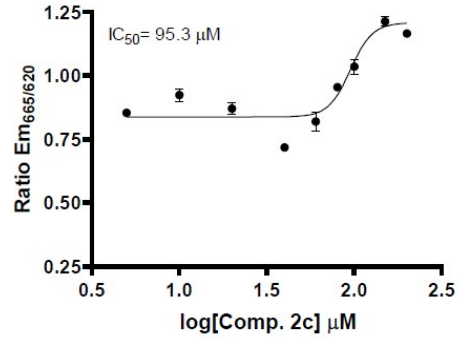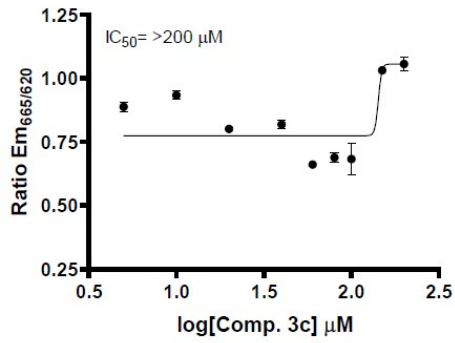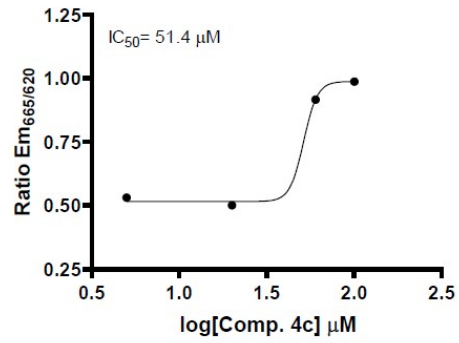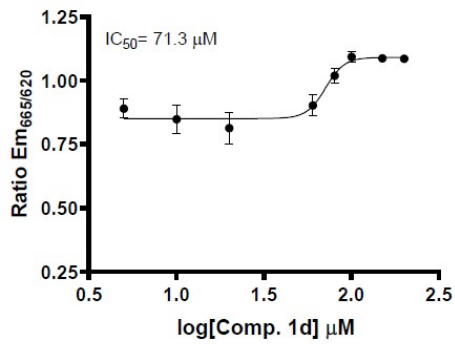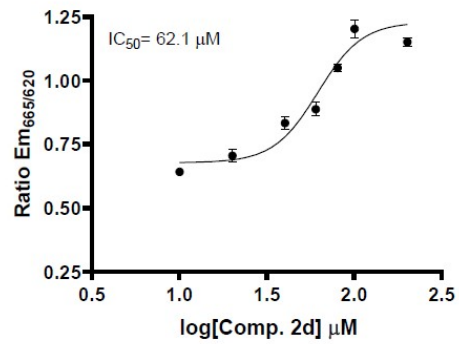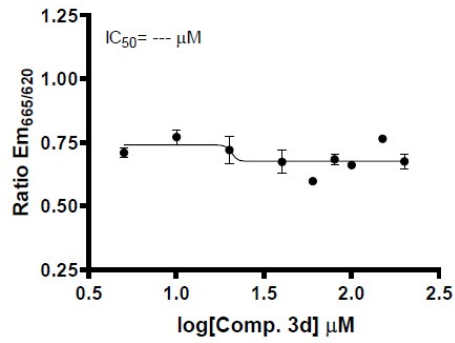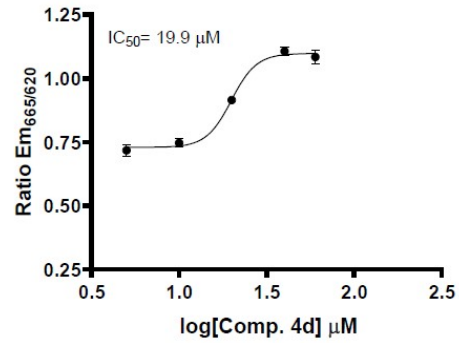

**Figure 2. Inhibition curves of each compound for SphK2:**

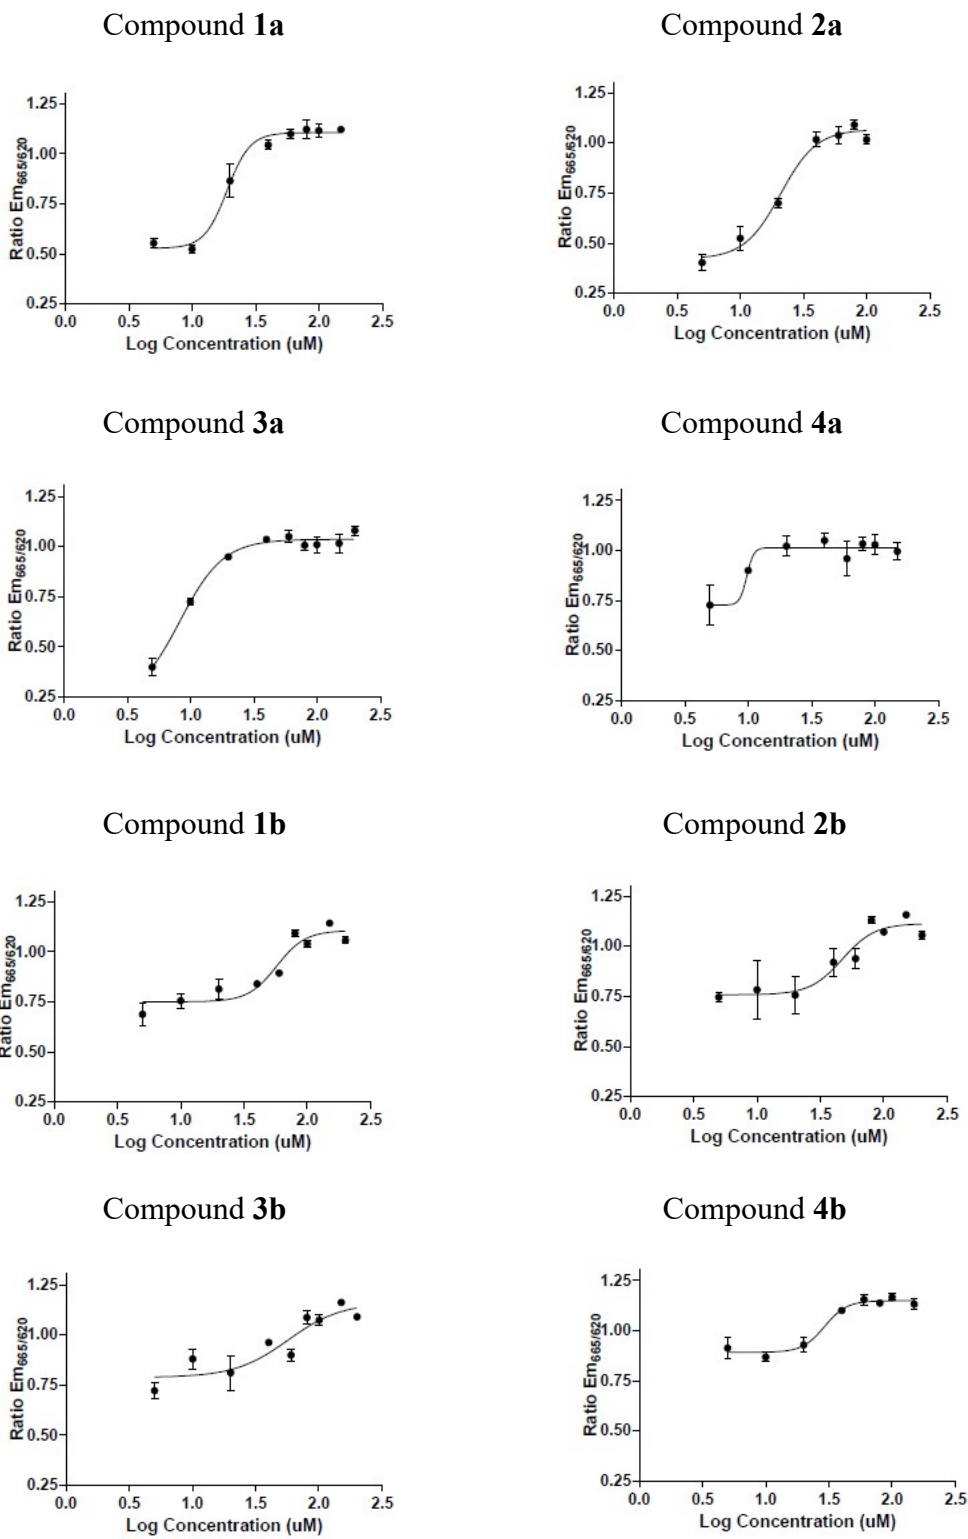

Compound 1c

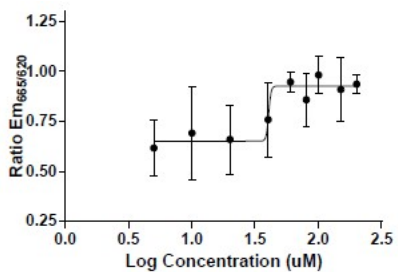

Compound 2c

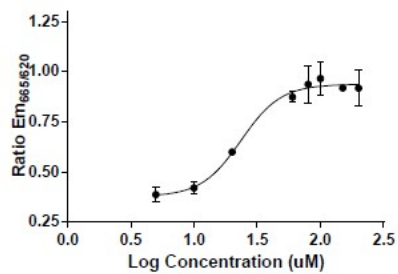

Compound 3c

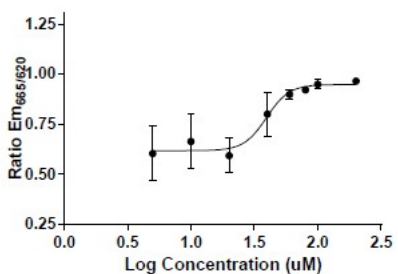

Compound 4c

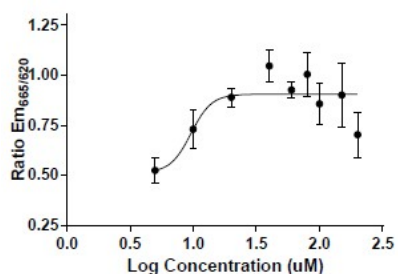

Compound 1d

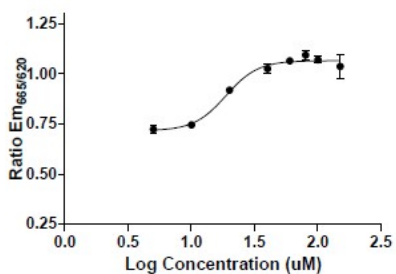

Compound 2d

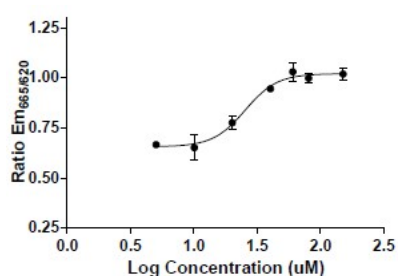

Compound 3d

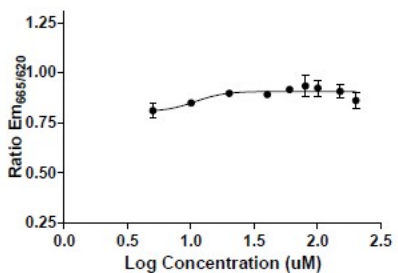

Compound 4d

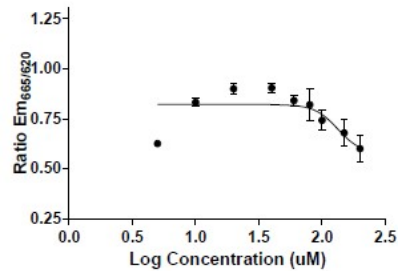



## 6. Docking studies.

### 6.1. General procedure

The protein structures of Sphk1 and Sphk2 were set up following the protocol previously described.<sup>4</sup> The crystal structure of Sphk1 (PDB ID: 3VZB, chain A) was prepared using MOE software,<sup>5</sup> retaining a key structural water molecule that interacts with residues Ser298 and Gly456. For Sphk2, which does not have an available crystal structure, a homology model was built in MOE using the same Sphk1 crystal structure, although the water molecule was omitted due to differences in residues. The synthesized molecules under study were prepared using MOE, Openbabel 3,<sup>6</sup> and Corina software.<sup>7</sup> Docking studies were conducted with rDock,<sup>8</sup> which included generating a docking cavity based on the cocrystallized sphingosine ligand, docking the prepared molecules, and scoring the resulting binding poses. The best-scored poses were analysed using PyMol visualization system.

### 6.2. Additional figures

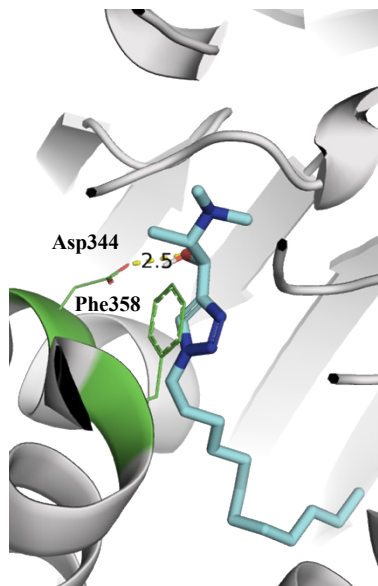

**Figure 3.** Best binding mode in SphK2 for compound **3a**.

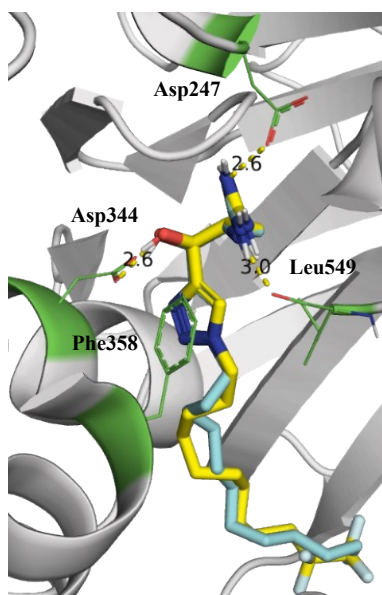

**Figure 4.** Best binding mode in SphK2 for compound 4c.

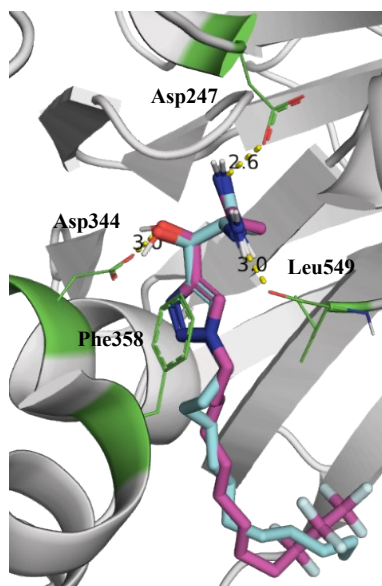

**Figure 5.** Best binding mode in SphK2 for compound 4d.

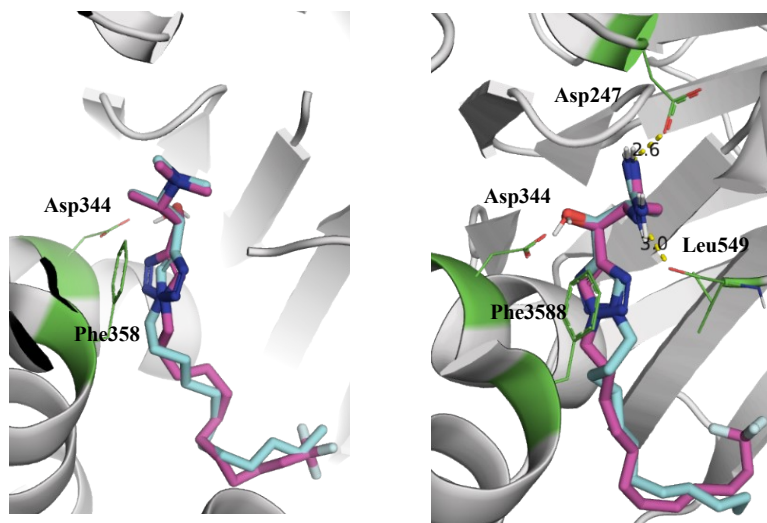

**Figure 6.** Best binding mode in Sphk2 for the less active compounds **3b** (left, pink in comparison with **3a**, blue) and **4b** (right, pink, in comparison with **4a** (blue)).

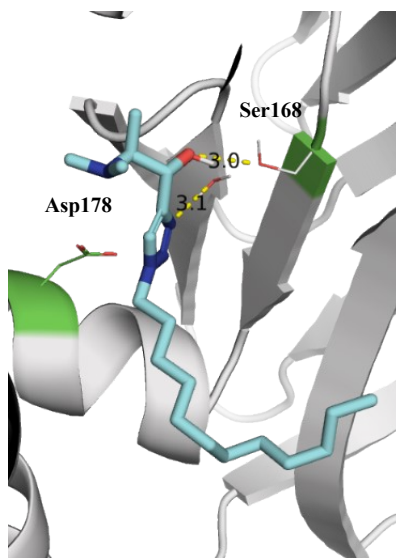

**Figure 7.** Best binding mode in SphK1 for compound **3a**.

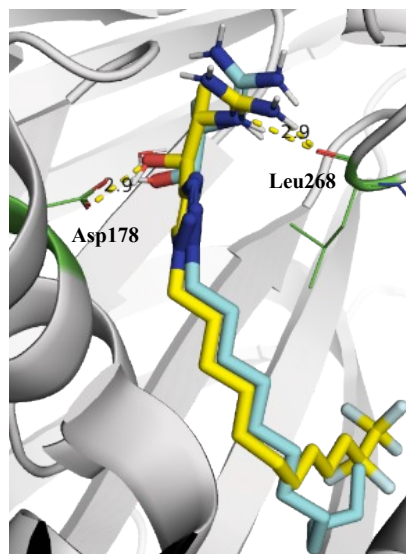

**Figure 8.** Best binding mode in SphK1 for compound **4c** (yellow) in comparison with **4a** (blue).

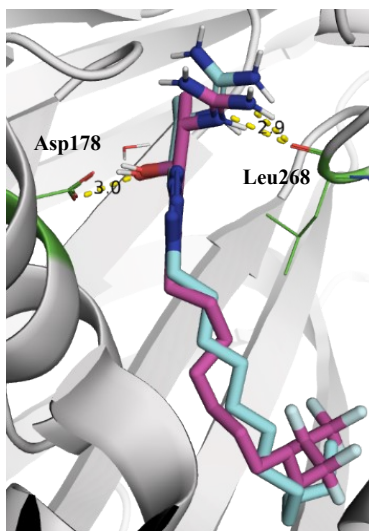

**Figure 9.** Best binding mode in SphK1 for compound **4d** (pink) in comparison with **4a** (blue).

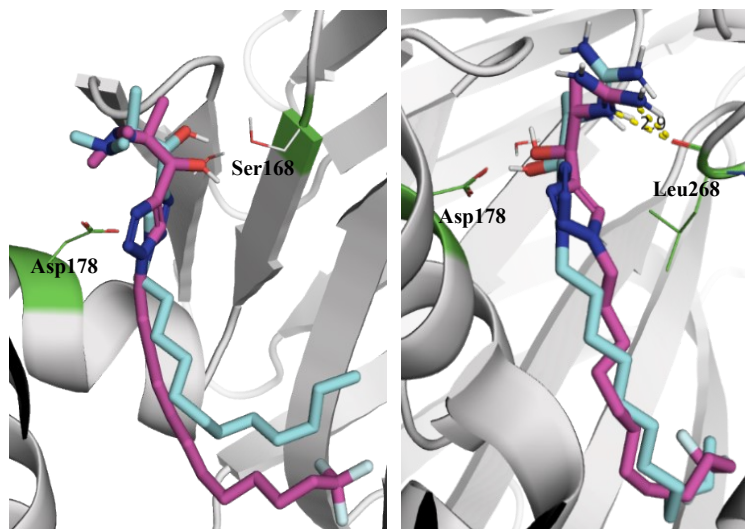

**Figure 10.** Best binding mode in SphK1 for the less active compounds **3b** (left, pink in comparison with **3a**, blue) and **4b** (right, pink), in comparison with **4a** (blue).

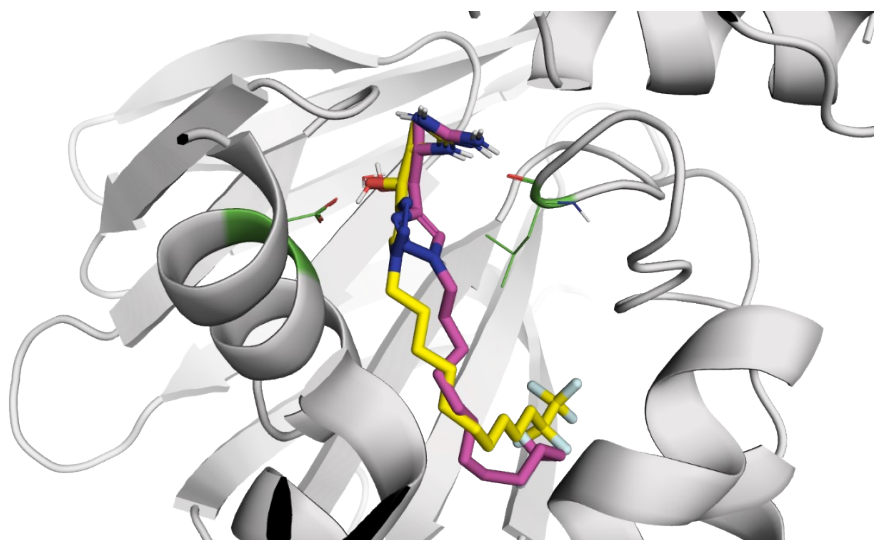

**Figure 11.** Best binding mode in SphK1 for compound **4c** (yellow) in comparison with **4b** (pink).

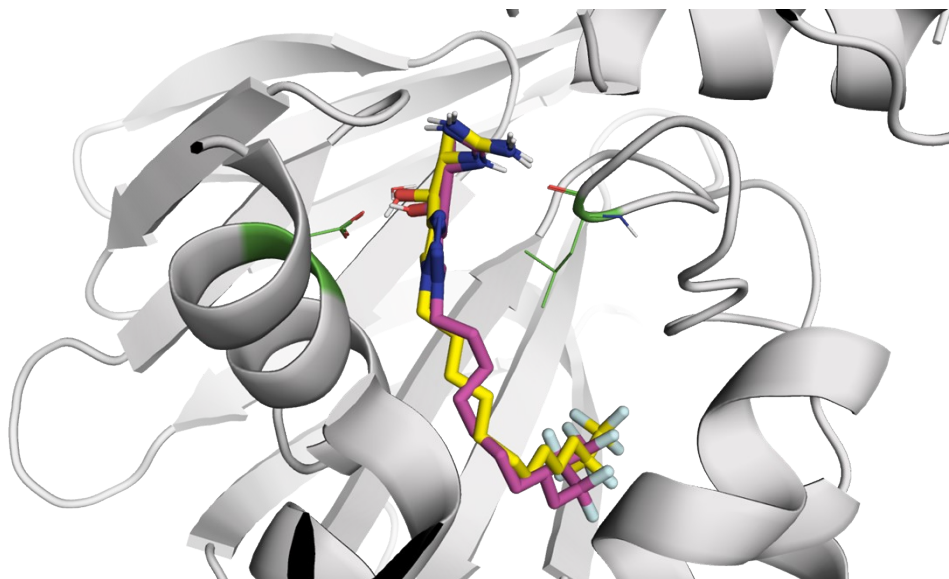

**Figure 12.** Best binding mode in SphK1 product **4d** (pink) in comparison with **4c** (yellow).

## 7. References

---

- <sup>1</sup> J.M. Andres, R. Pedrosa and A. Pérez-Encabo, *Eur. J. Org. Chem.* 2006, 3442.
- <sup>2</sup> H. Chong and Y. Chen, *Org. Lett.* 2013, **15**, 5912.
- <sup>3</sup> J. Sikoraiová, S. Marchalín, A. Chihab-Eddine and A. Daïch, *J. Heterocycl. Chem.* 2002, **39**, 383.
- <sup>4</sup> M. Escudero-Casao, A. Cardona, R. Beltrán-Debón, Y. Díaz, M.I. Matheu and S. Castellón, *Org. Biomol. Chem.* 2018, **16**, 7230.
- <sup>5</sup> Molecular Operating Environment (MOE), 2019.01; Chemical Computing Group ULC, 1010 Sherbooke St. West, Suite #910, Montreal, QC, Canada, H3A 2R7, 2021.
- <sup>6</sup> N.M. O'Boyle, M. Banck, C.A. James, C. Morley, T. Vandermeersch and G. R. Hutchison, *J. Cheminform.* 2011, **3**, 33.
- <sup>7</sup> Chemoinformatics ProgramPackage CORINA Classic, developed and distributed by Molecular Networks GmbH, Nuremberg, Germany and Altamira LLC, Columbus, OH, USA. [www.mn-am.com](http://www.mn-am.com).
- <sup>8</sup> S. Ruiz-Carmona, D. Alvarez-Garcia, N. Foloppe, A.B. Garmendia-Doval, S. Juhos, P. Schmidtke, X. Barril, R.E. Hubbard and S.D. Morley, *PLoS Comput. Biol.* 2014, **10**, e1003571.
